# Supplementary material for: Linearization of carbohydrate derived polycyclic frameworks
Source: Royal Society of Chemistry journal article supplement (doi:10.1039/c4ra04845h), 2014-01-01
Supplement: c4ra04845h1.pdf [file c4ra04845h1.pdf]

# Supporting Information

## Linearization of carbohydrate derived polycyclic frameworks

Priyanka Singh, Gautam Panda\*

Medicinal and Process Chemistry Division, CSIR-Central Drug Research Institute,  
Lucknow-226031, UP, India

### Contents

NMR spectrum of compounds

Page No.

2-73

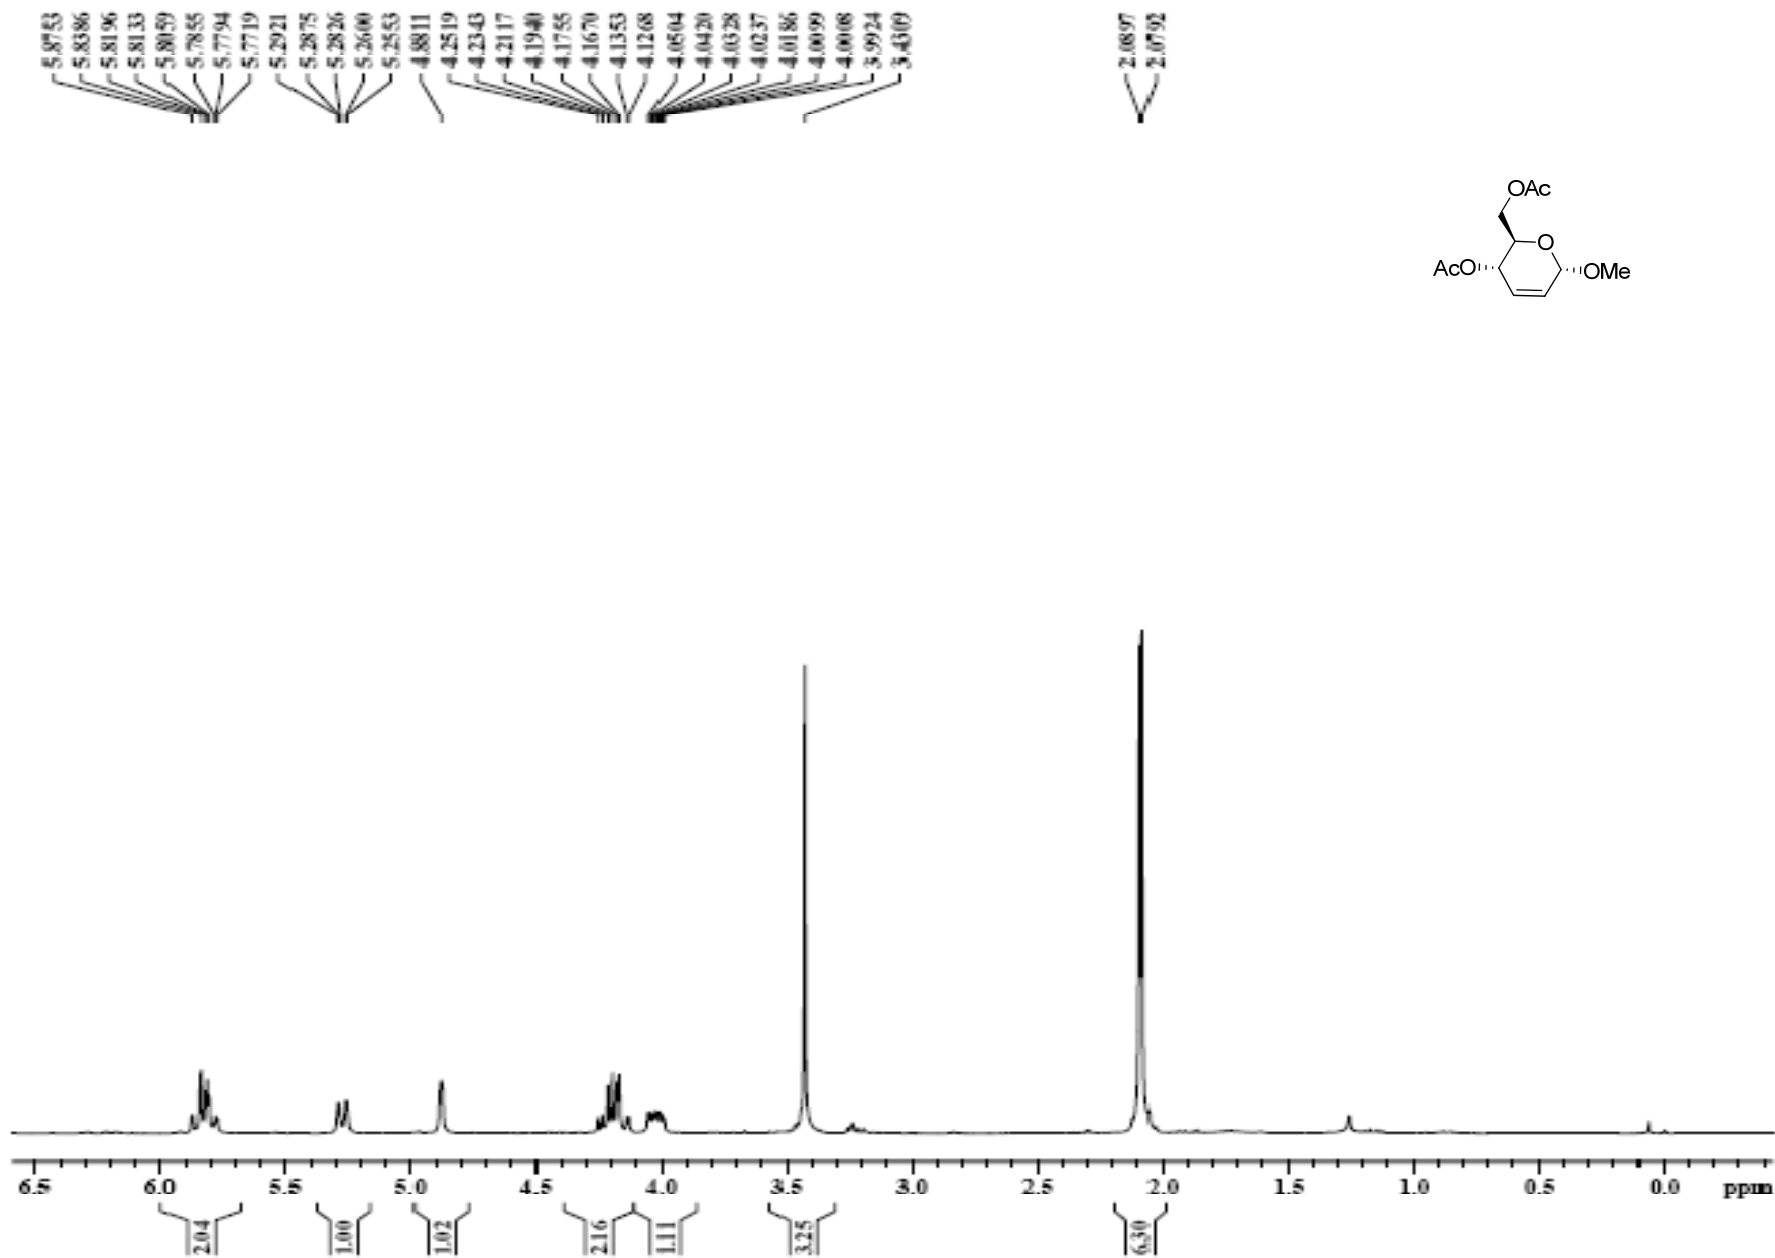

**Figure 1** <sup>1</sup>H NMR spectrum of compound 2

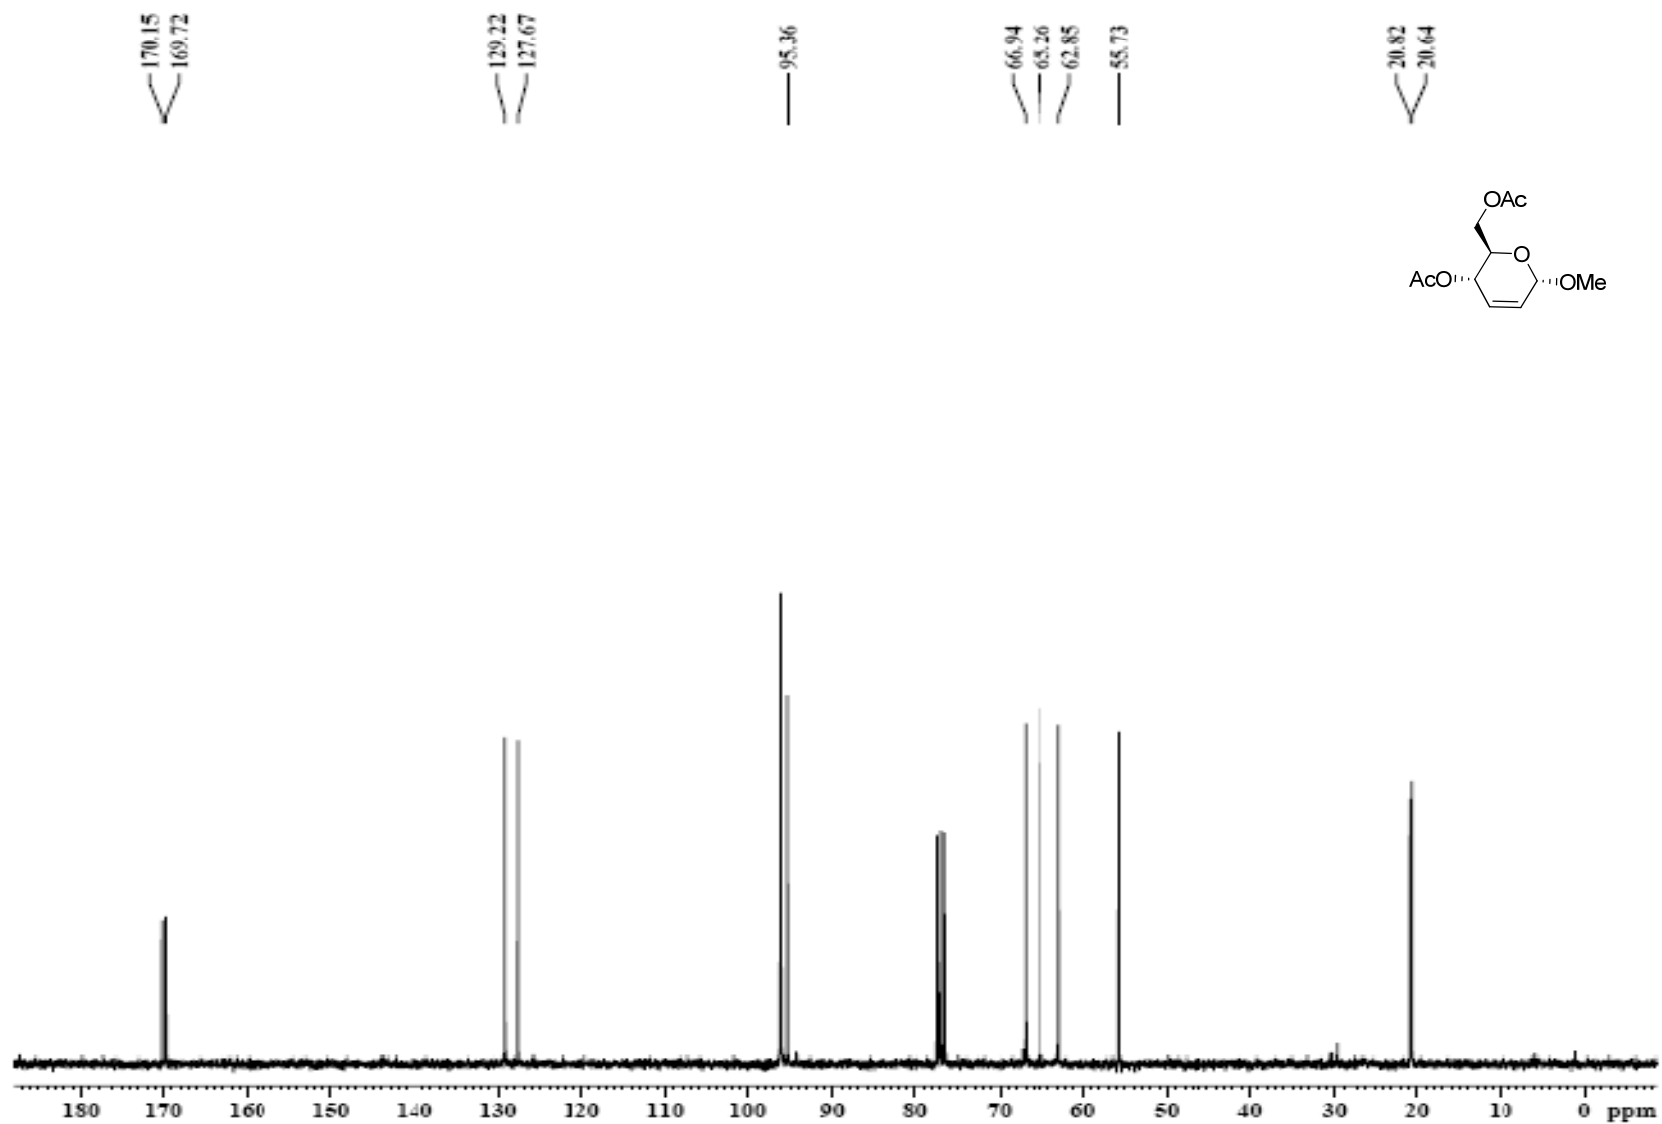

Figure 2  $^{13}\text{C}$  NMR spectrum of compound 2

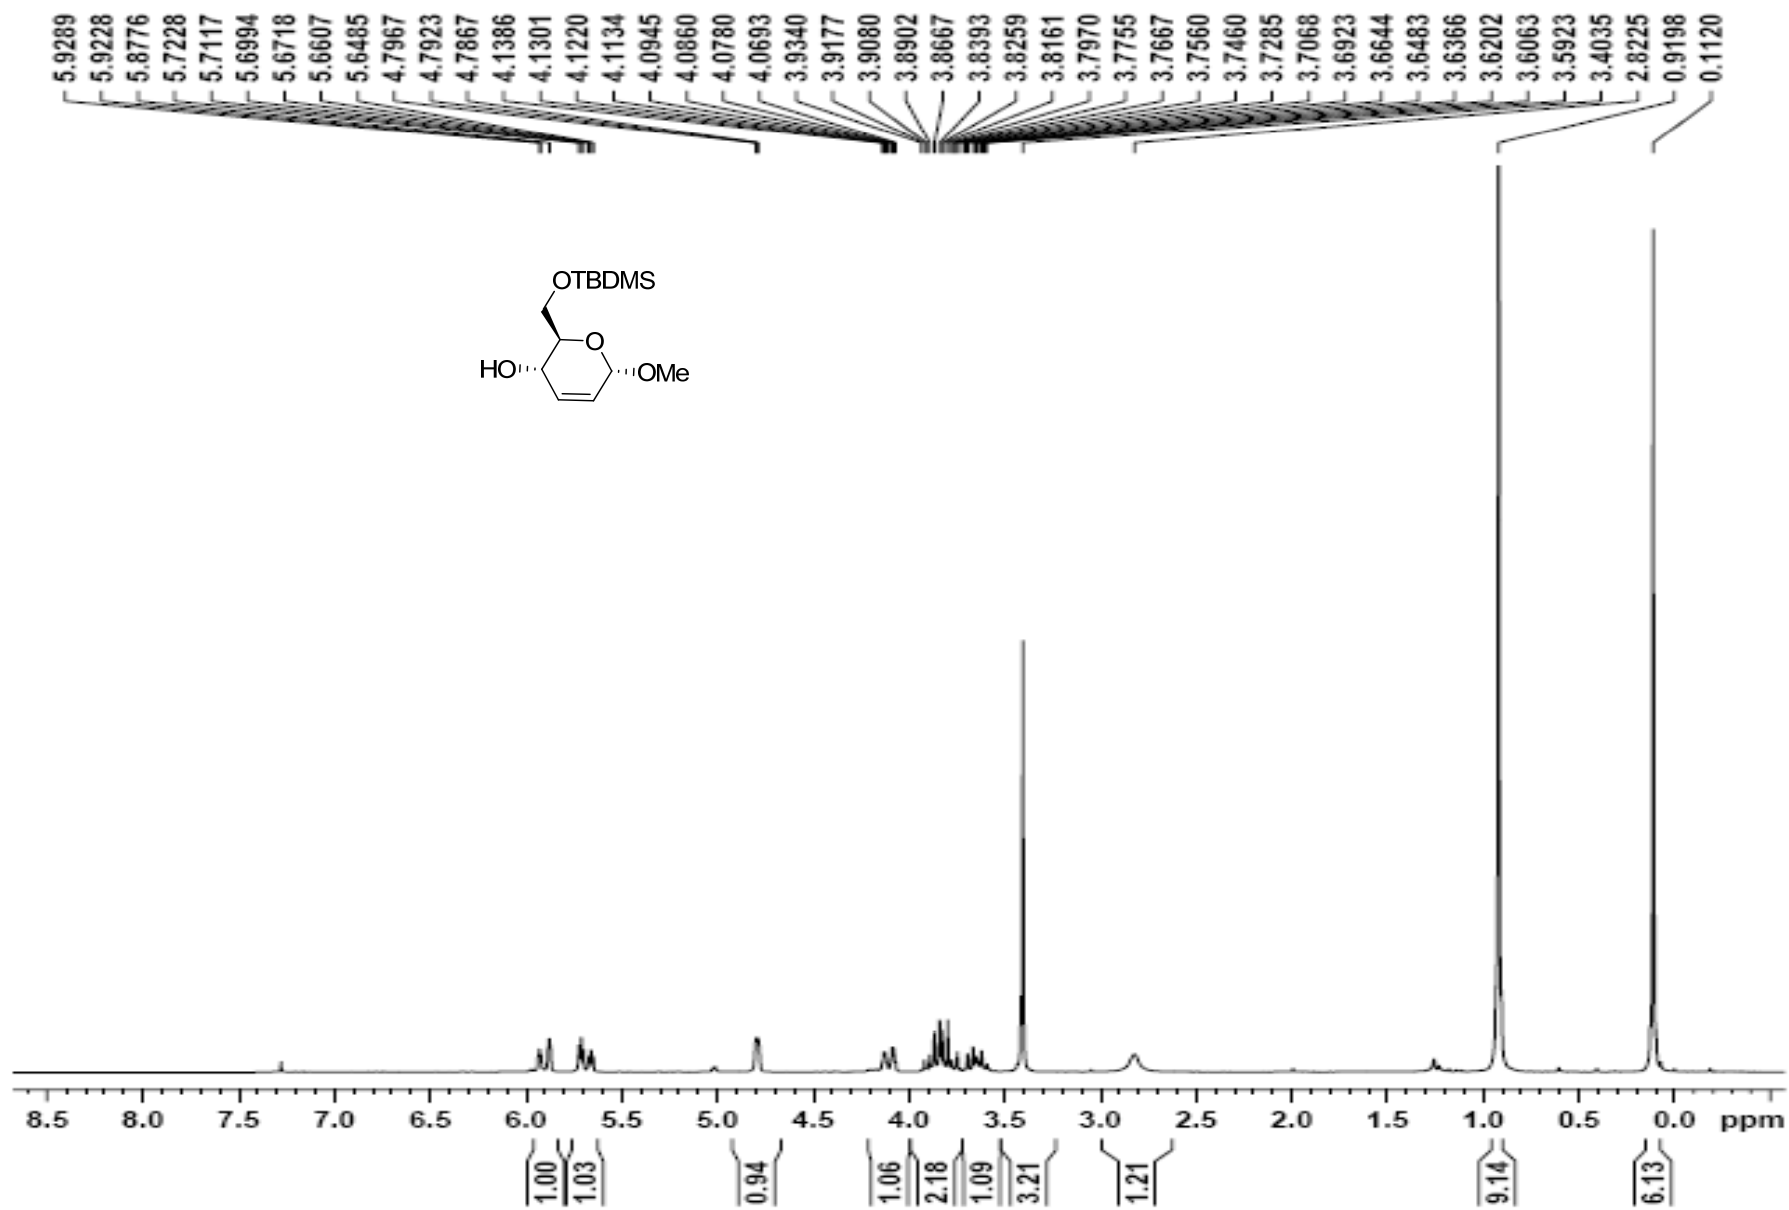

**Figure 3** <sup>1</sup>H NMR spectrum of compound **4**

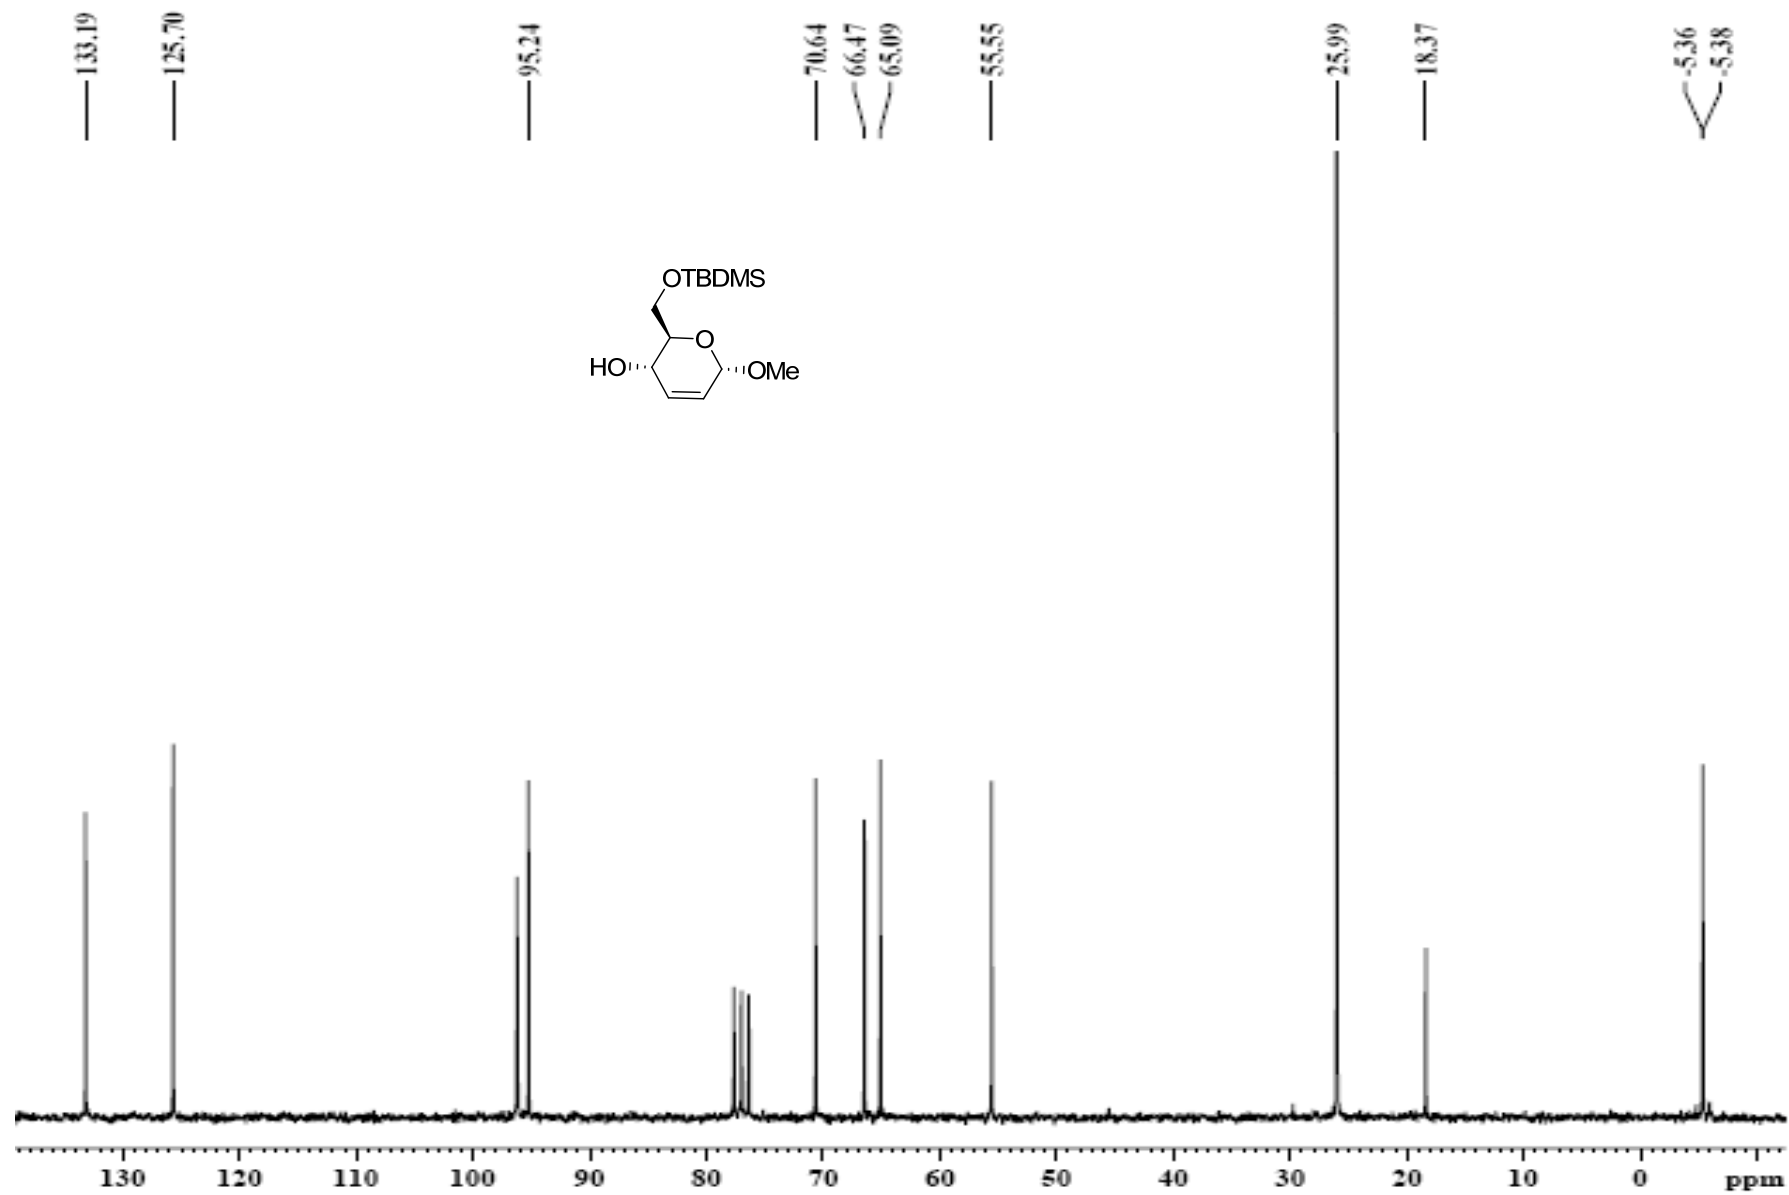

Figure 4 <sup>13</sup>C NMR spectrum of compound 4

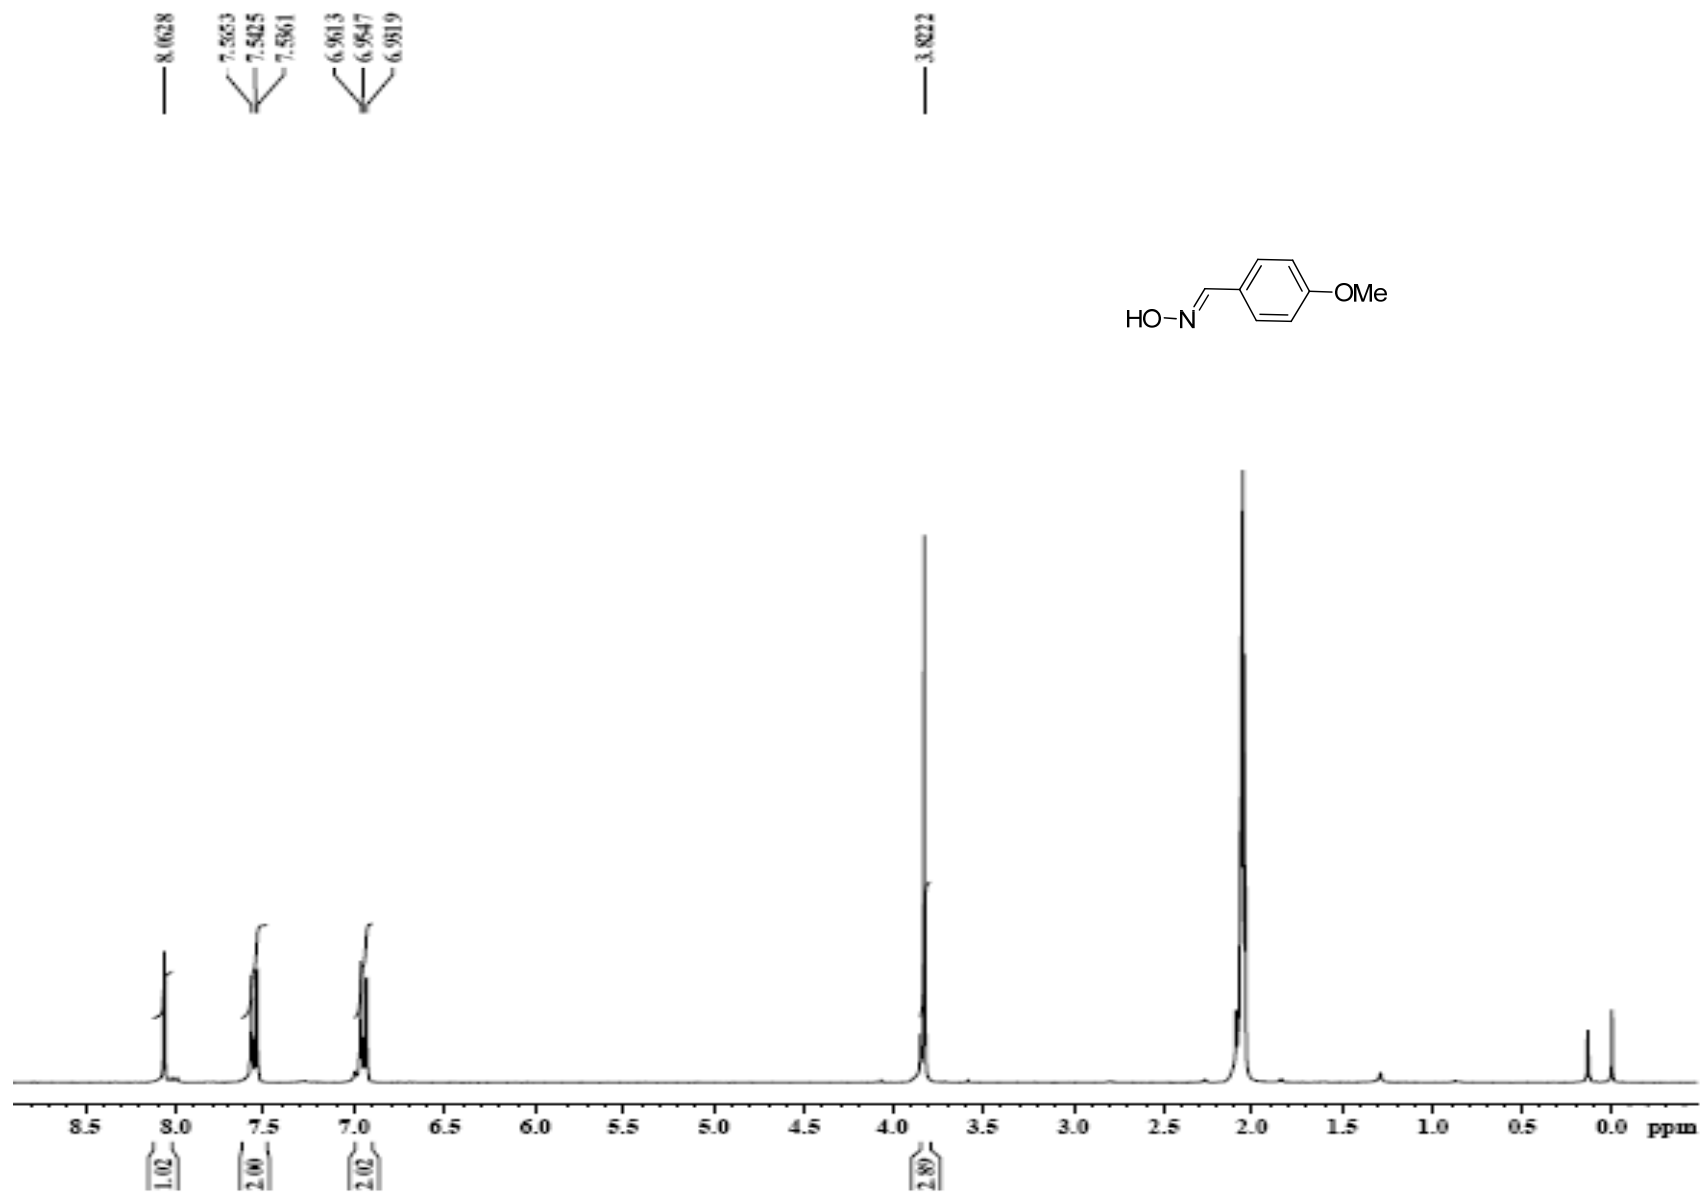

**Figure 5** <sup>1</sup>H NMR spectrum of compound **9**

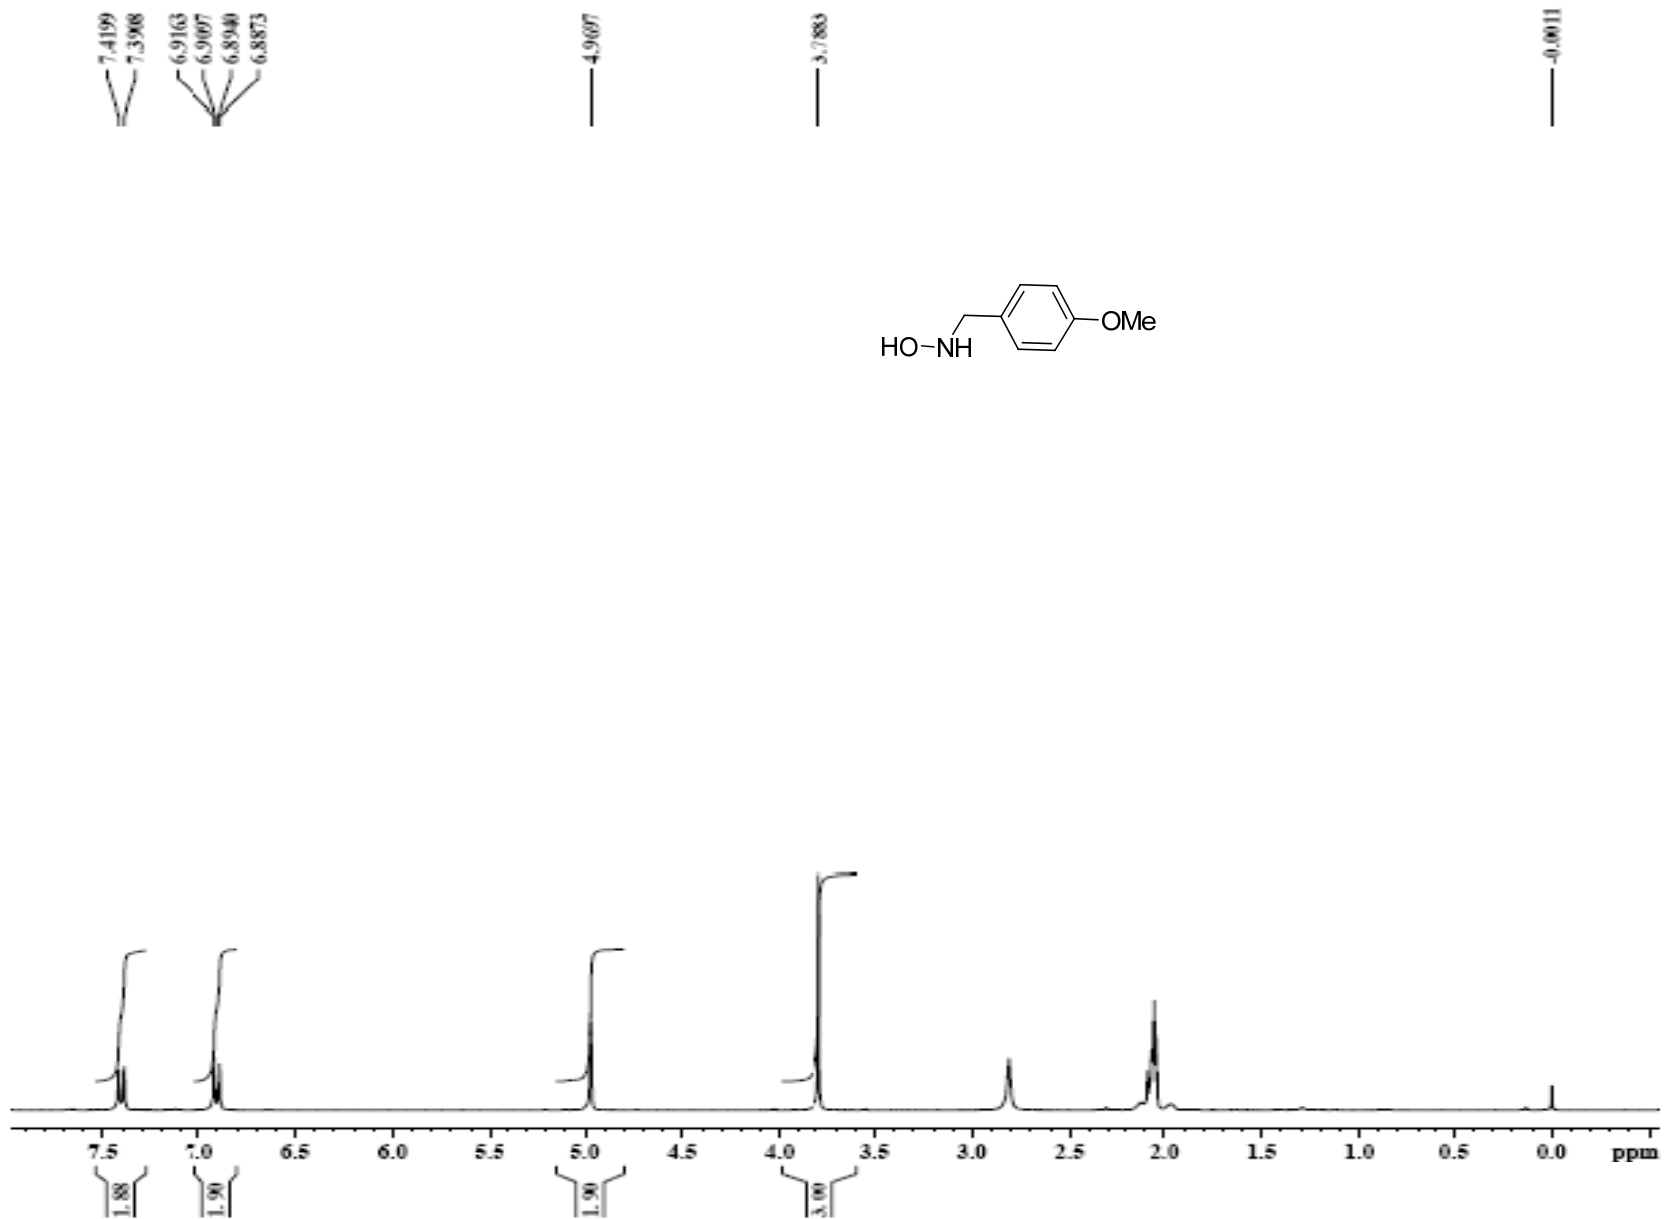

Figure 6 <sup>1</sup>H NMR spectrum of compound 10

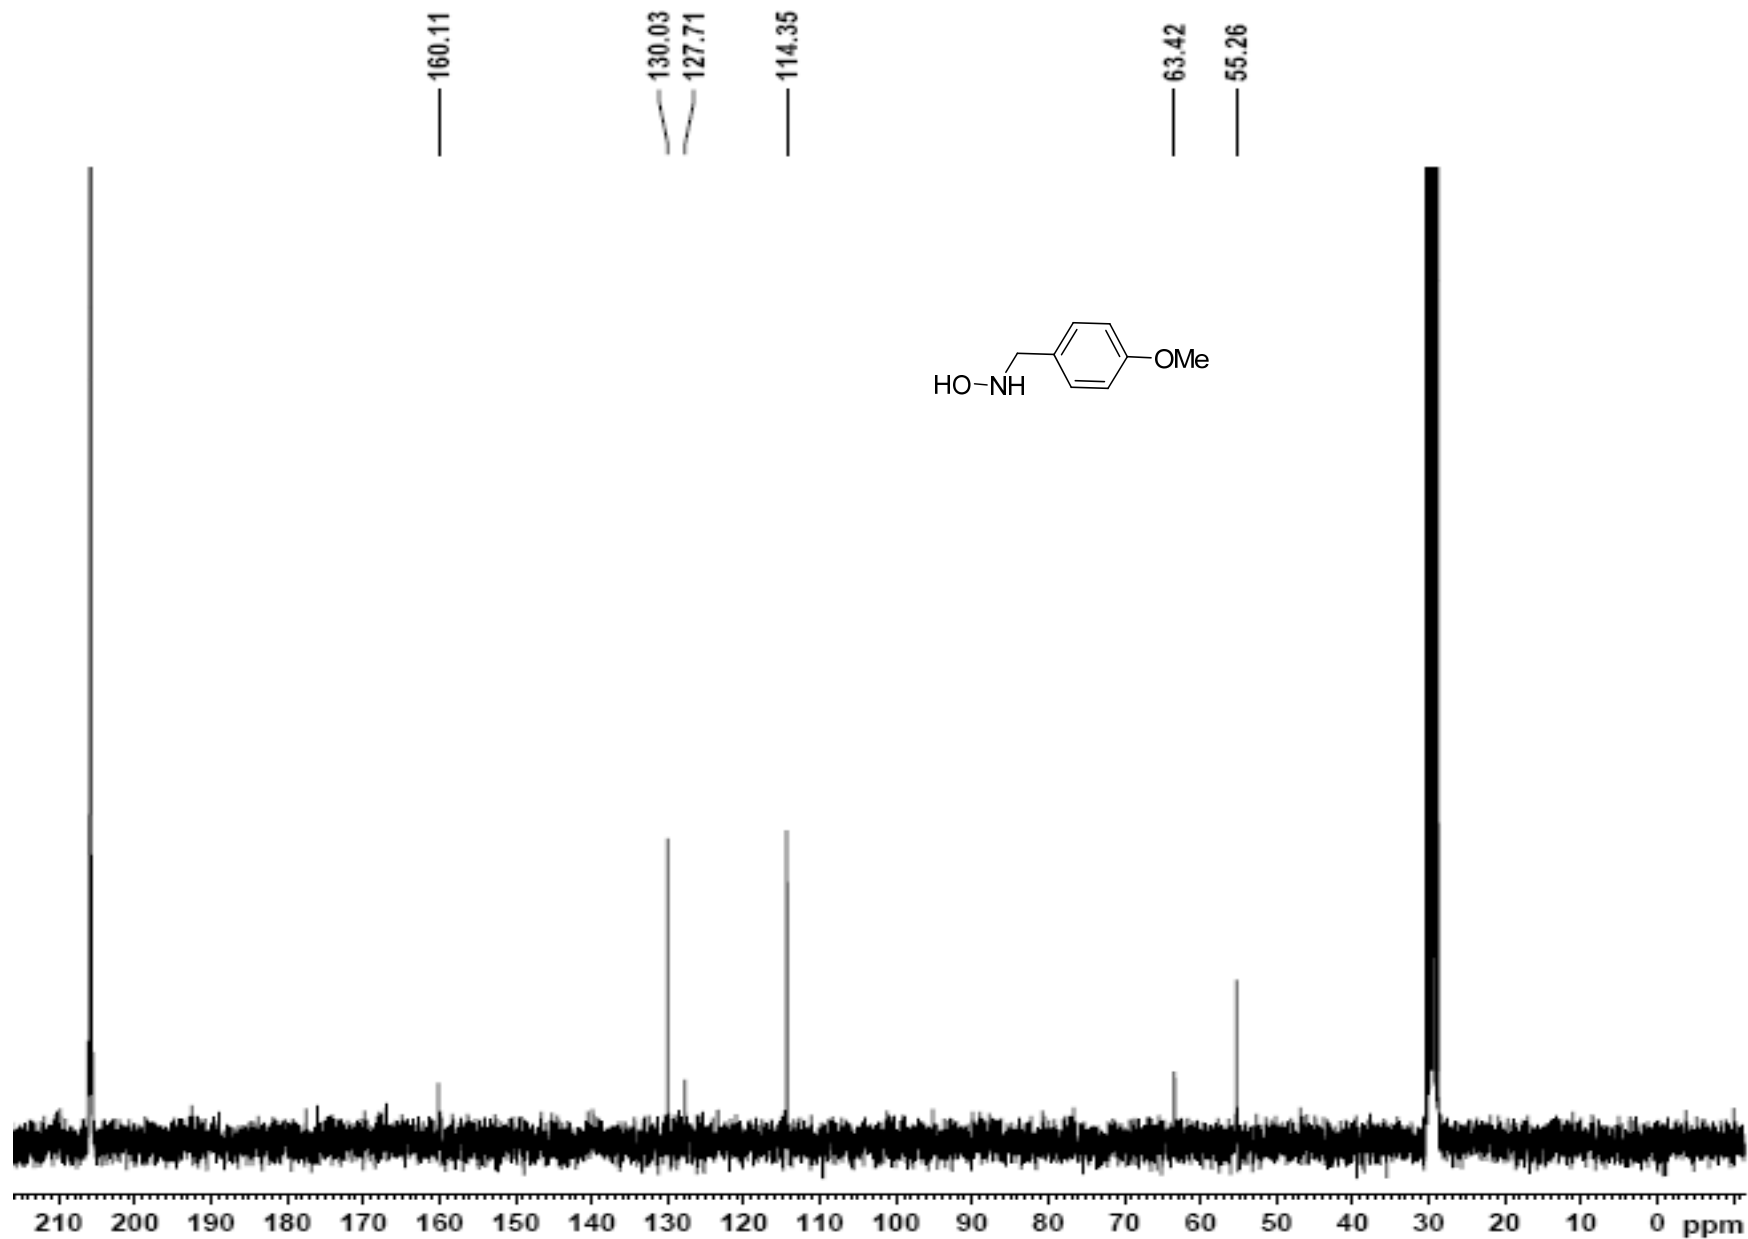

Figure 7  $^{13}\text{C}$  NMR spectrum of compound 10



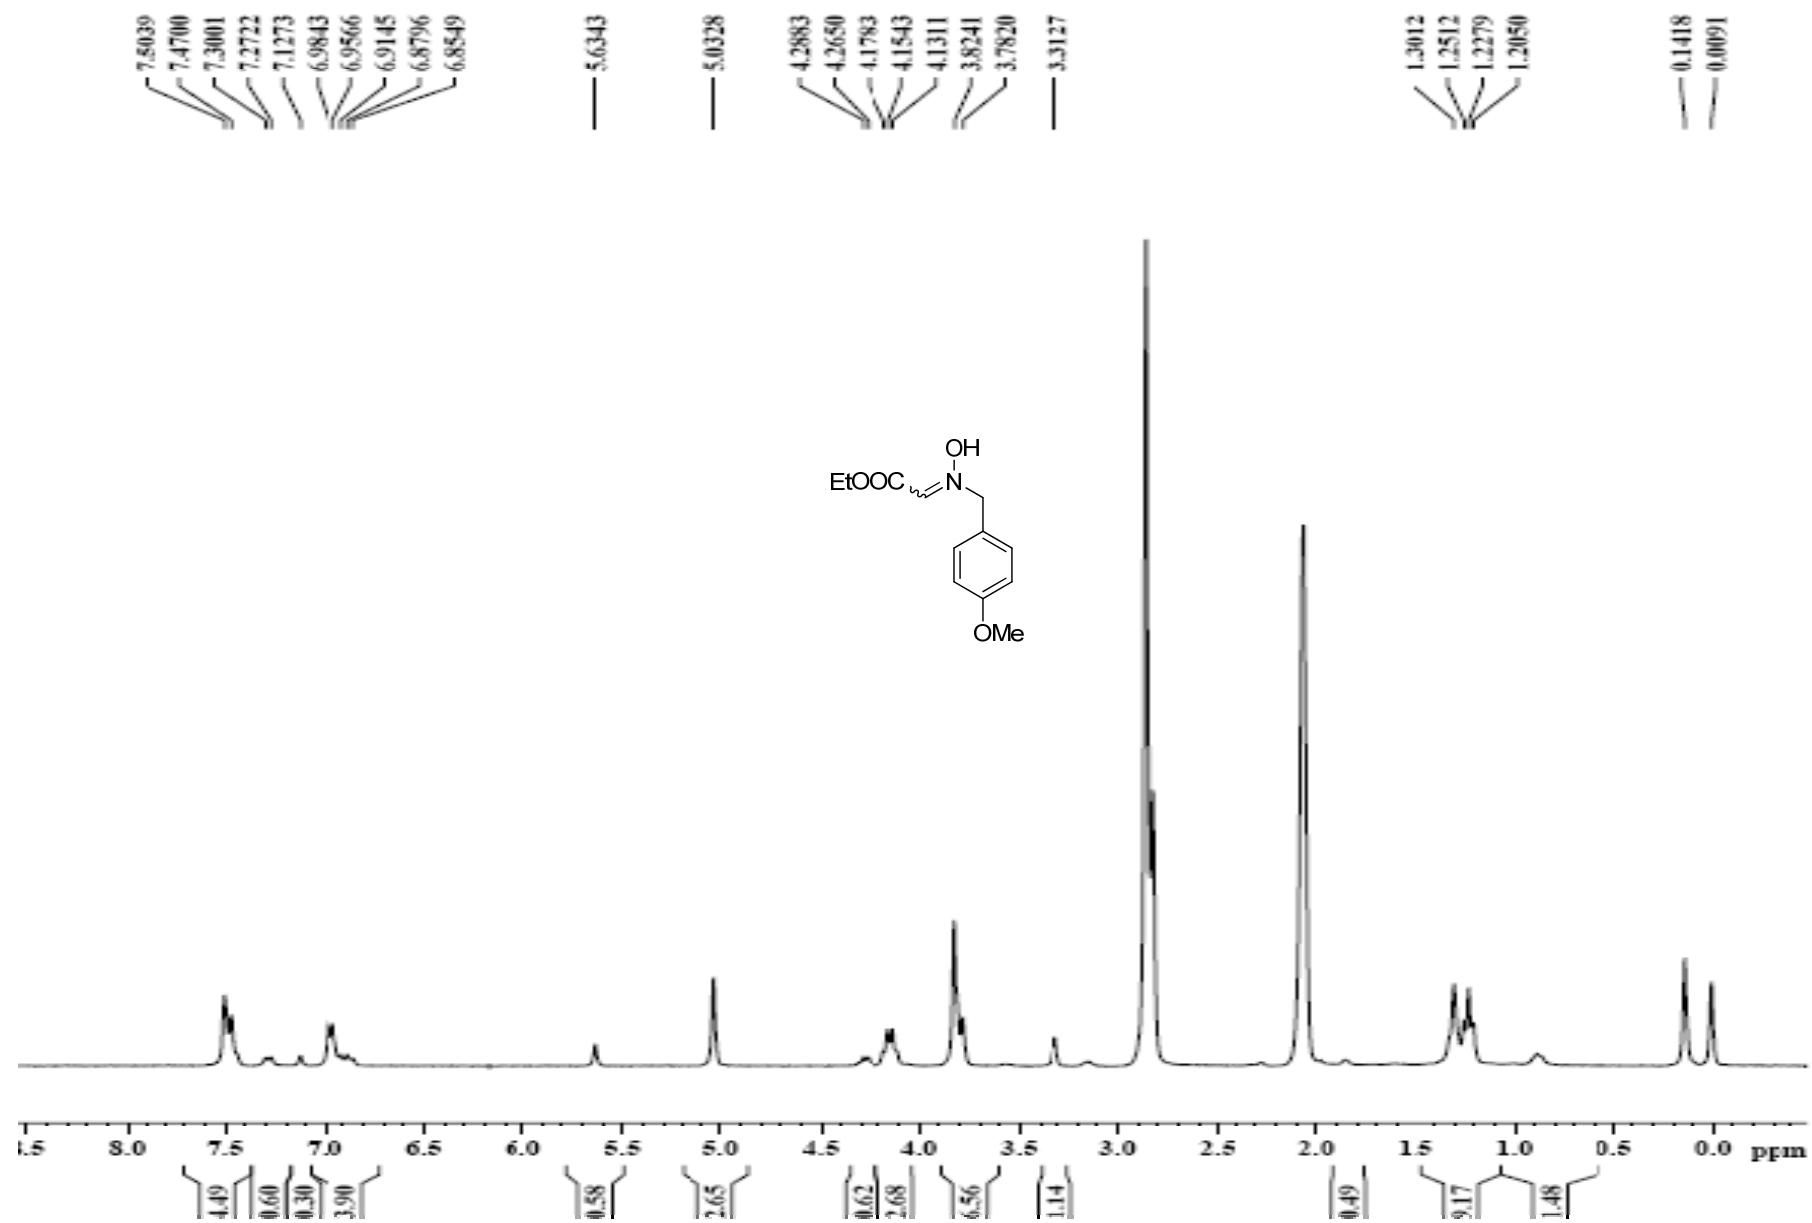

**Figure 8**  $^1\text{H}$  NMR spectrum of compound 5

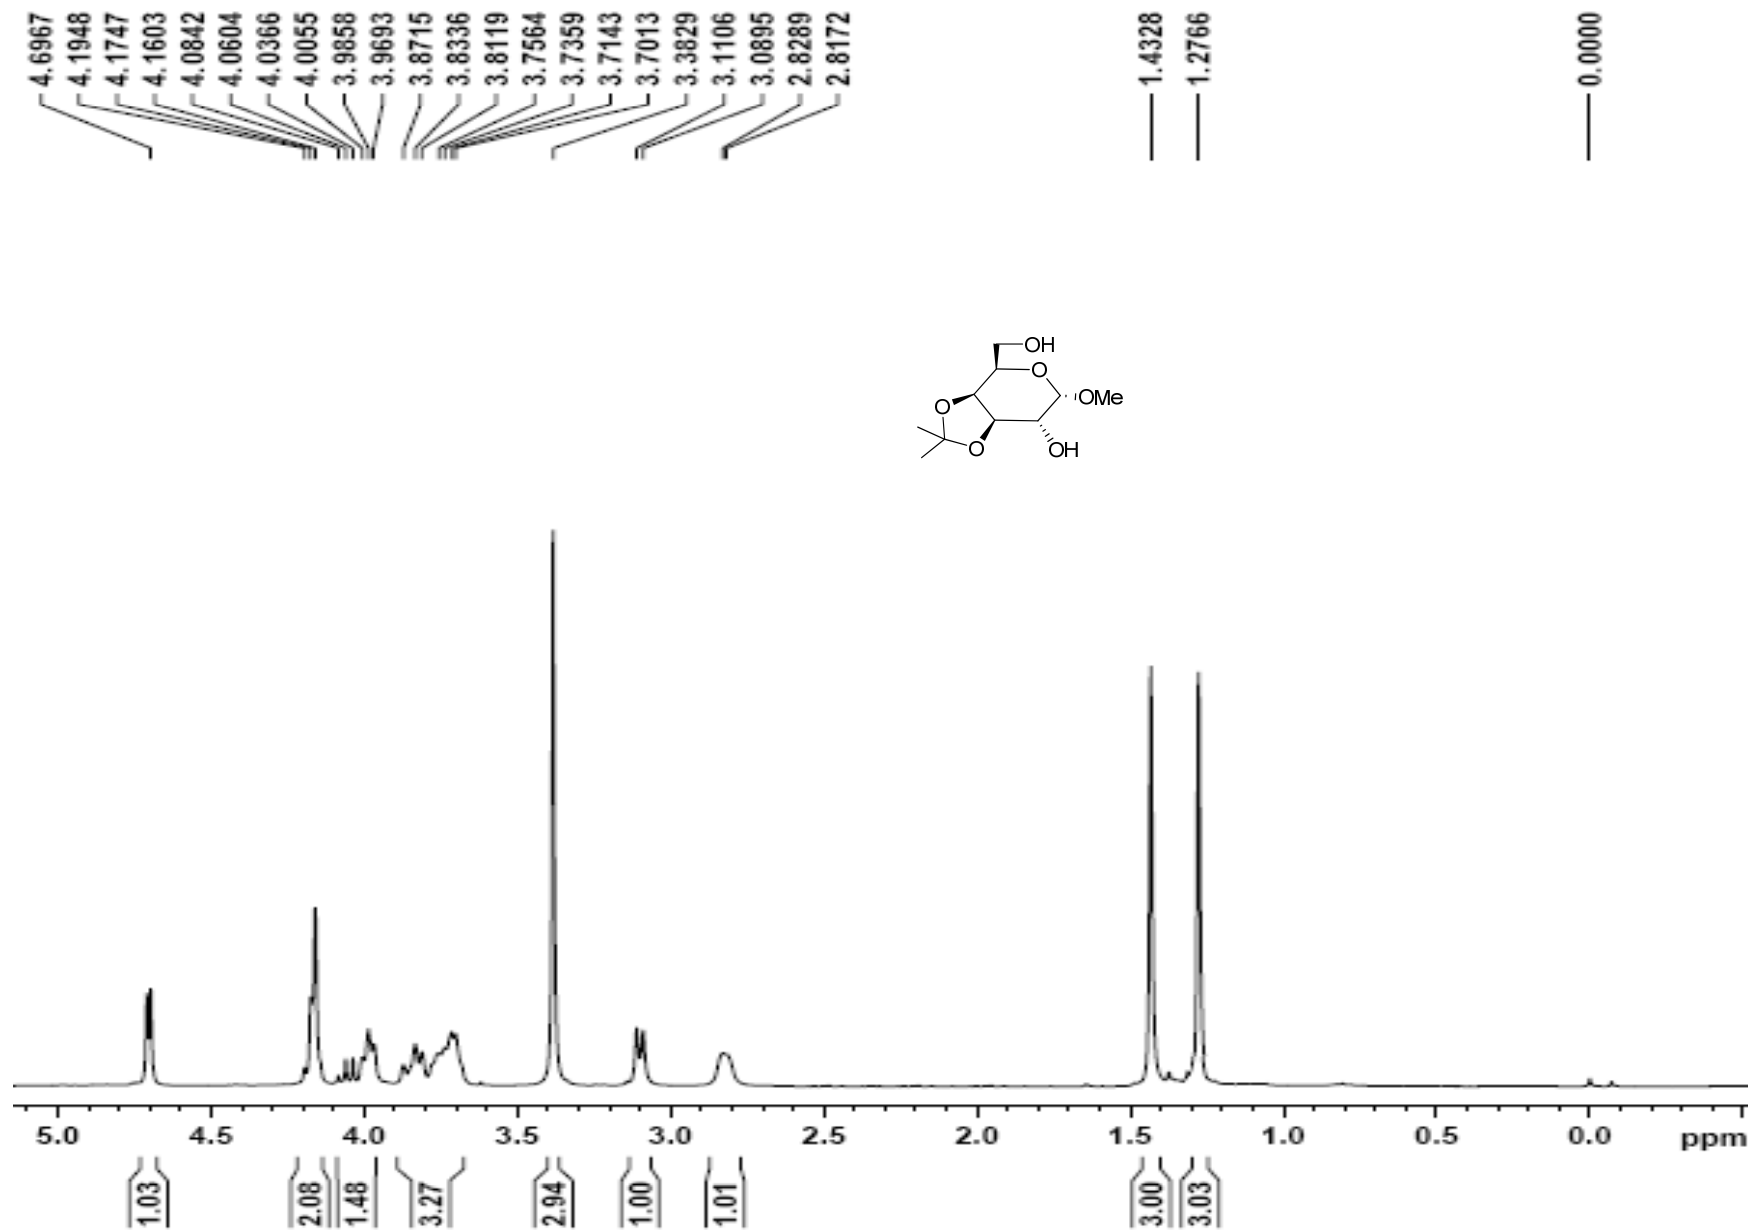

**Figure 9** <sup>1</sup>H NMR spectrum of compound 13

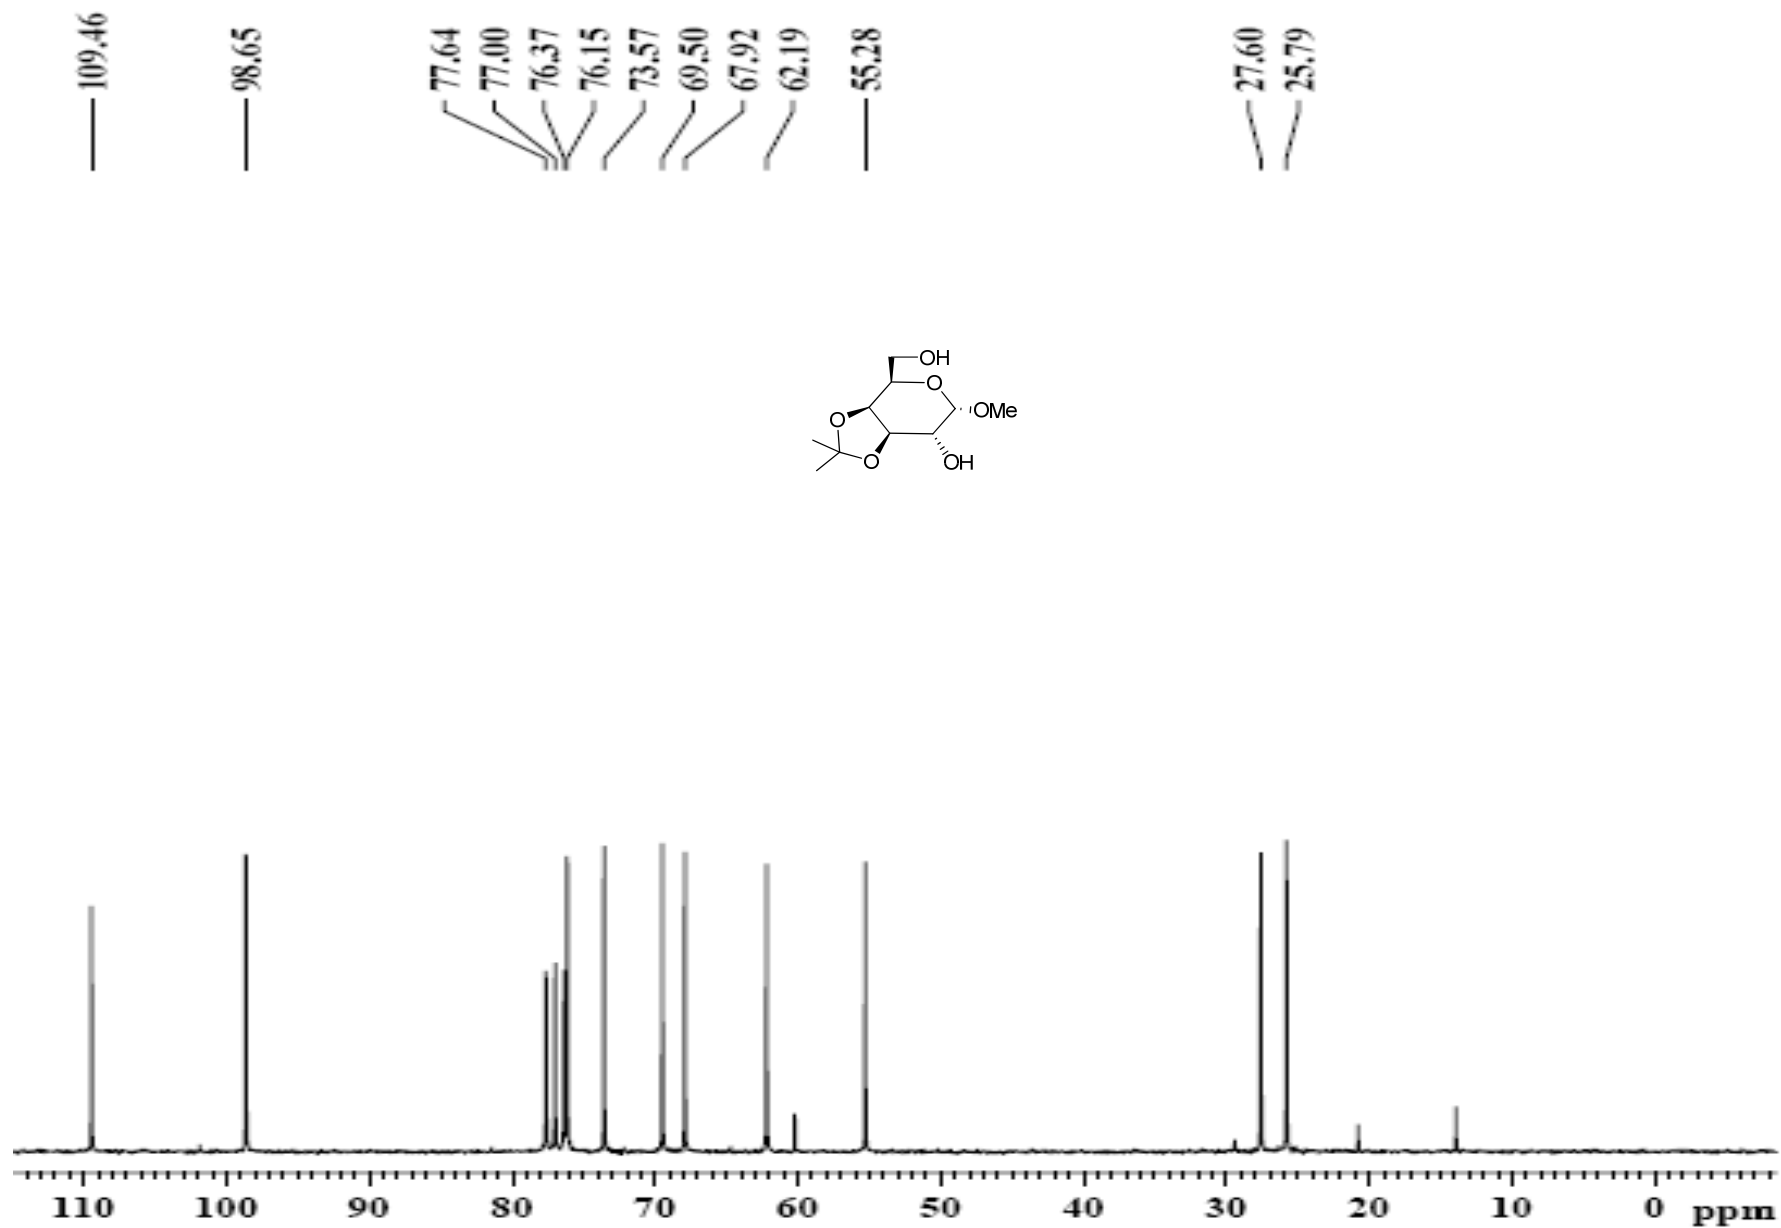

Figure 10 <sup>13</sup>C NMR spectrum of compound 13

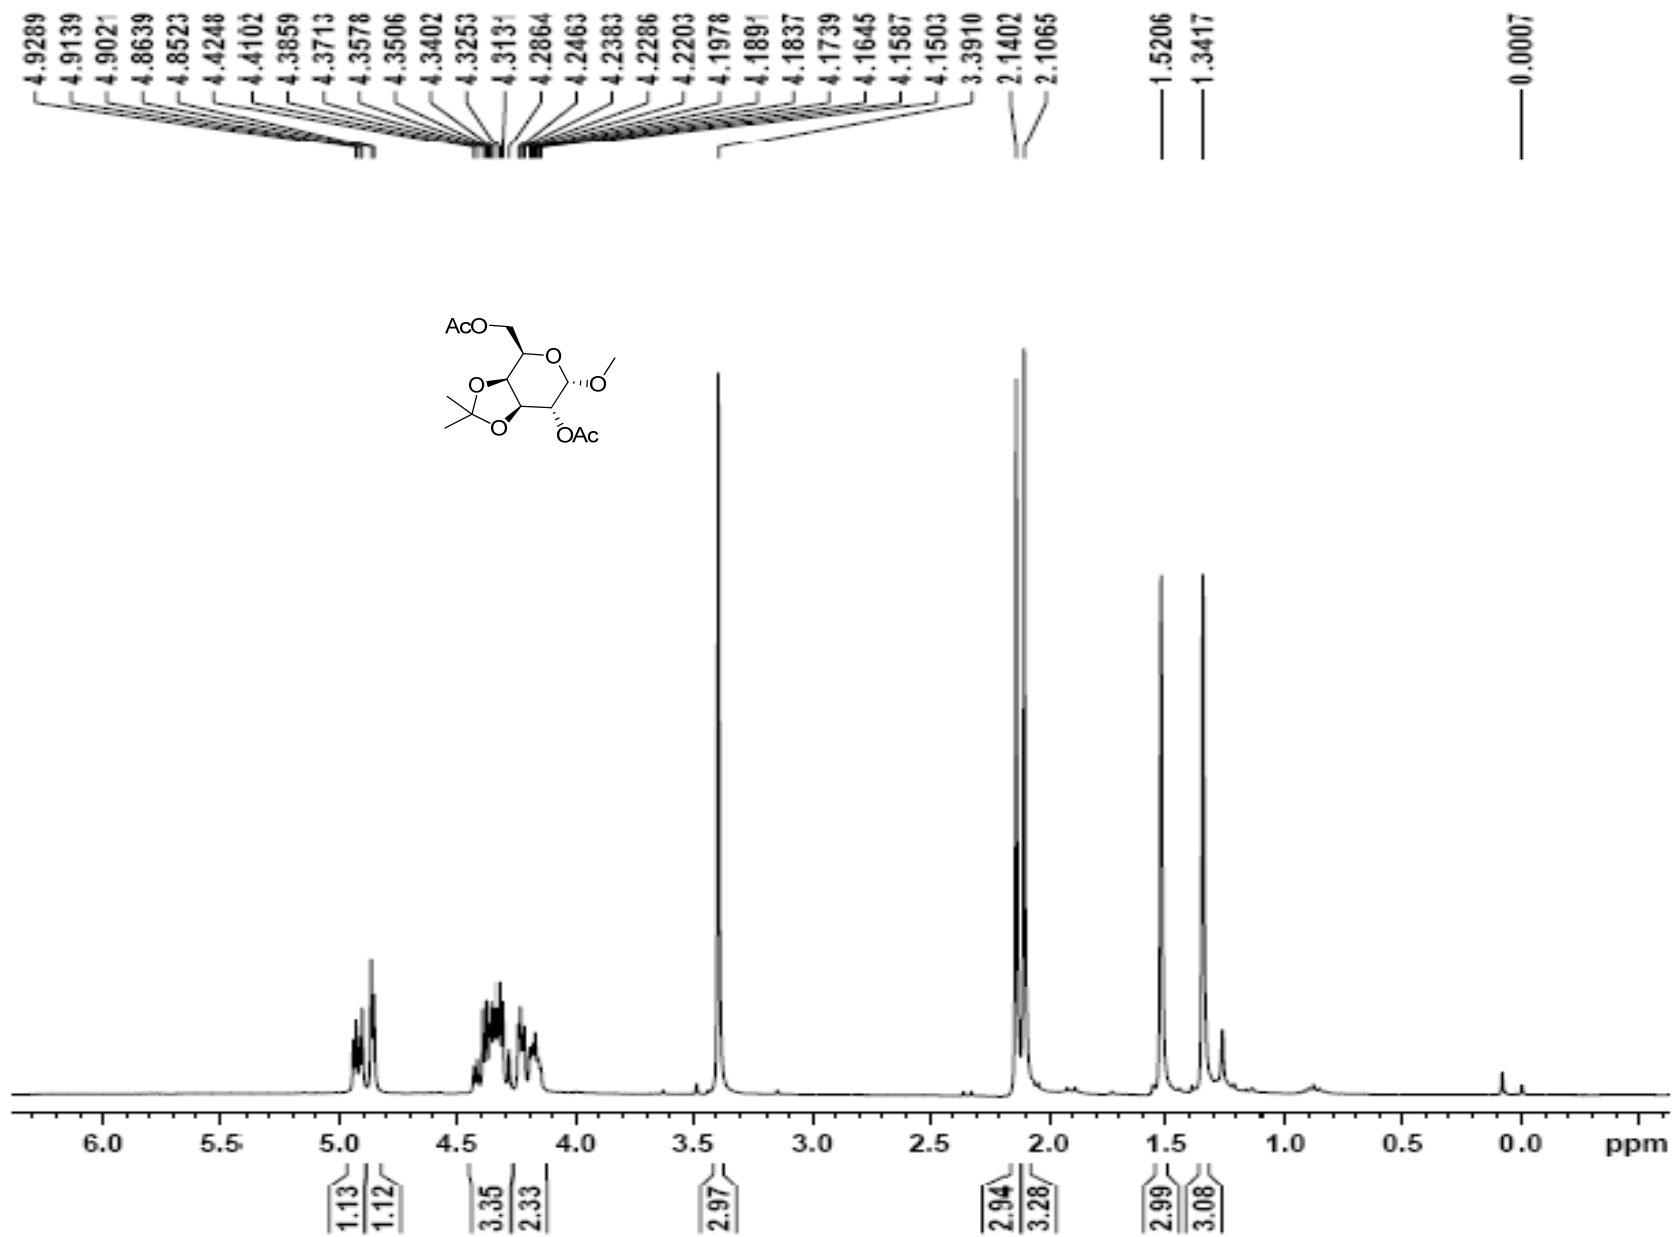

Figure 11 <sup>1</sup>H NMR spectrum of compound 14

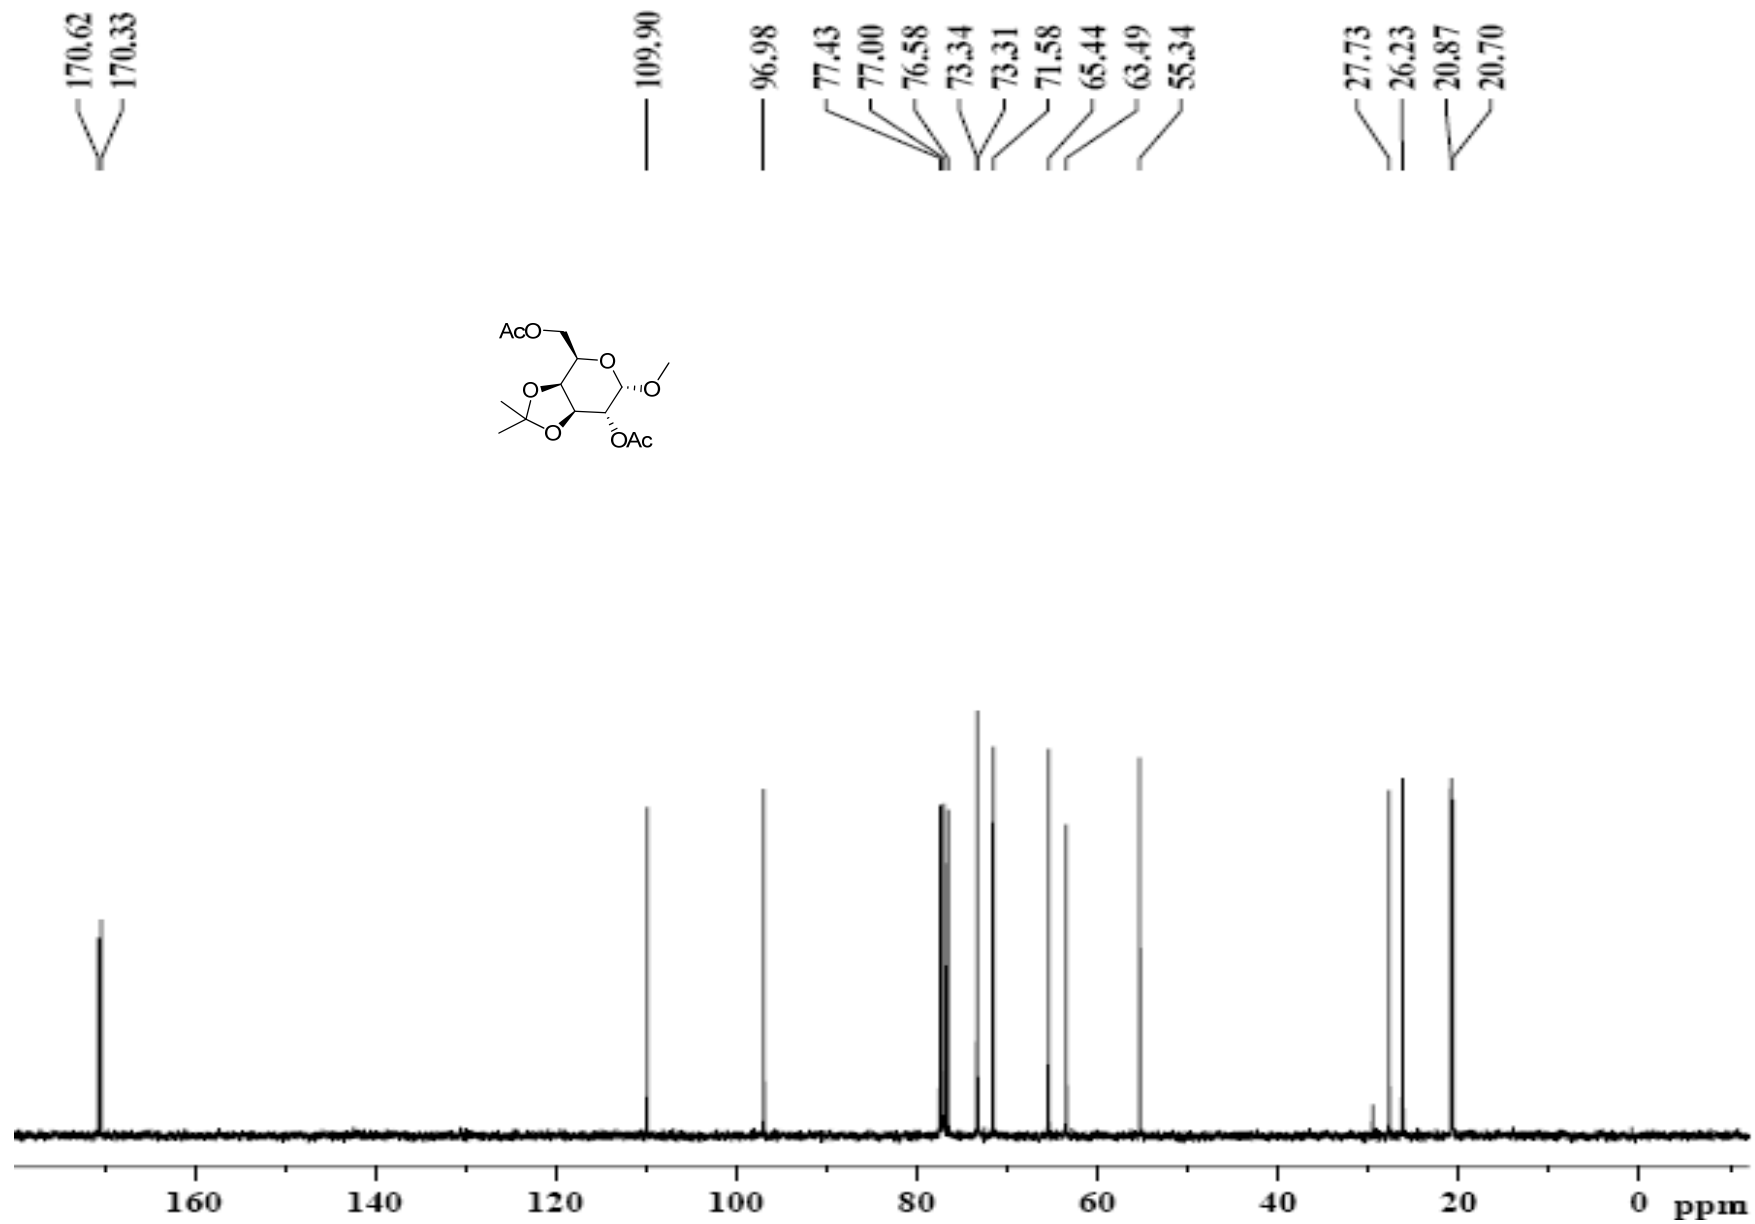

Figure 12  $^{13}\text{C}$  NMR spectrum of compound 14

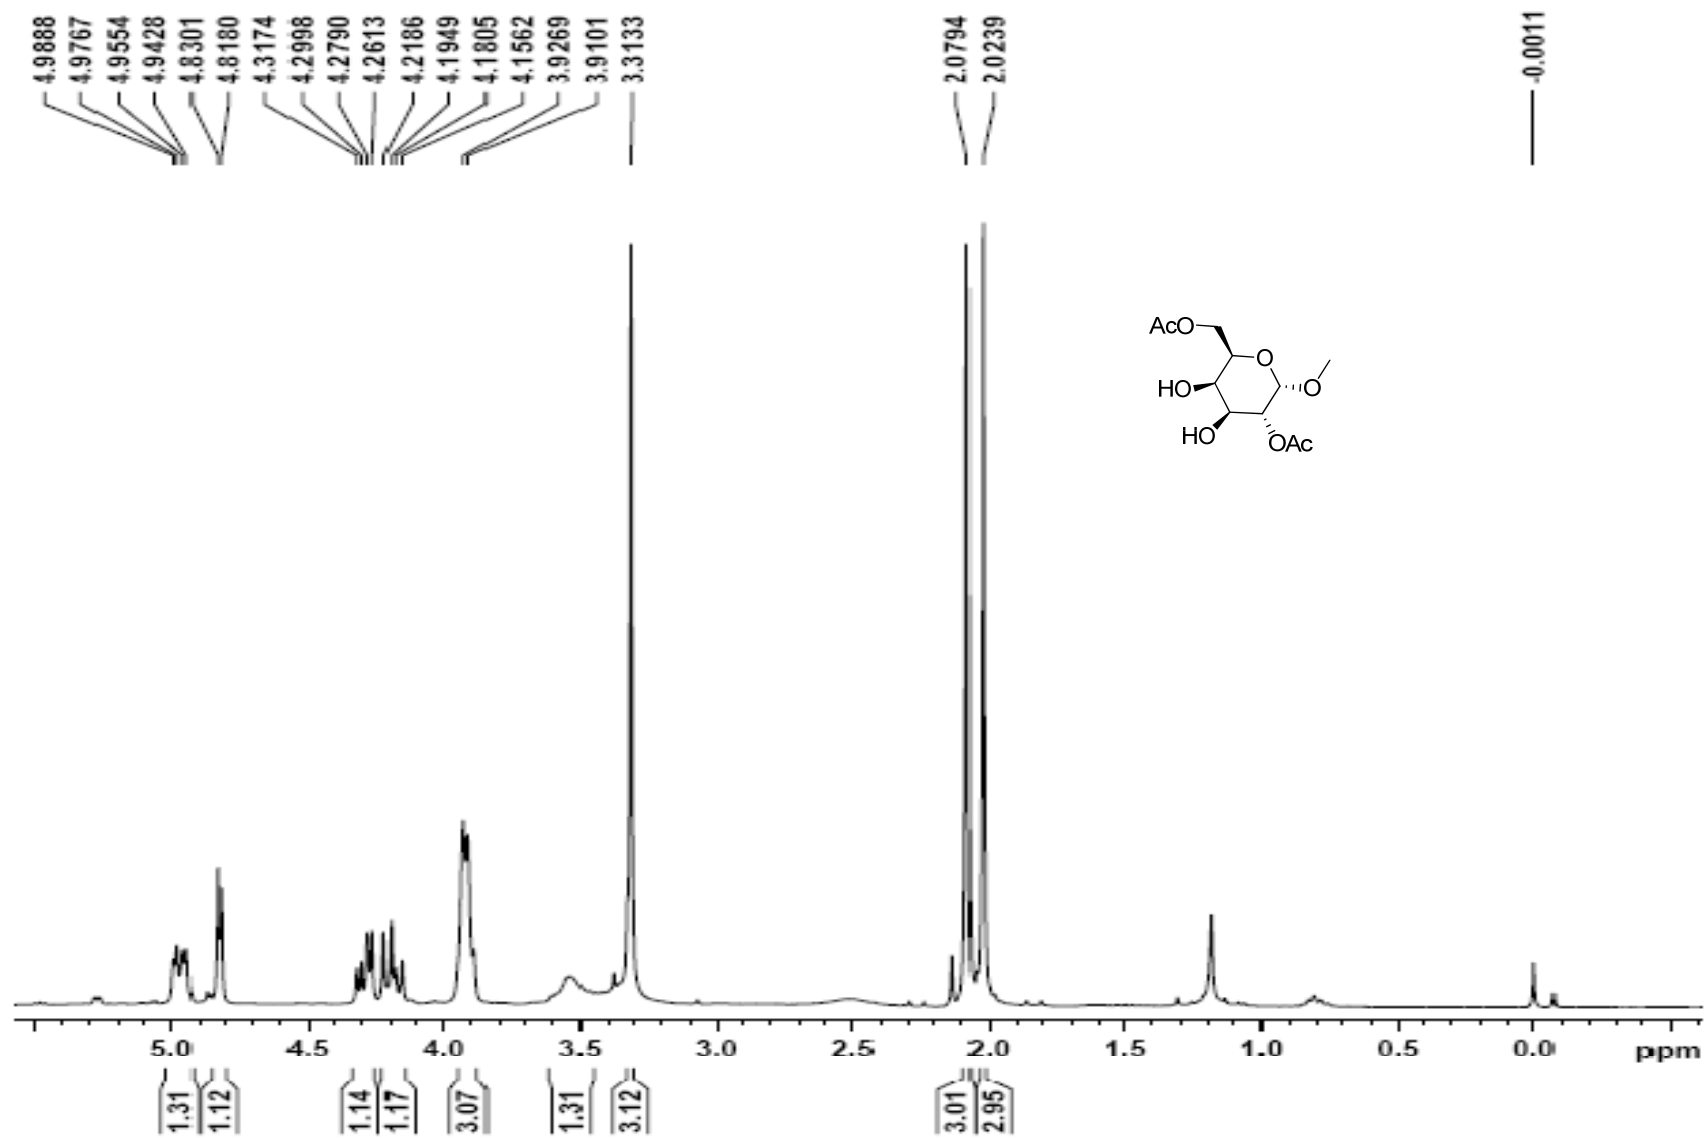

Figure 13  $^1\text{H}$  NMR spectrum of compound 15

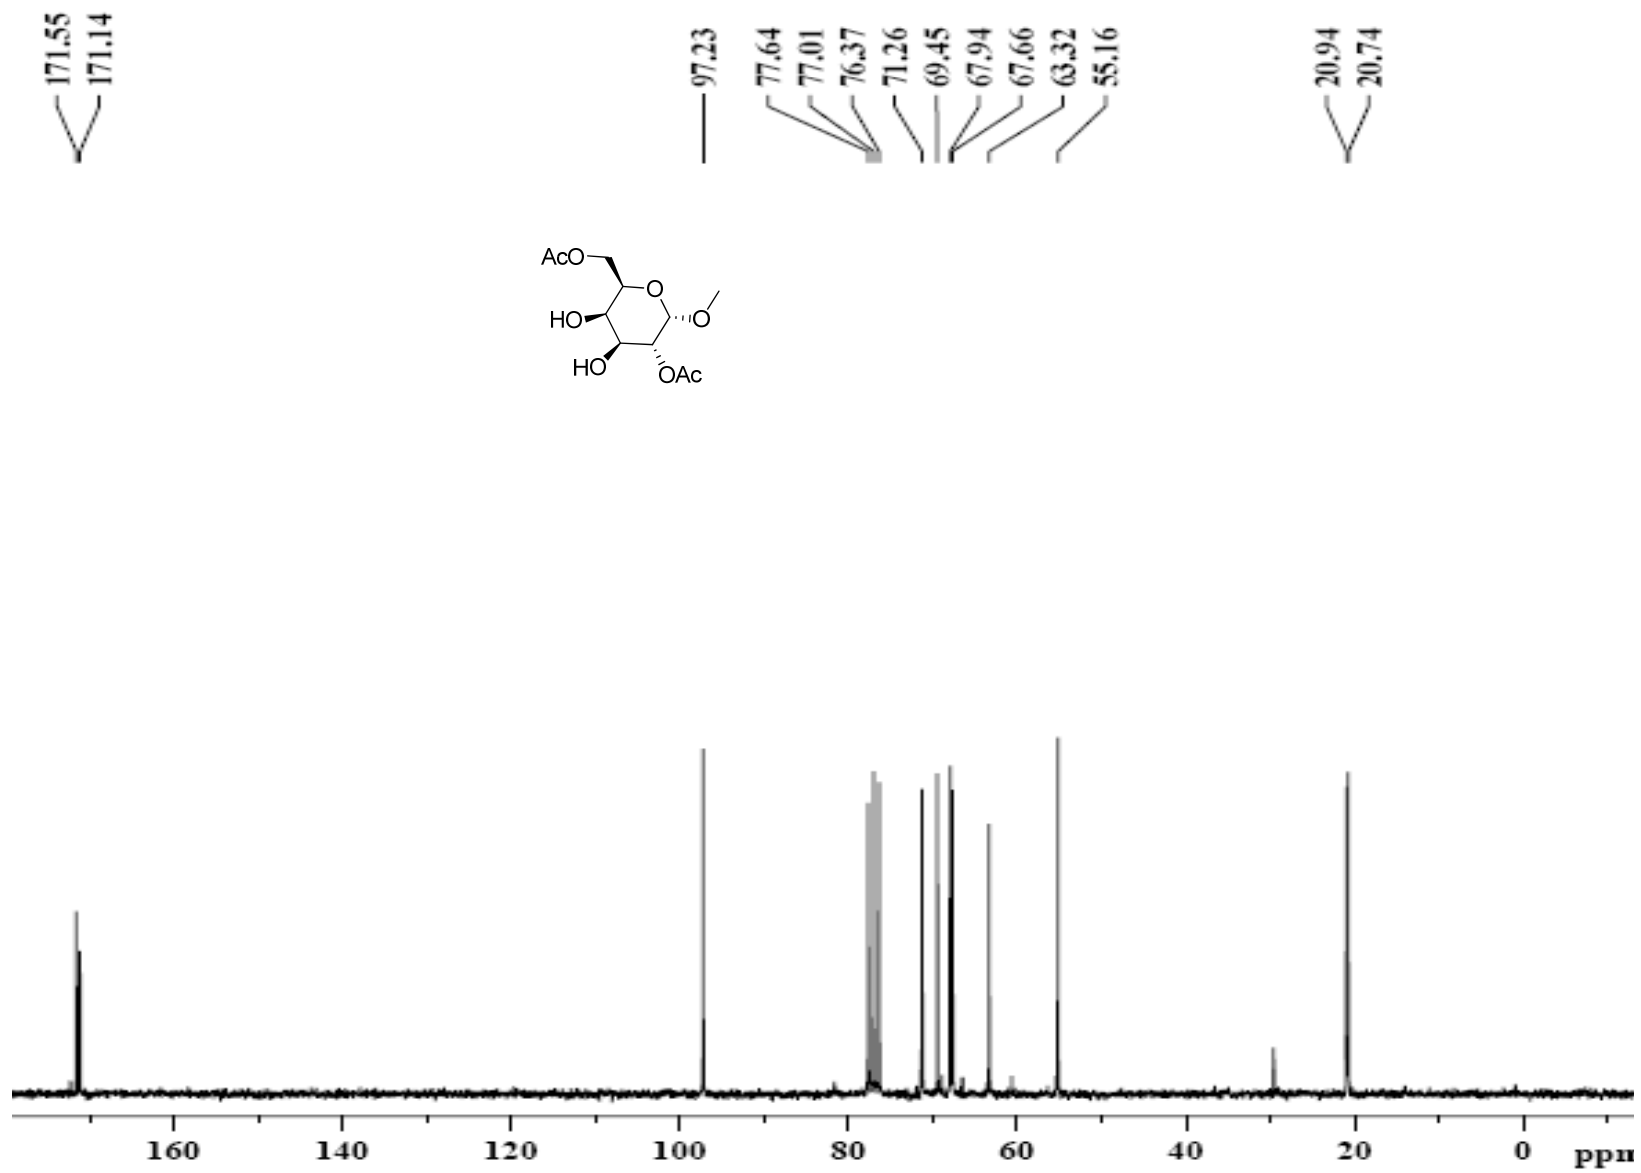

**Figure 14**  $^{13}\text{C}$  NMR spectrum of compound **15**

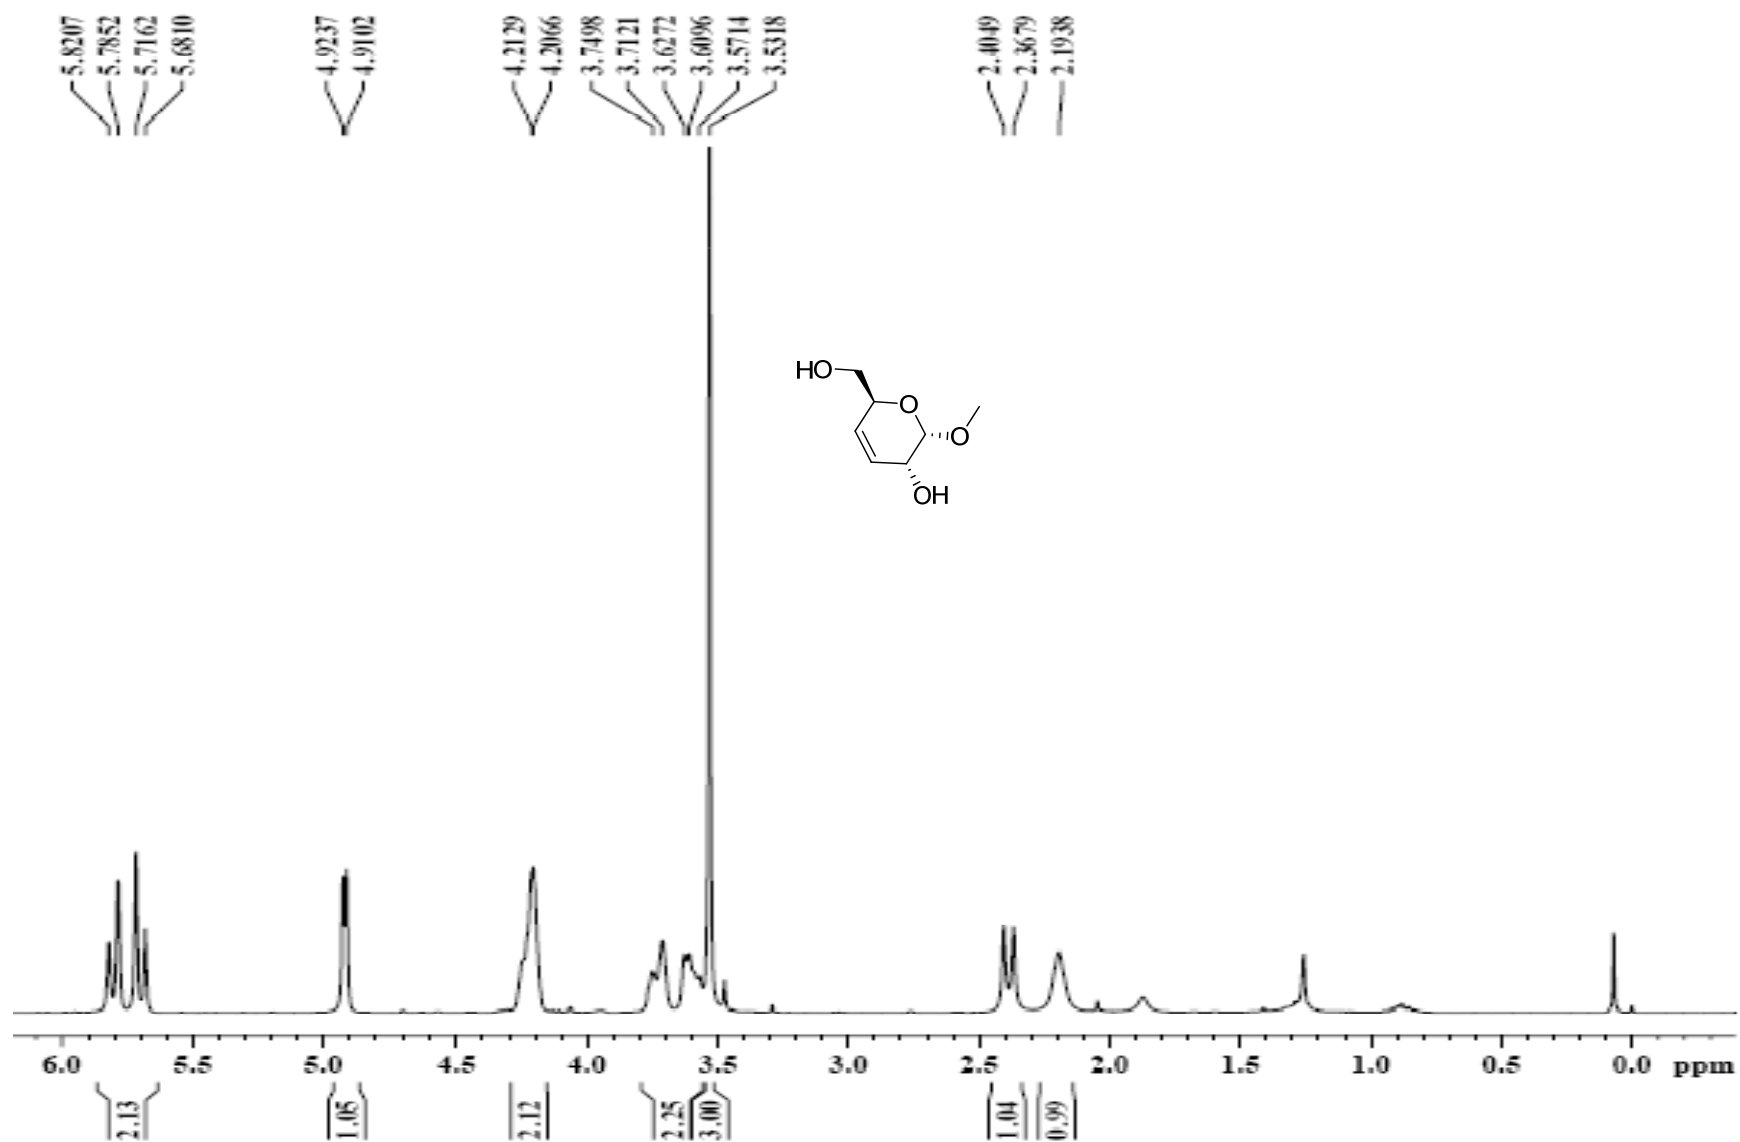

Figure 15 <sup>1</sup>H NMR spectrum of compound 17



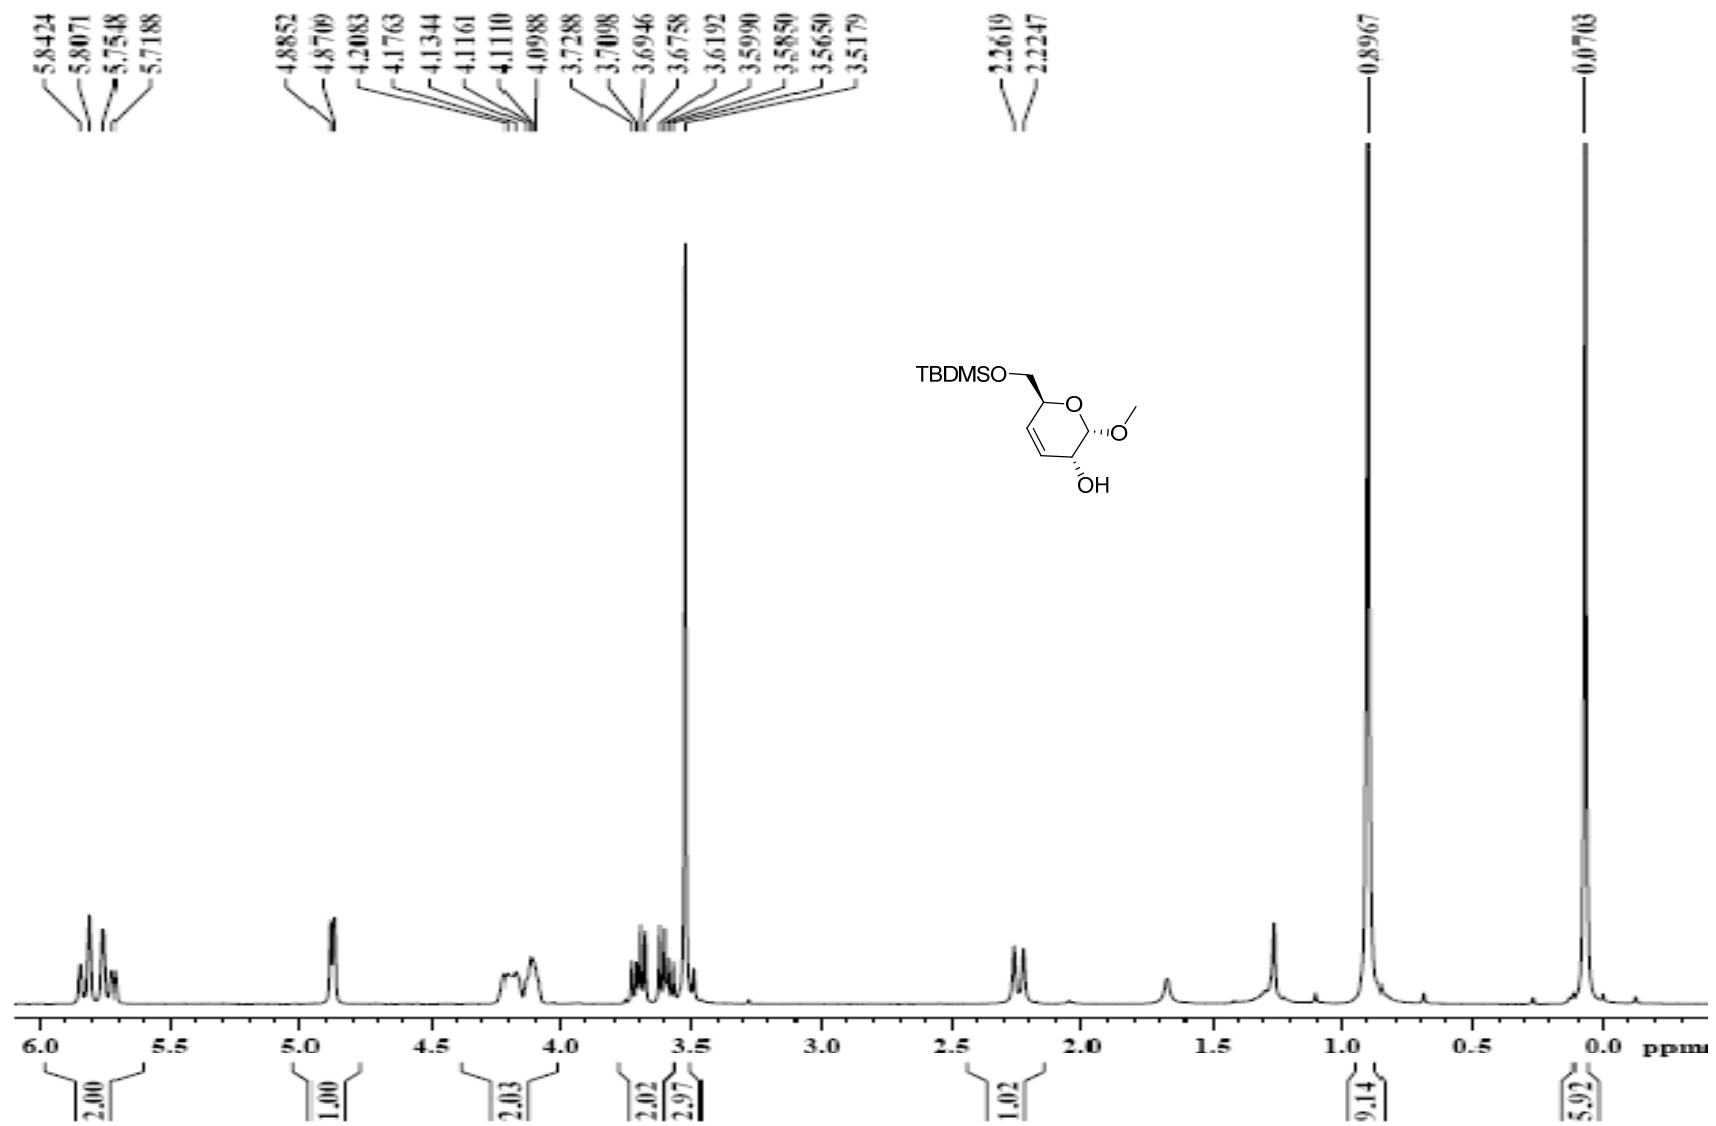

Figure 16  $^1\text{H}$  NMR spectrum of compound 18

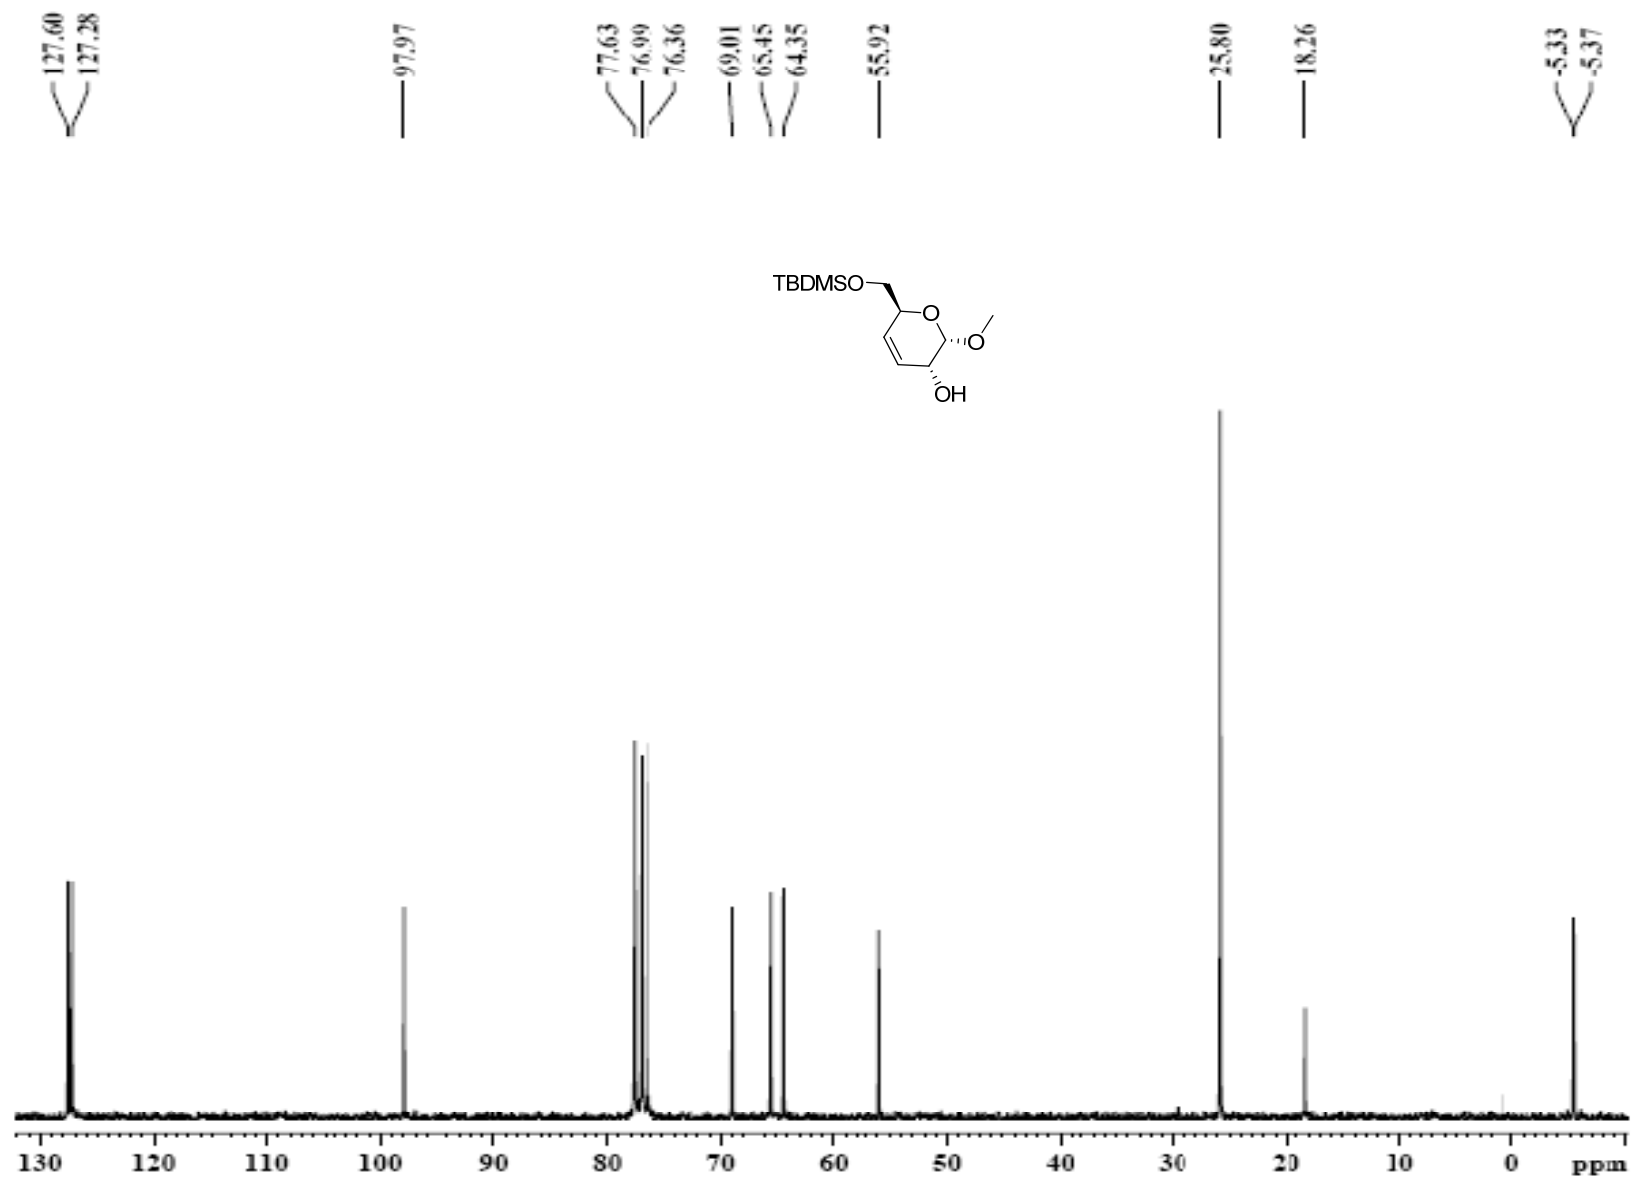

Figure 17 <sup>13</sup>C NMR spectrum of compound **18**

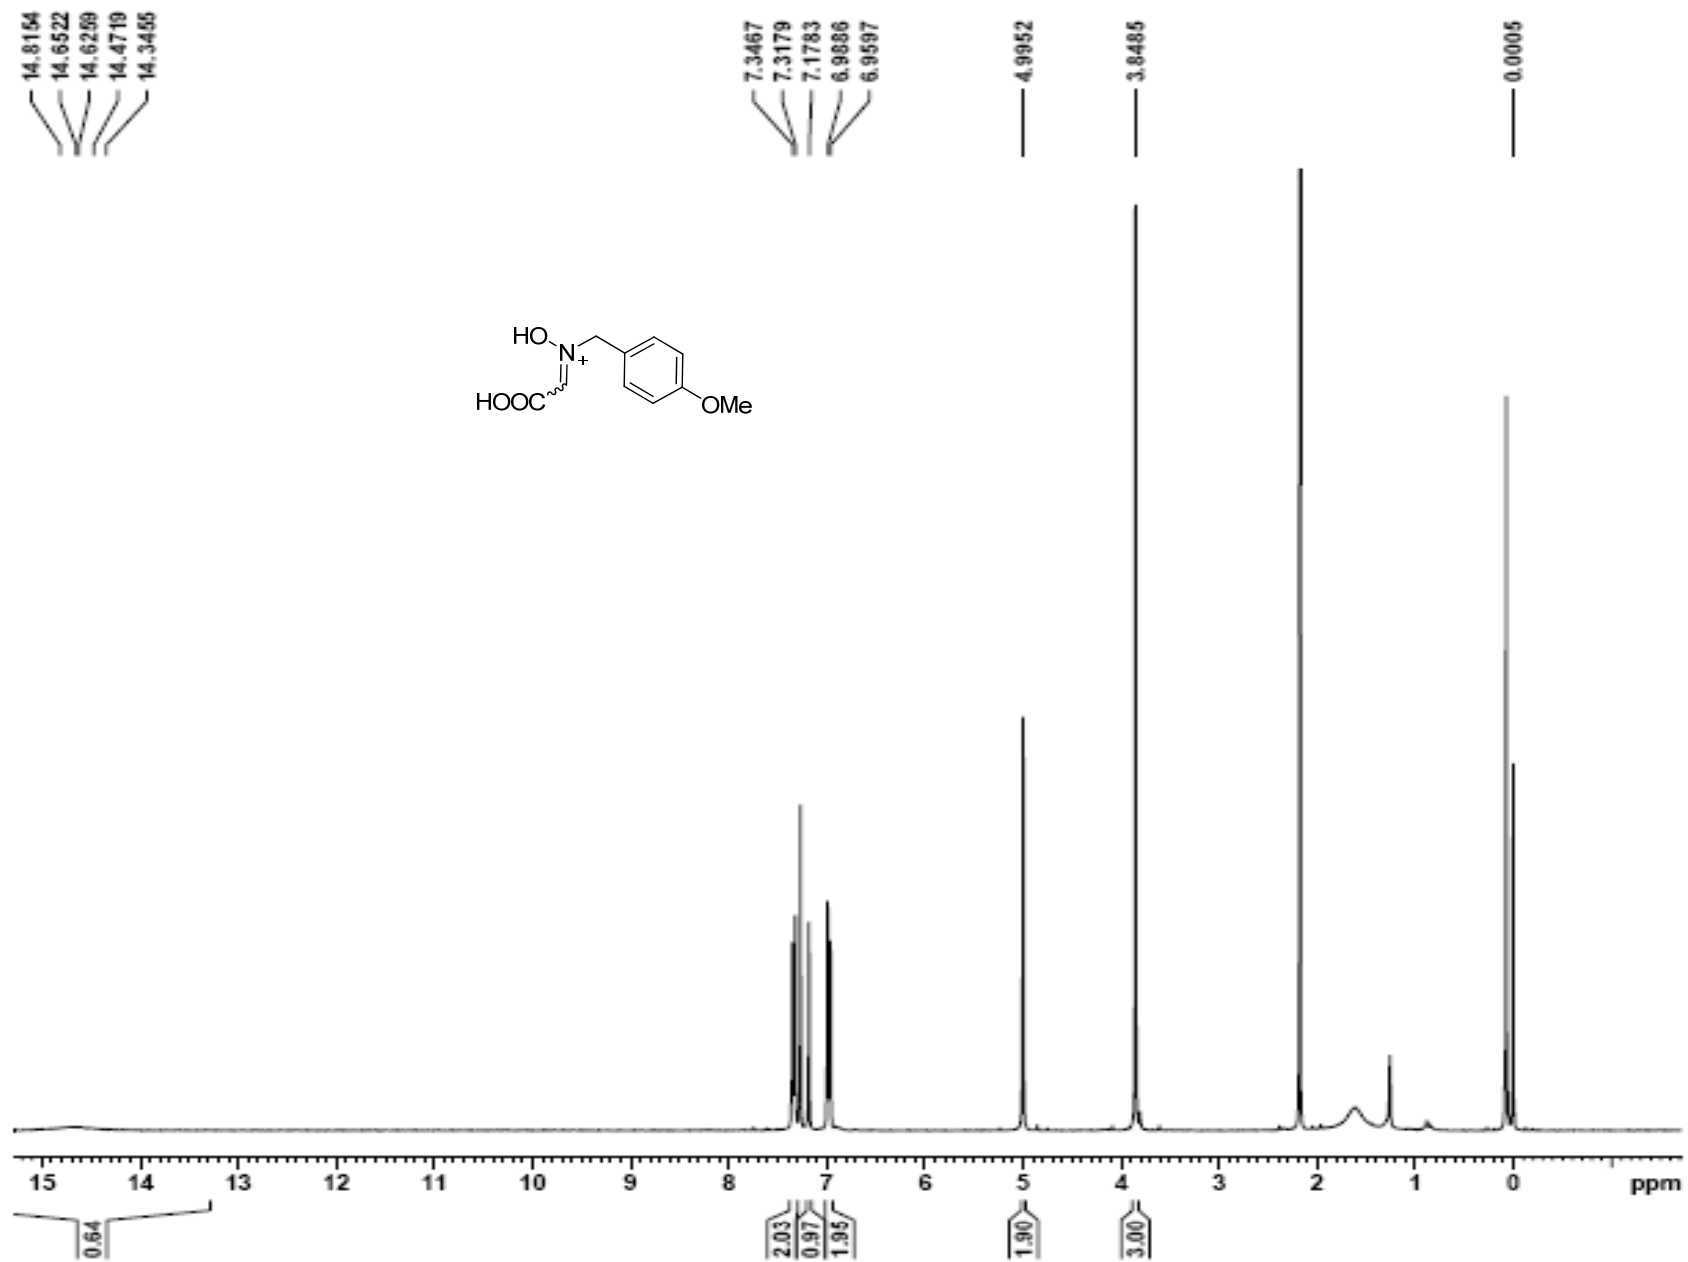

**Figure 18** <sup>1</sup>H NMR spectrum of compound **11**

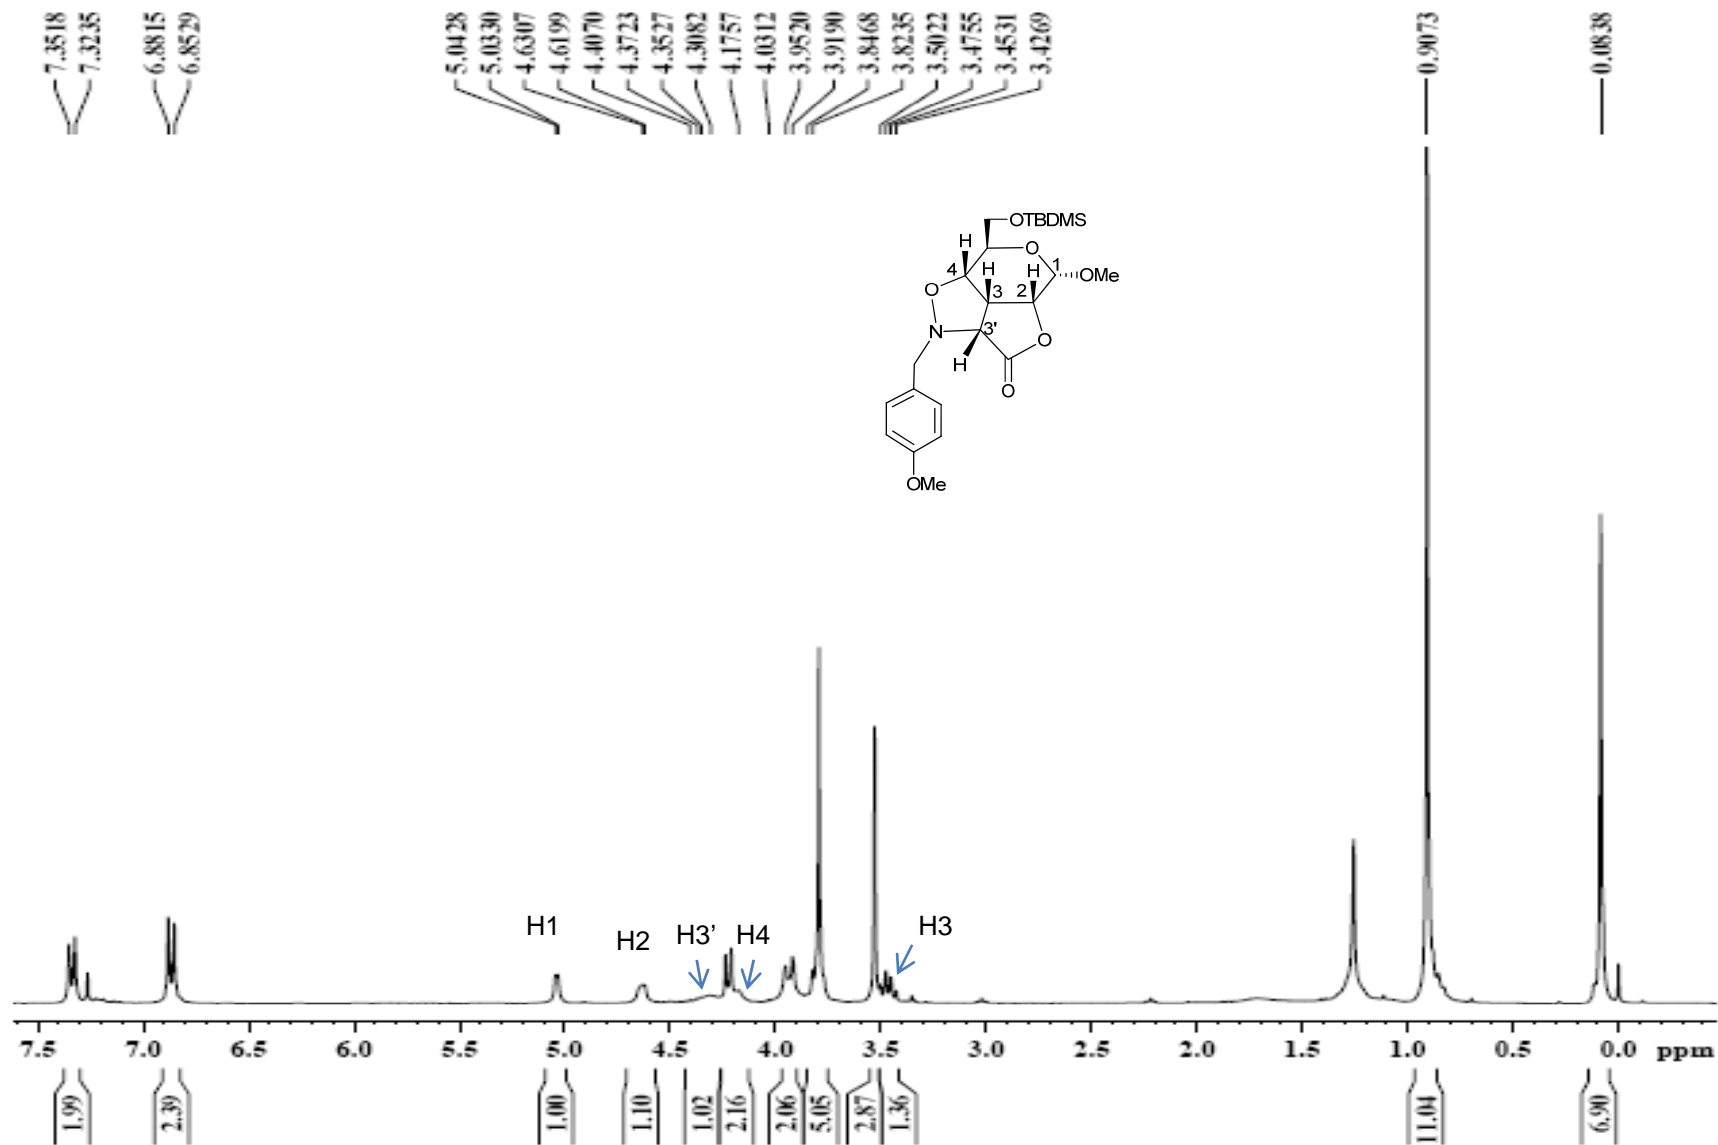

Figure 19 <sup>1</sup>H NMR spectrum of compound 19

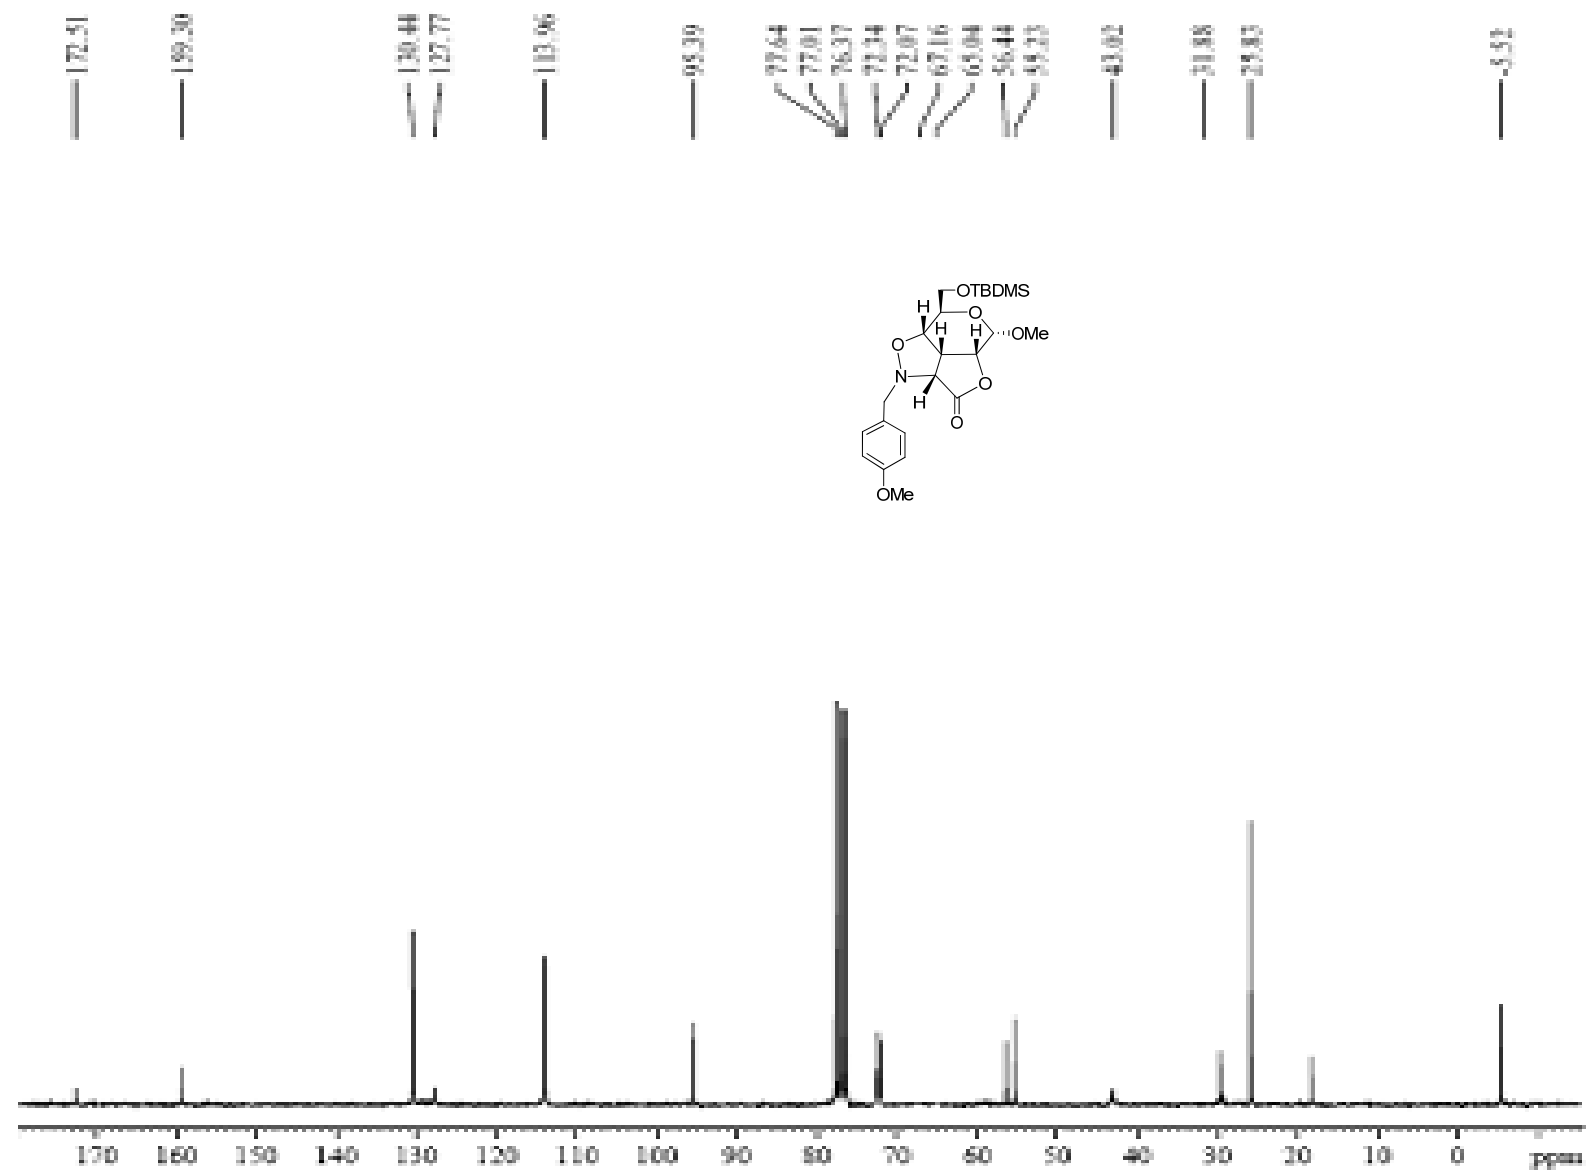

**Figure 20** <sup>13</sup>C NMR spectrum of compound **19**

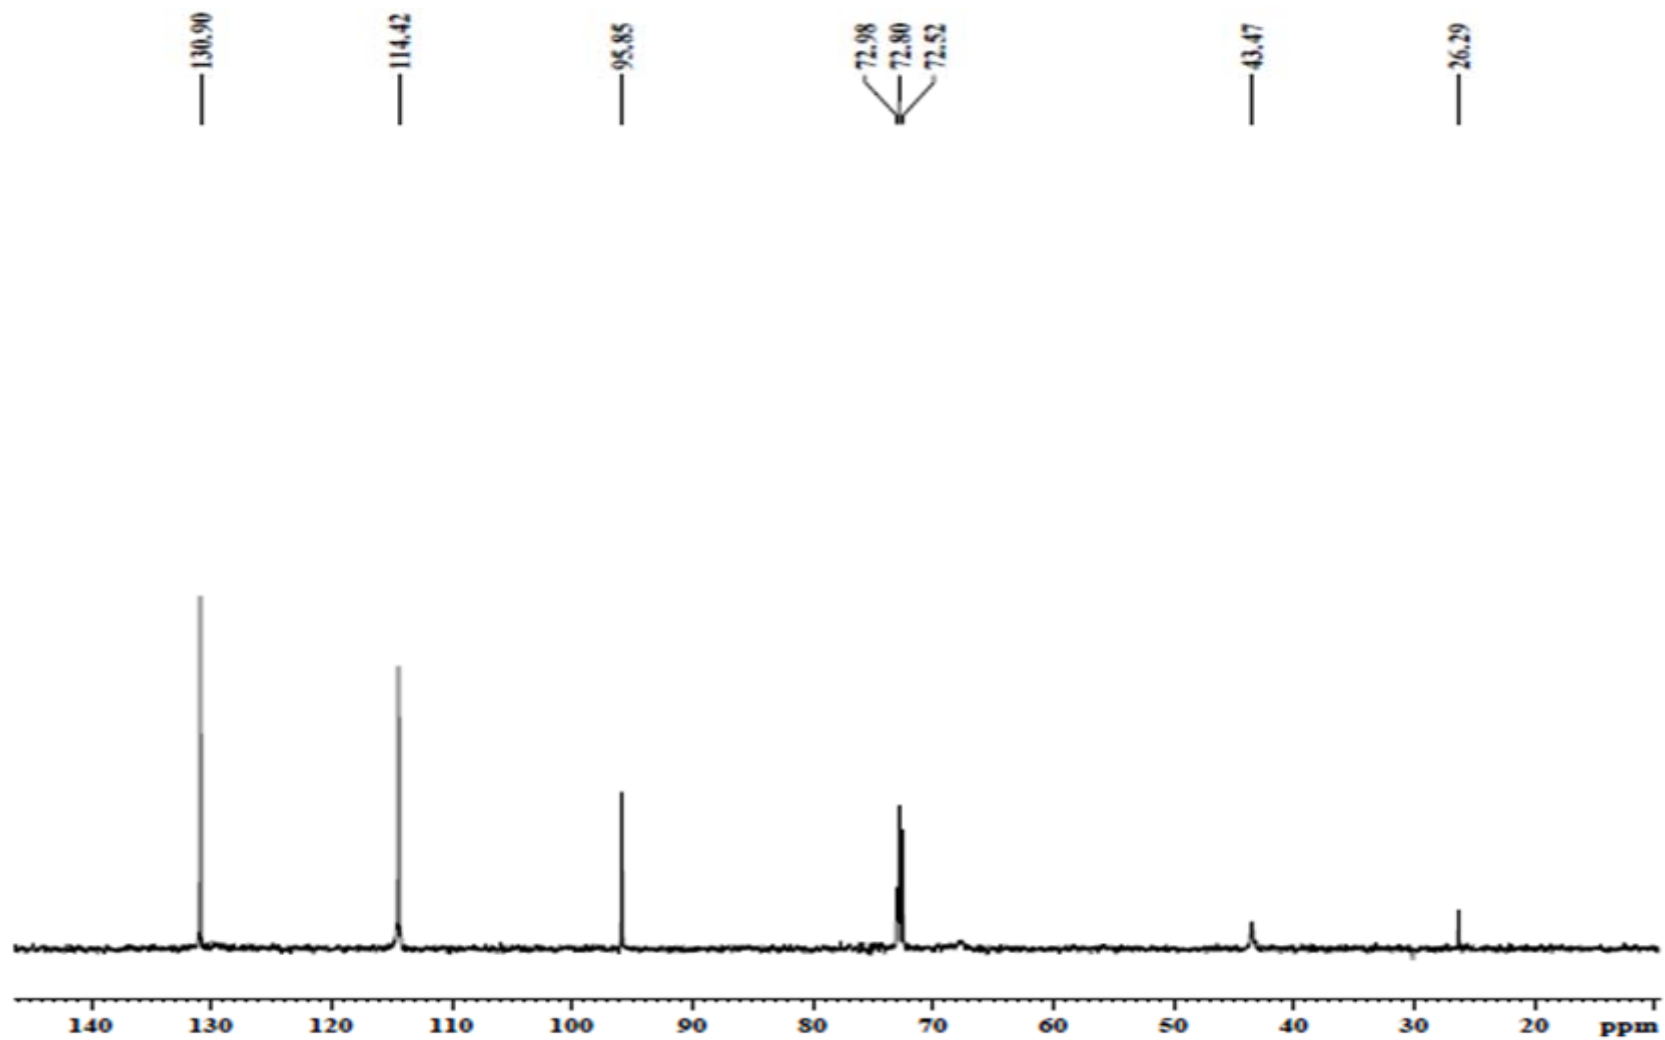

**Figure 21** DEPT 90 spectrum of compound **19**

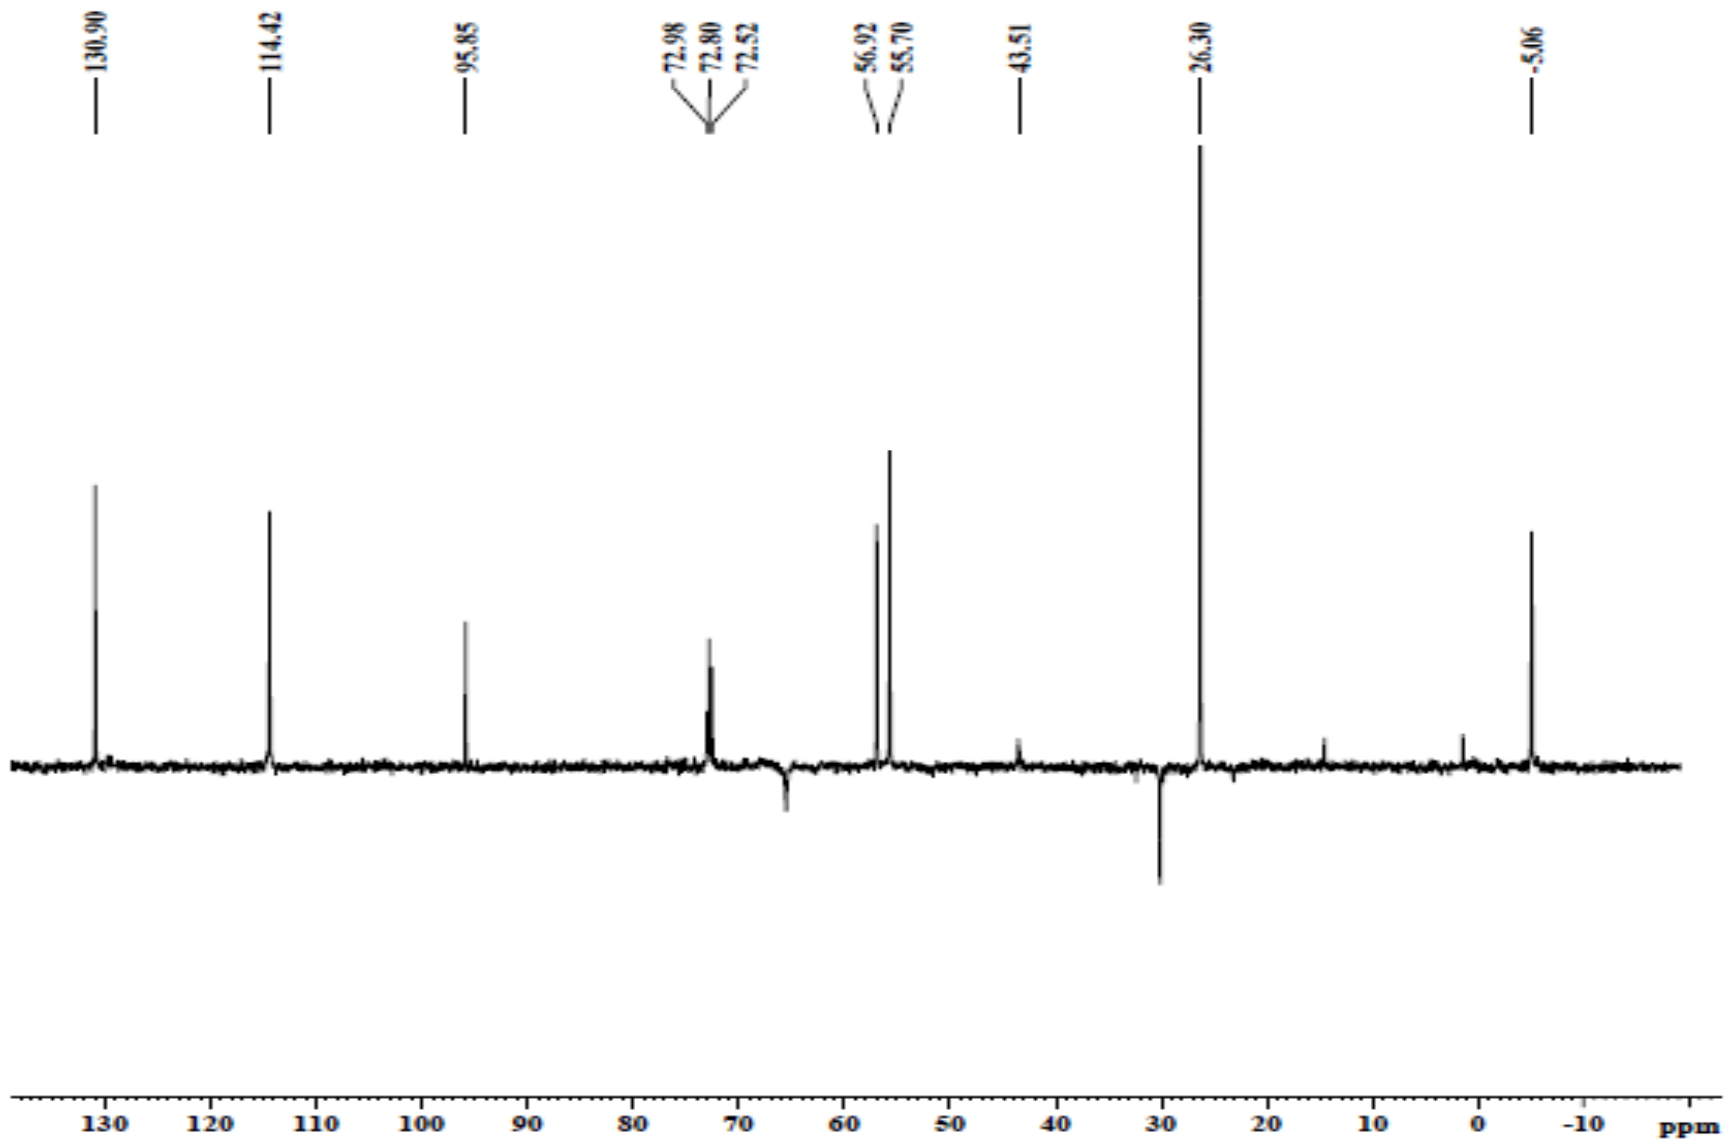

**Figure 22** DEPT 135 spectrum of compound **19**

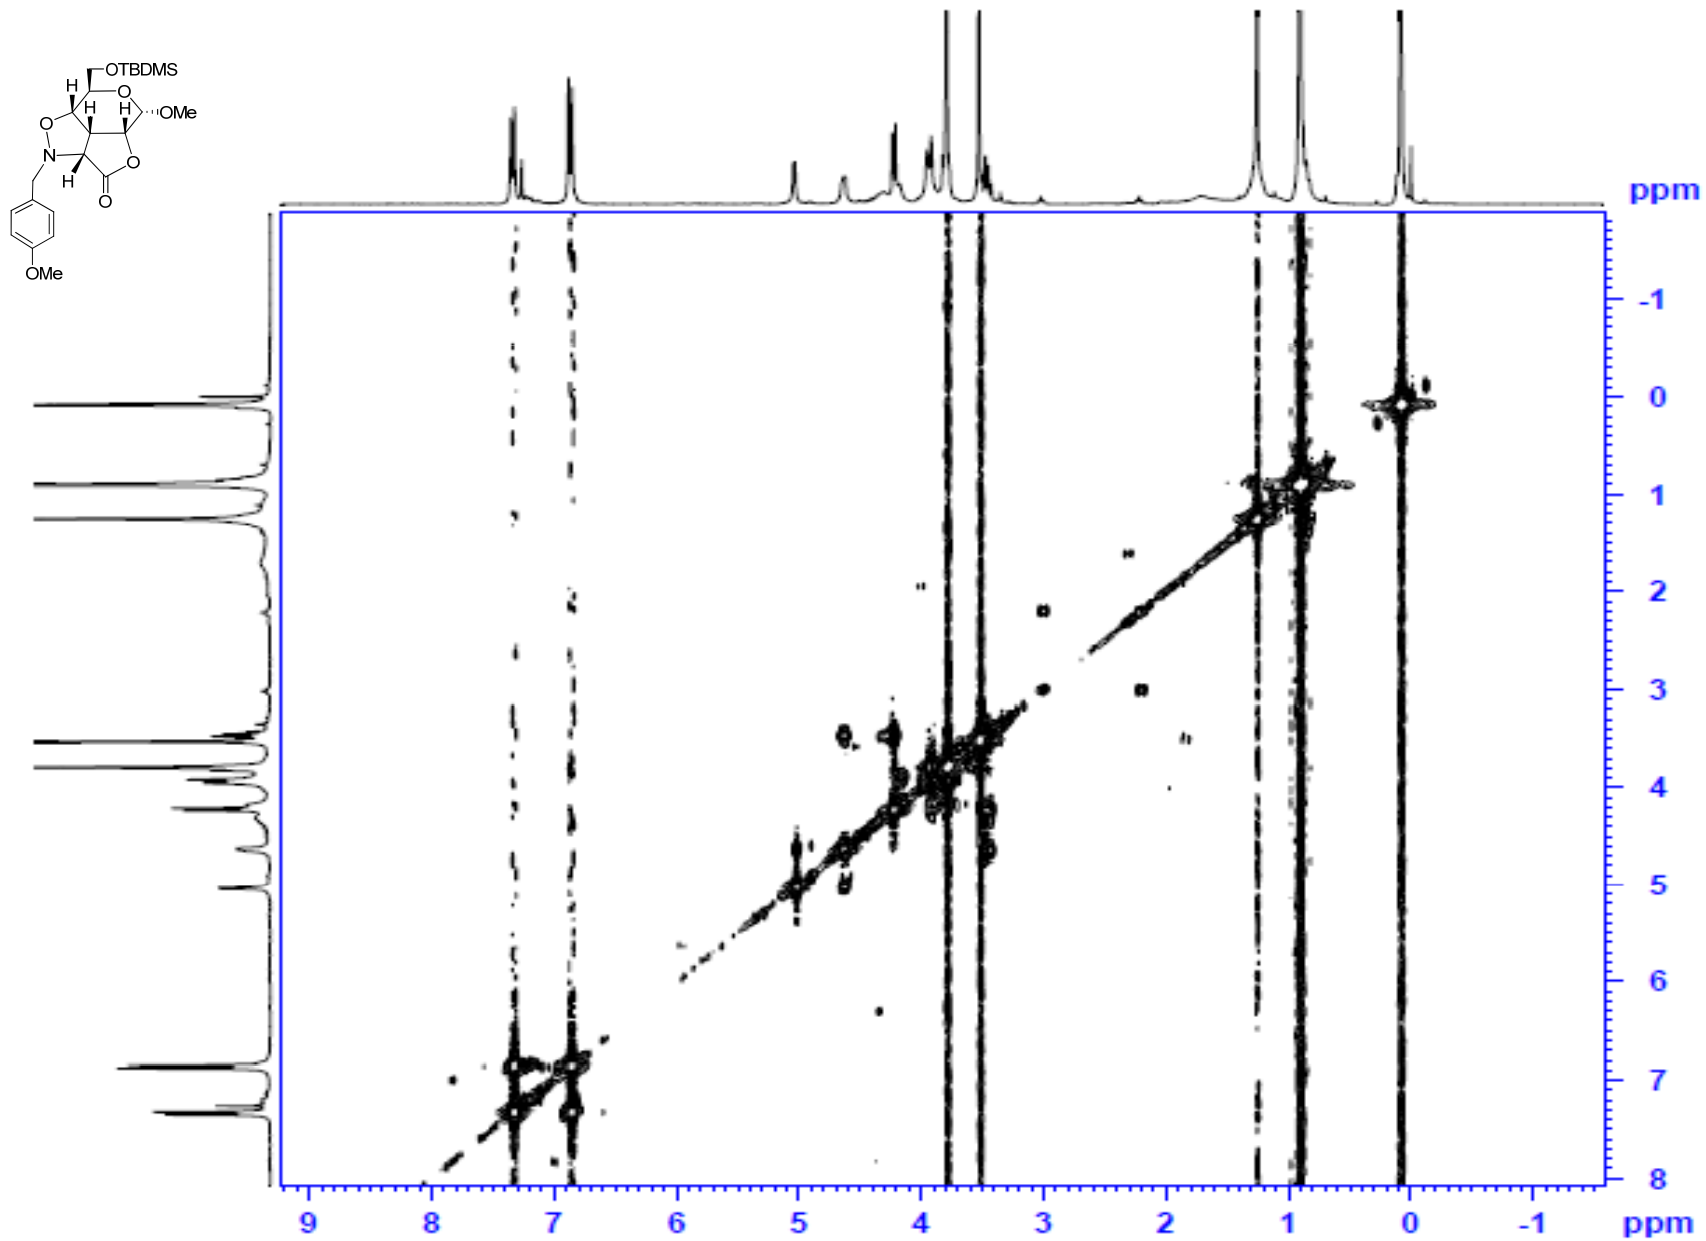

**Figure 23** COSY spectrum of compound **19**



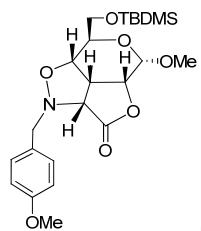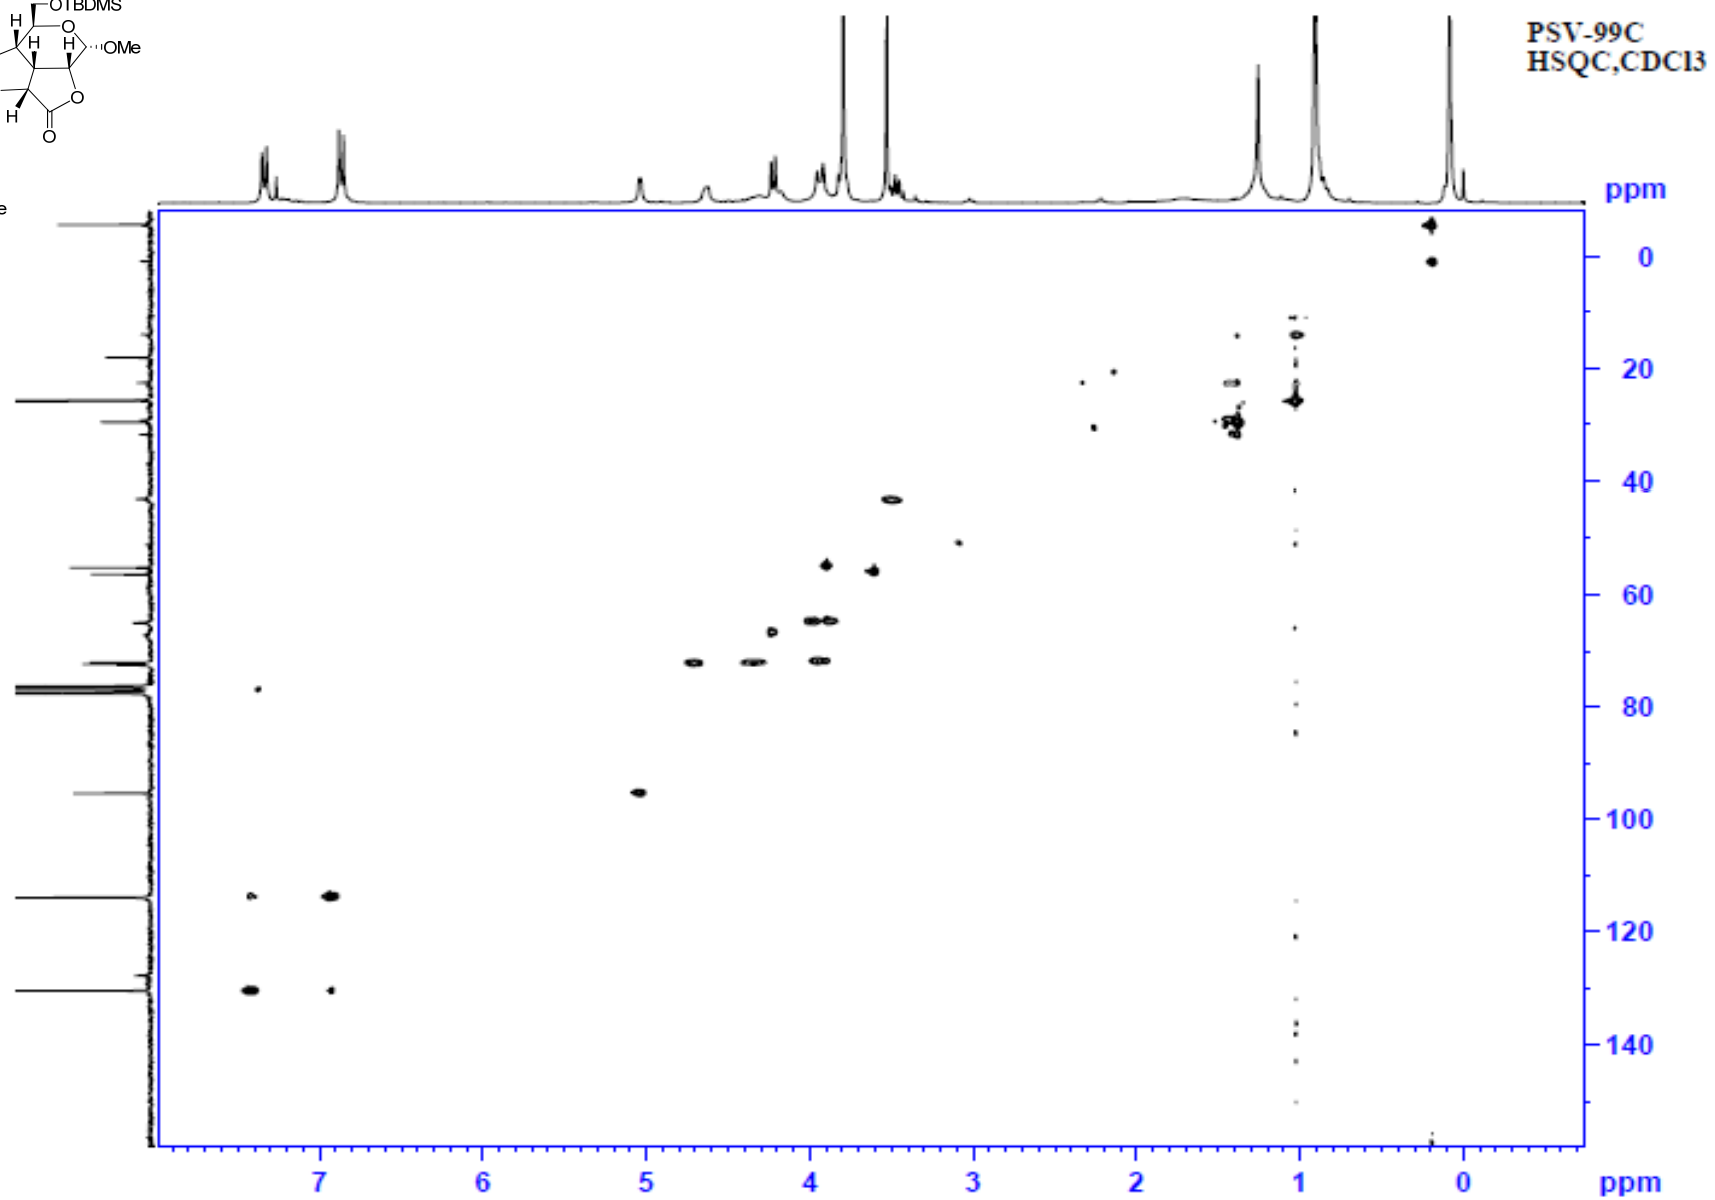

**Figure 24** HSQC spectrum of compound **19**

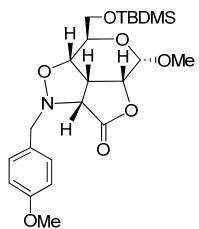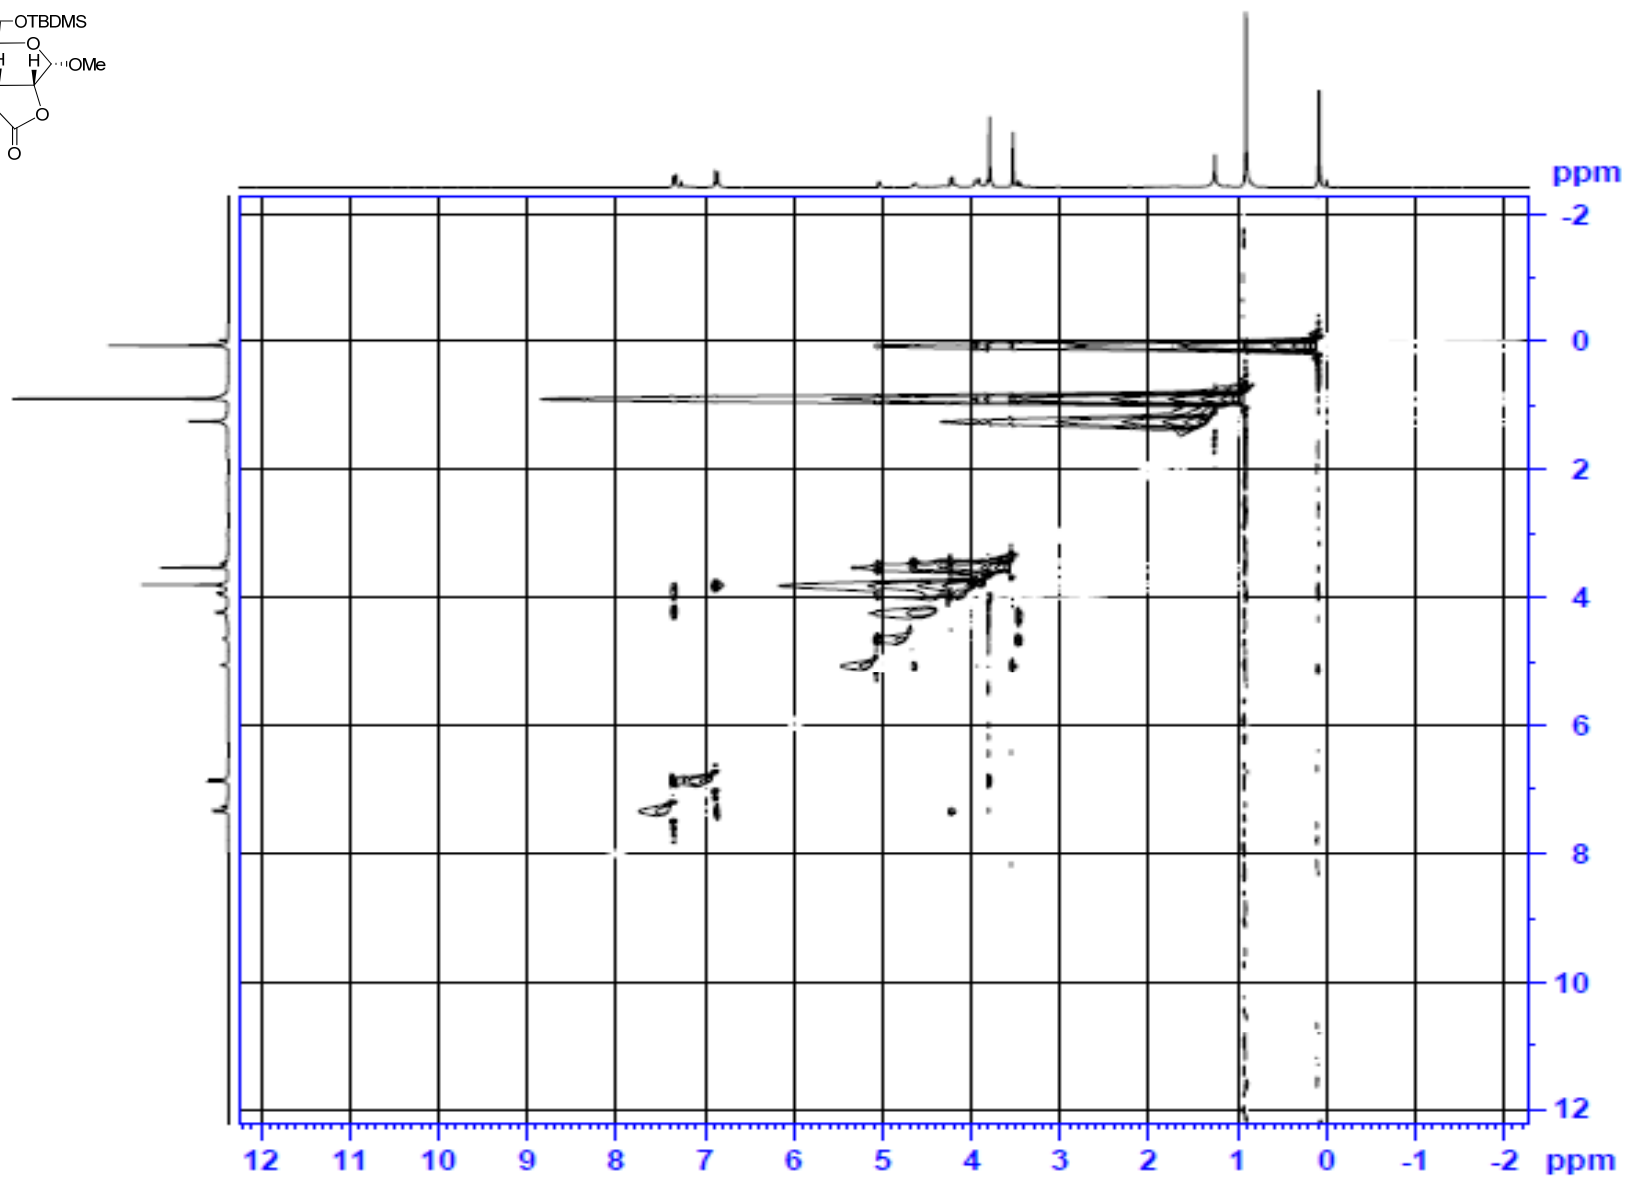

**Figure 25** NOESY spectrum of compound **19**

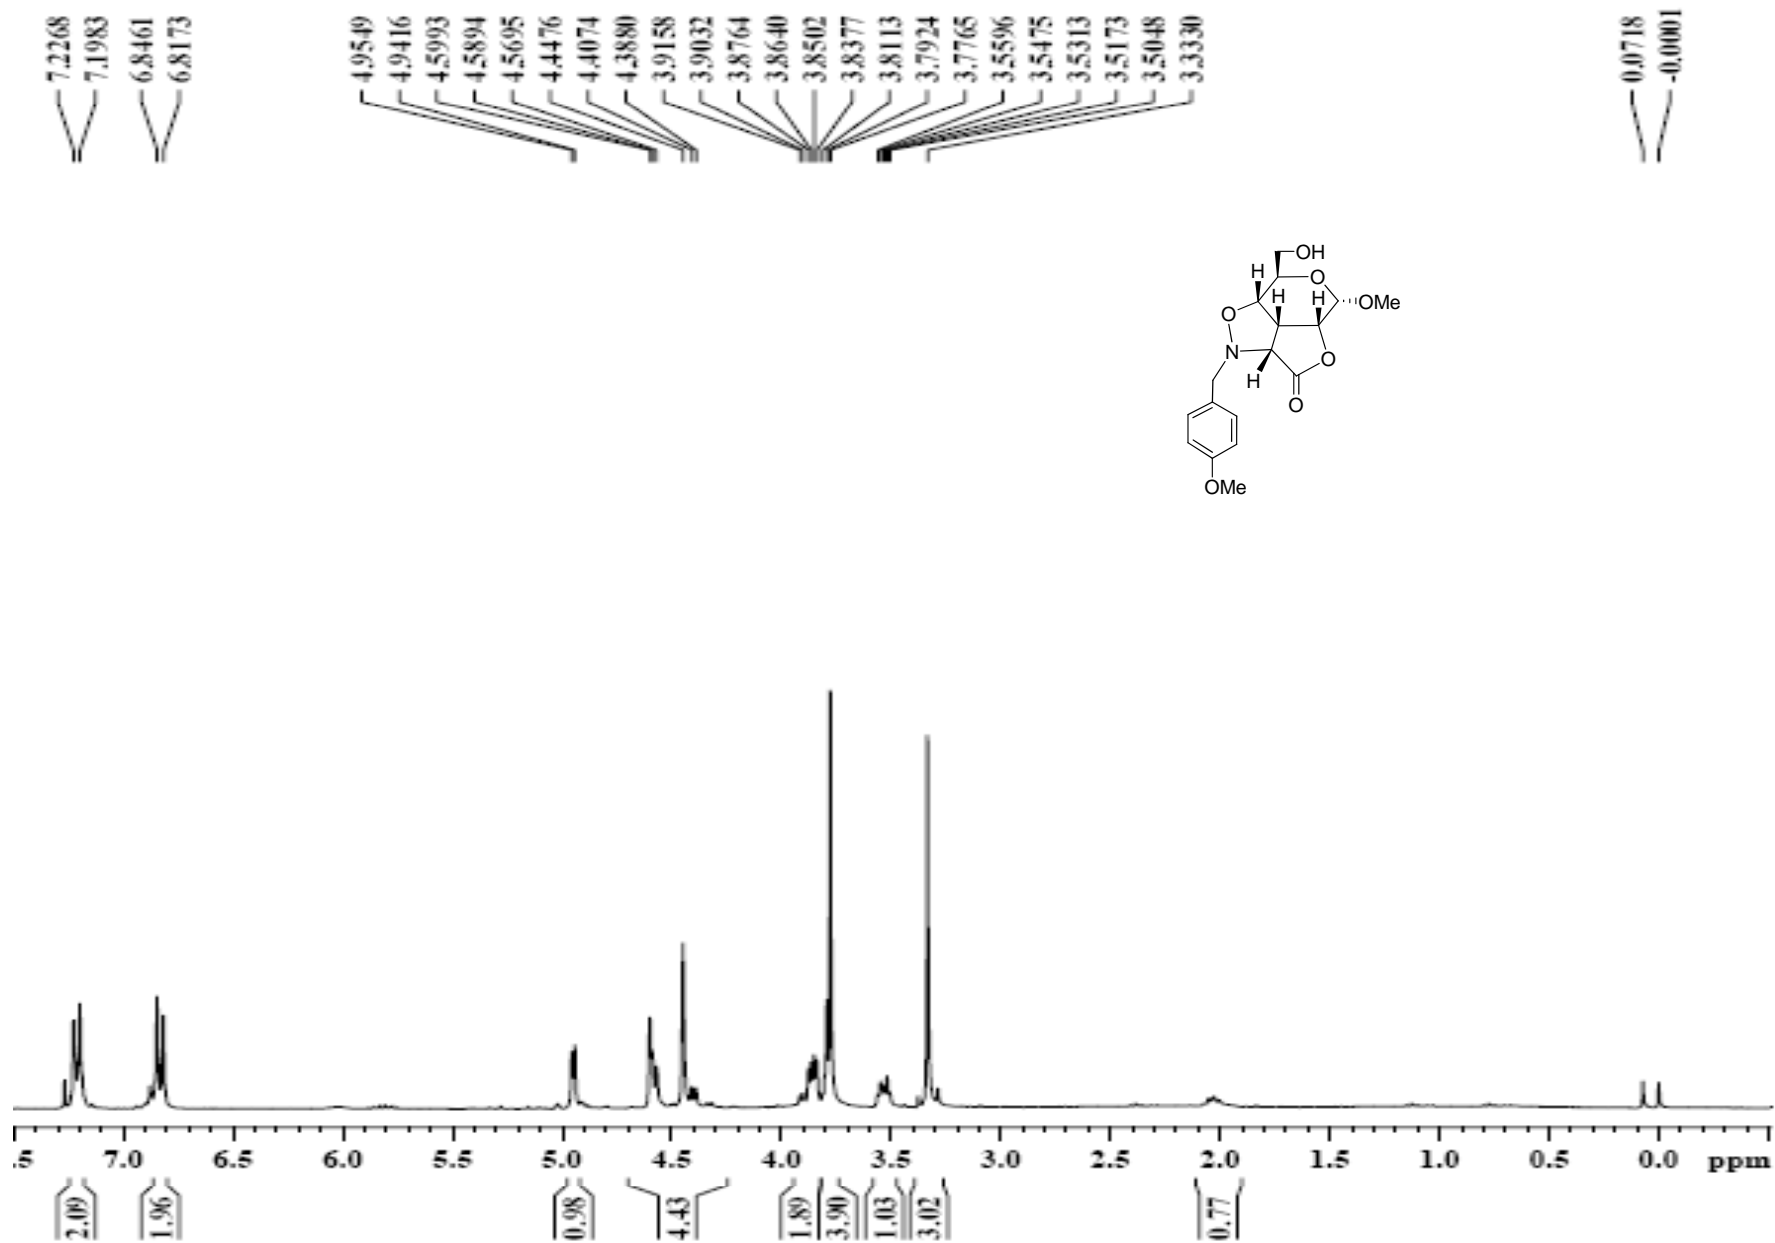

Figure 26 <sup>1</sup>H NMR spectrum of compound 20

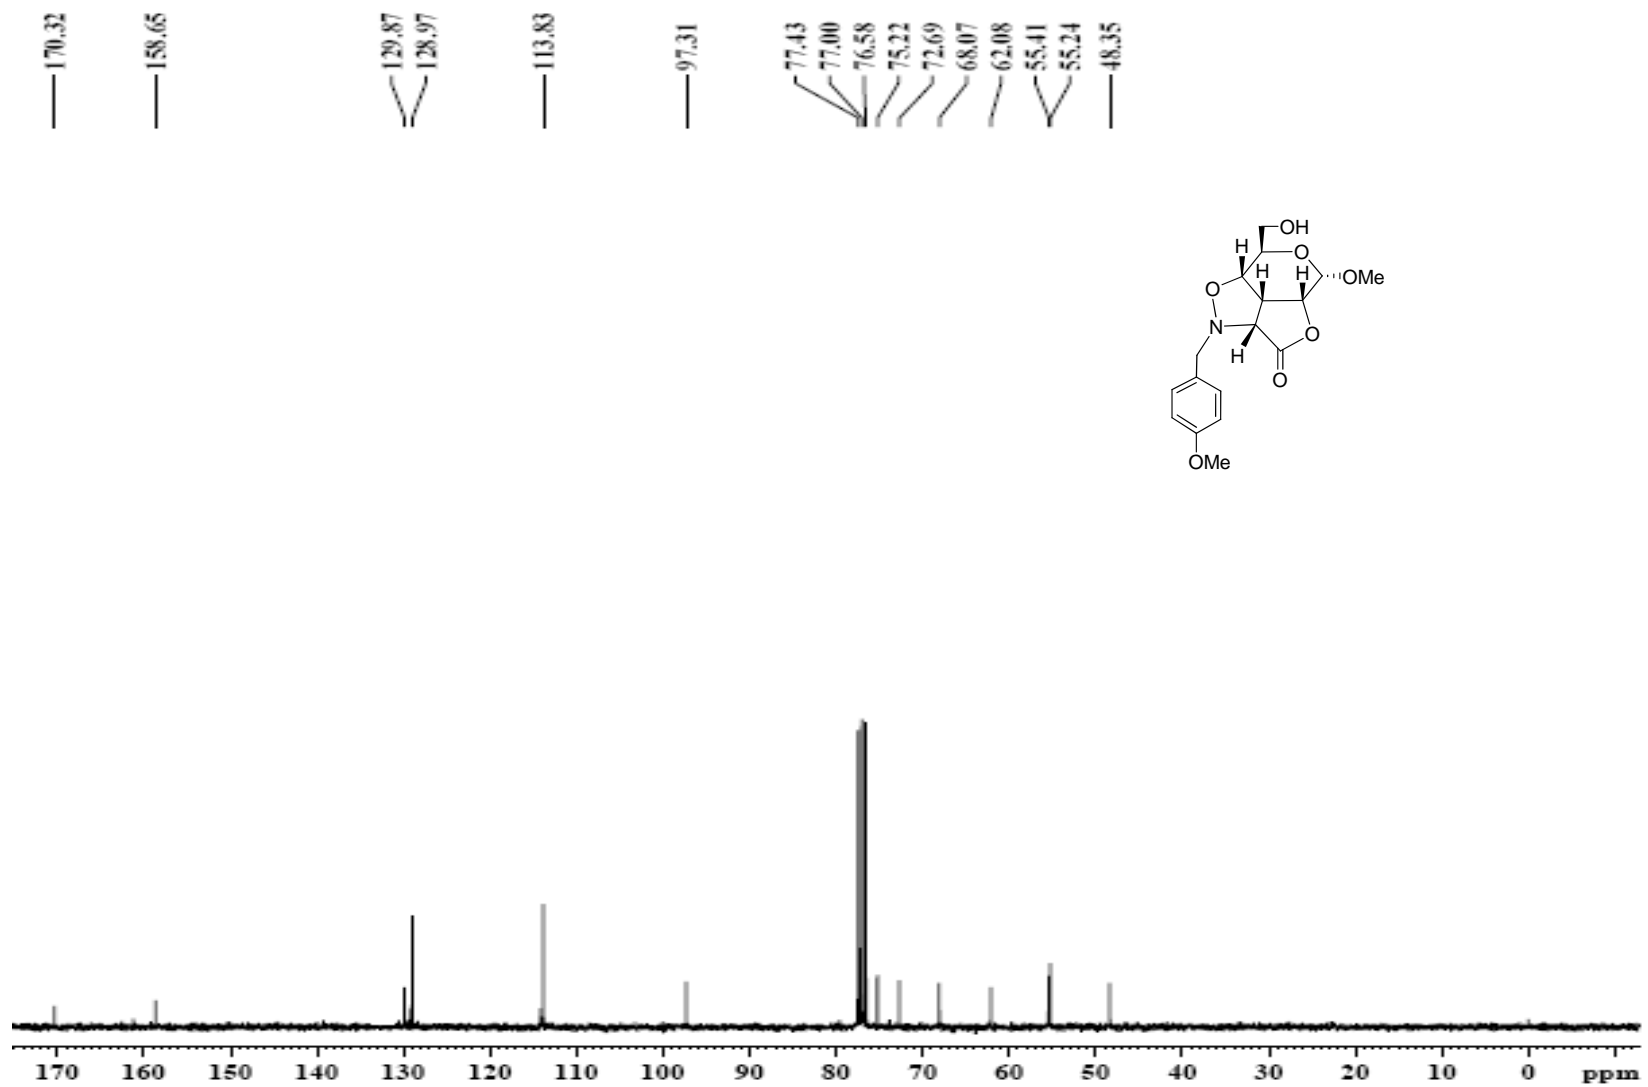

**Figure 27**  $^{13}\text{C}$  NMR spectrum of compound **20**

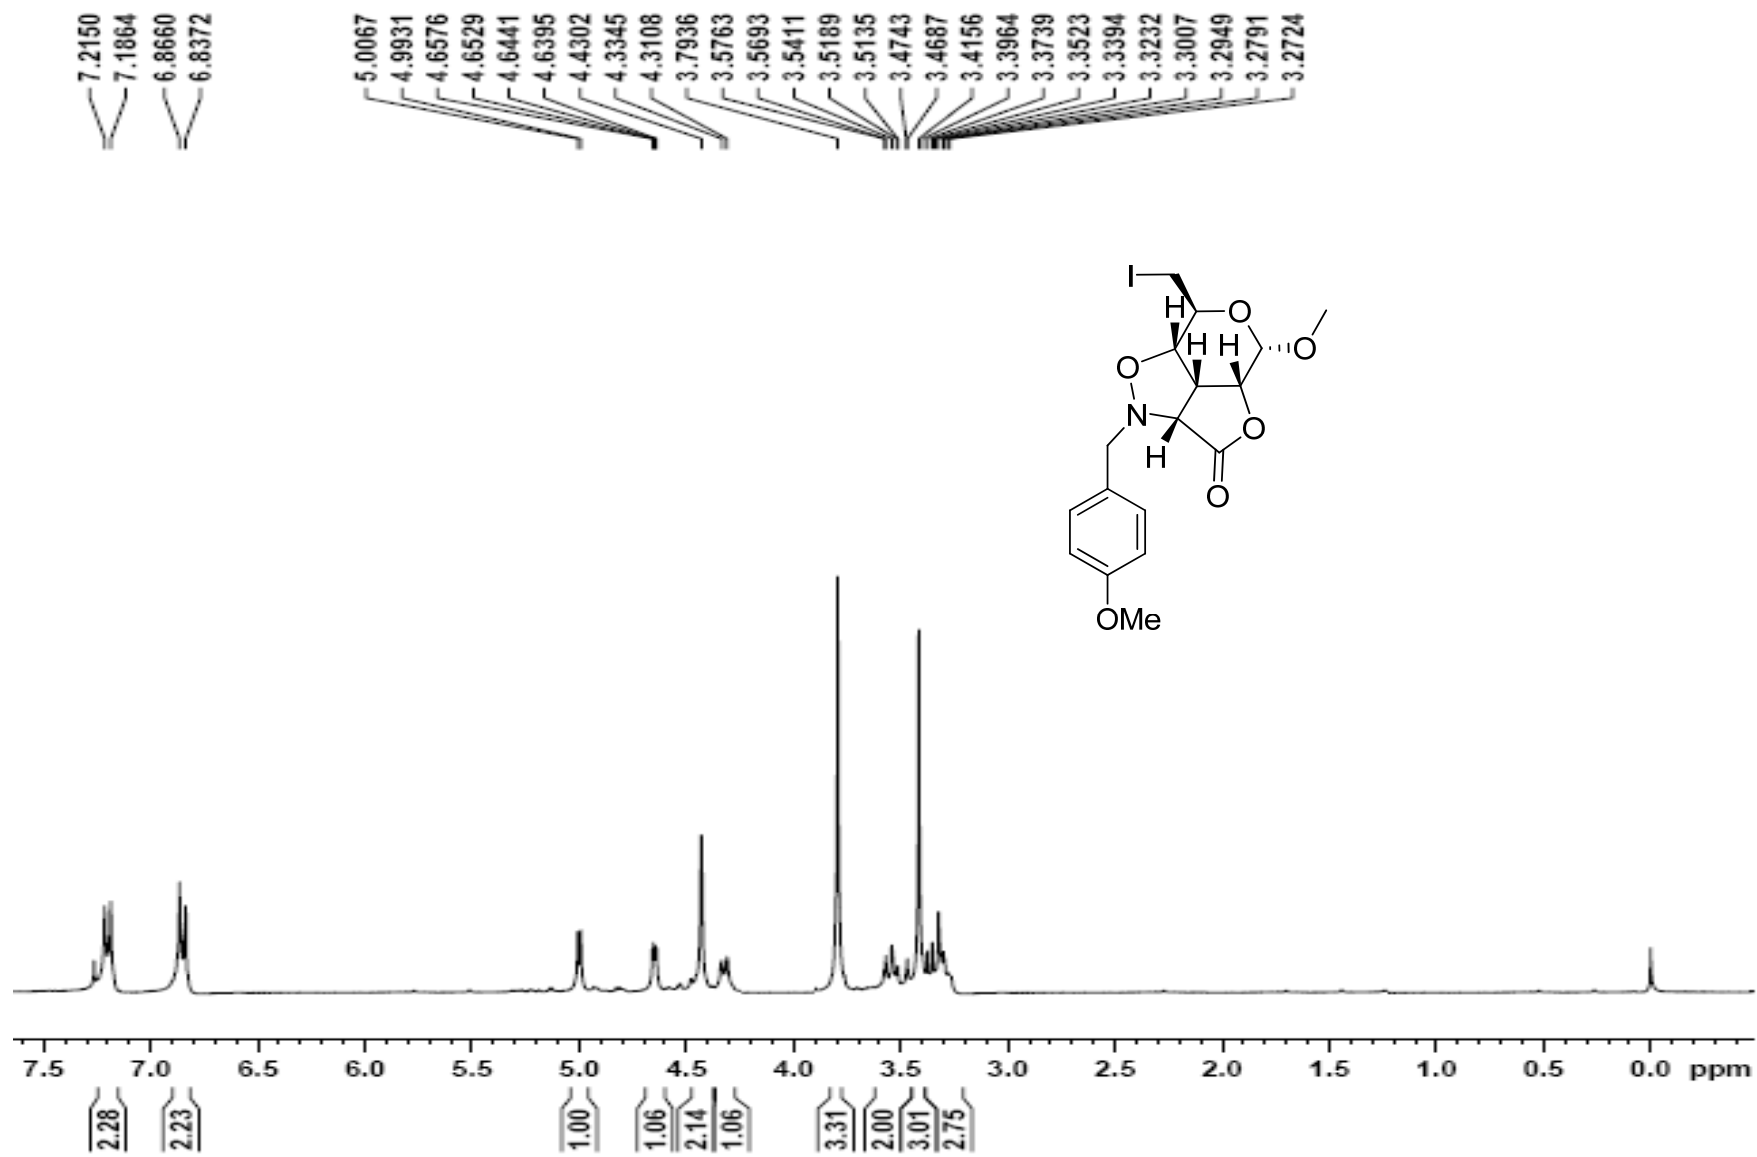

Figure 28  $^1\text{H}$  NMR spectrum of compound 21

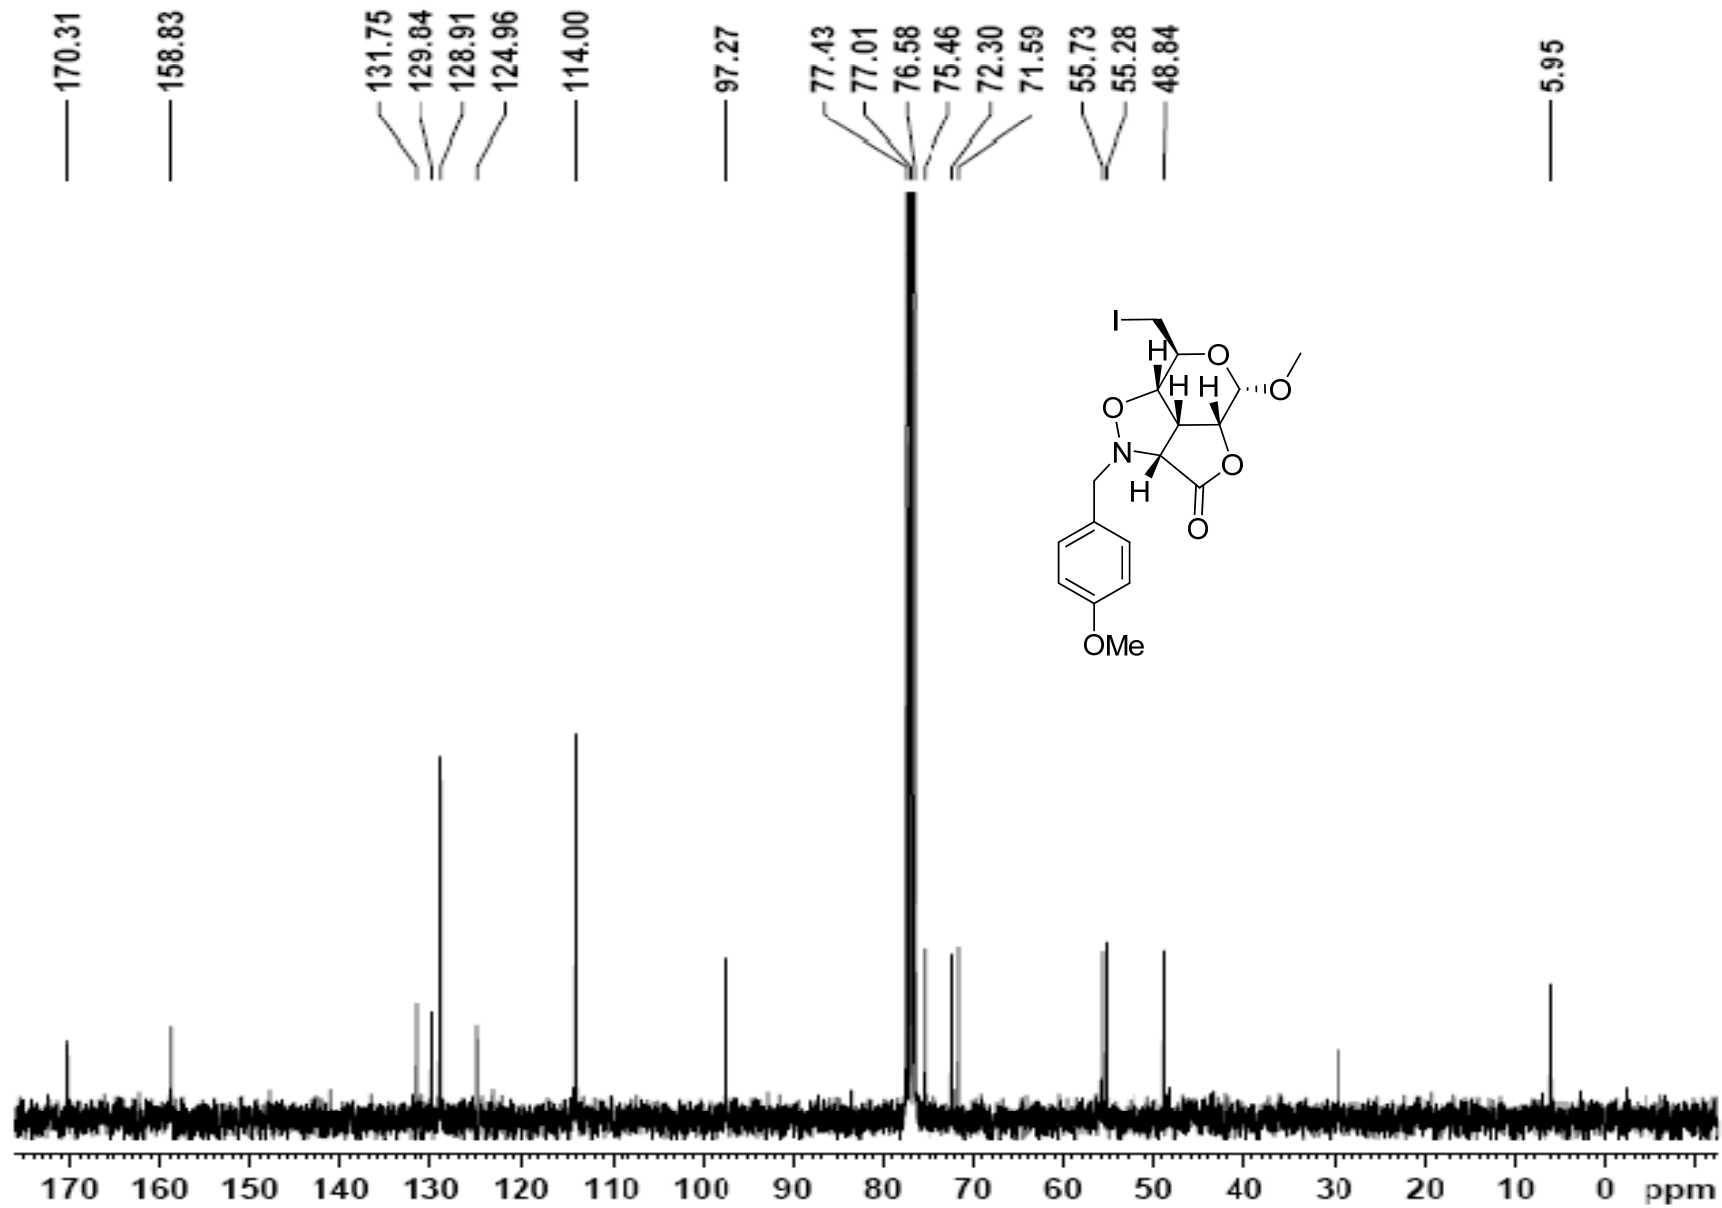

Figure 29  $^{13}\text{C}$  NMR spectrum of compound 21

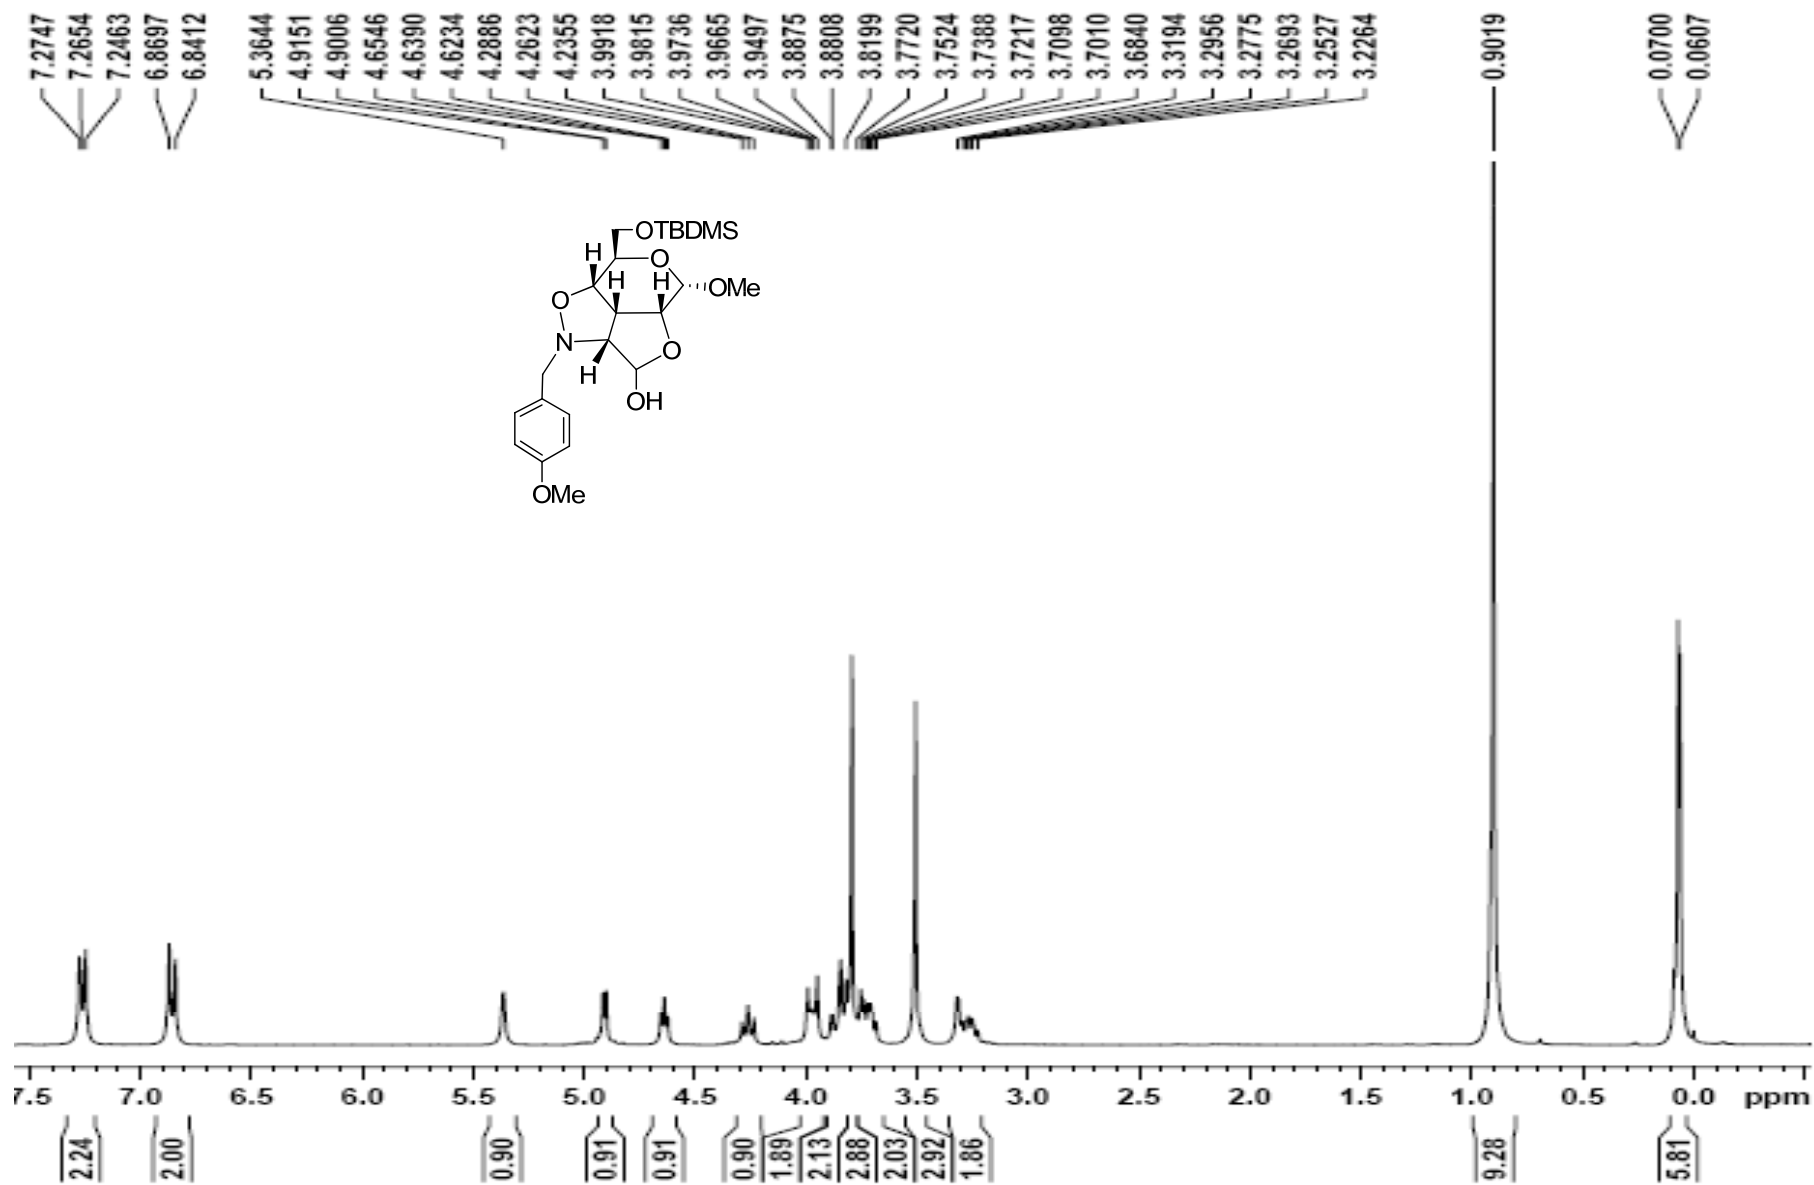

Figure 30  $^1\text{H}$  NMR spectrum of compound 22

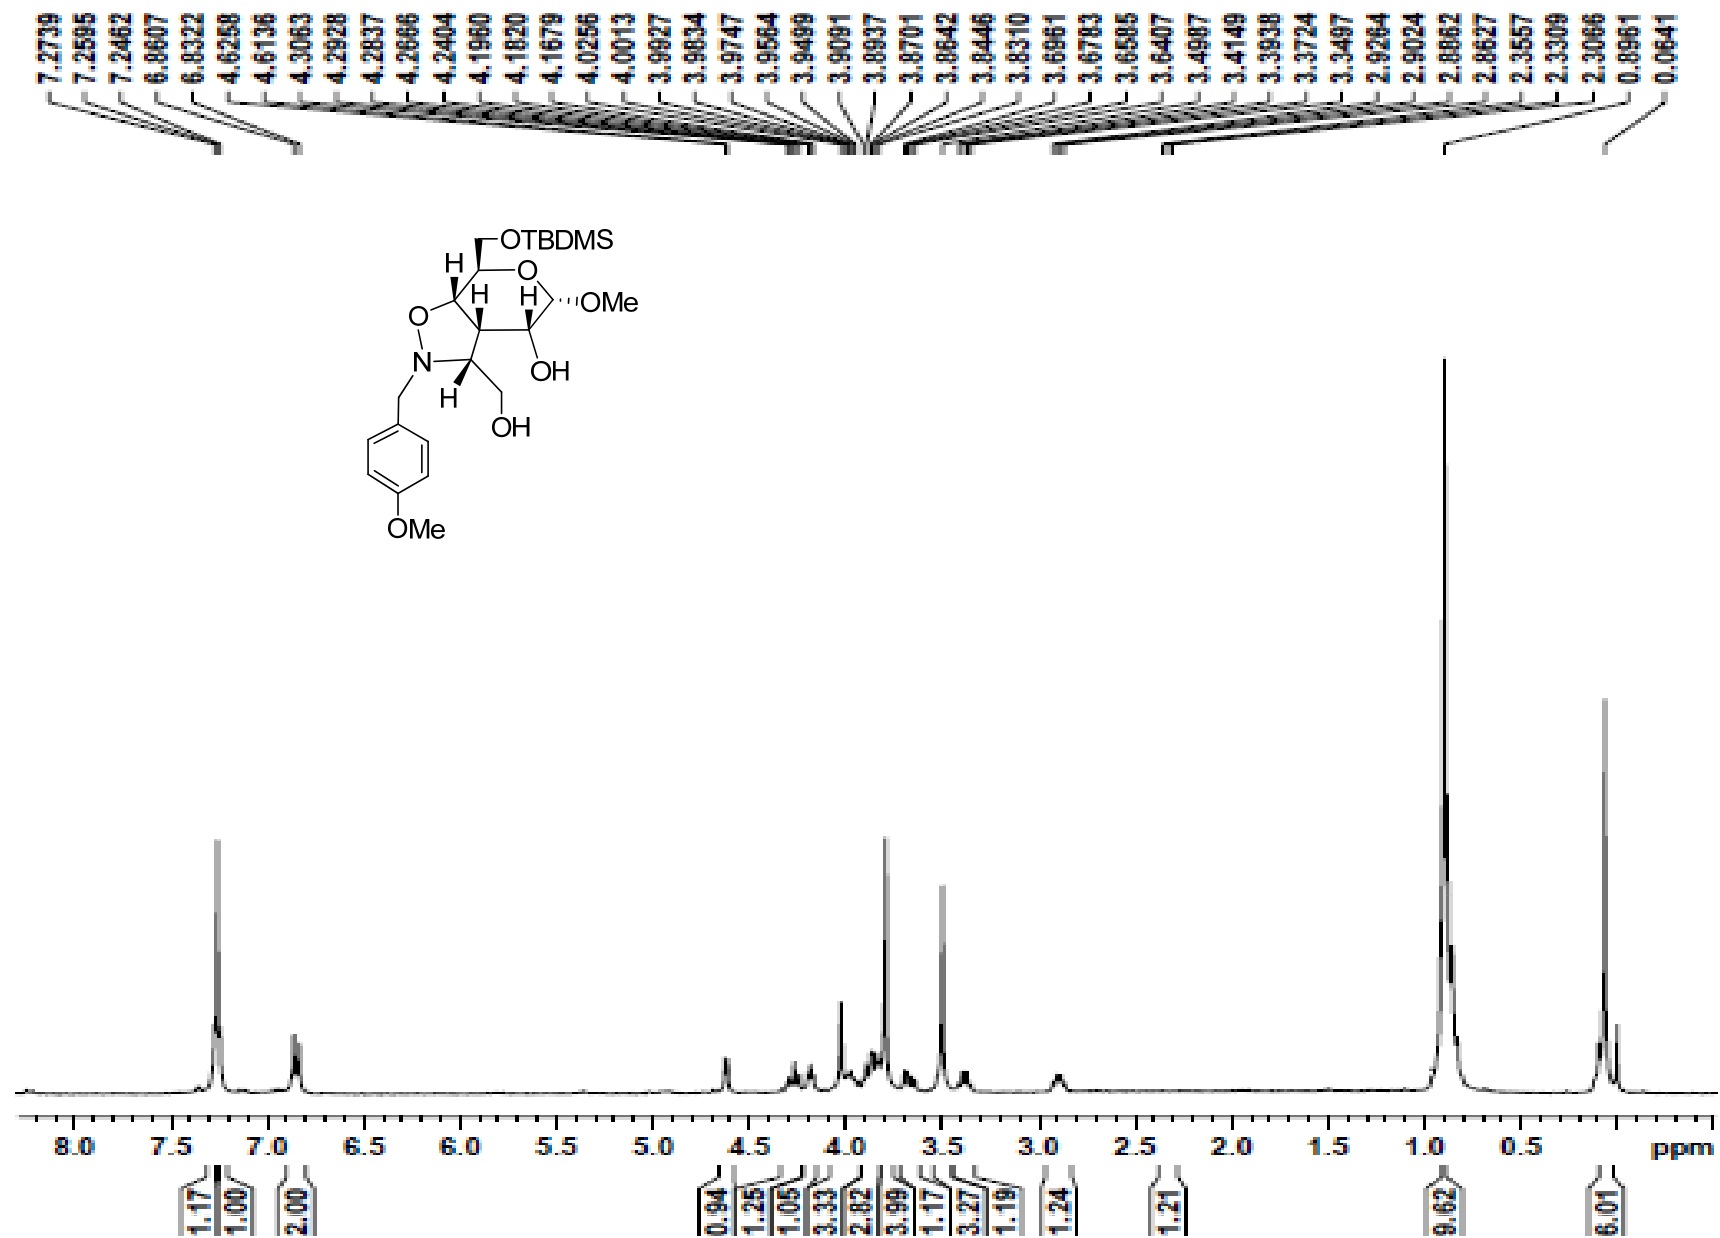

Figure 31 <sup>1</sup>H NMR spectrum of compound 23



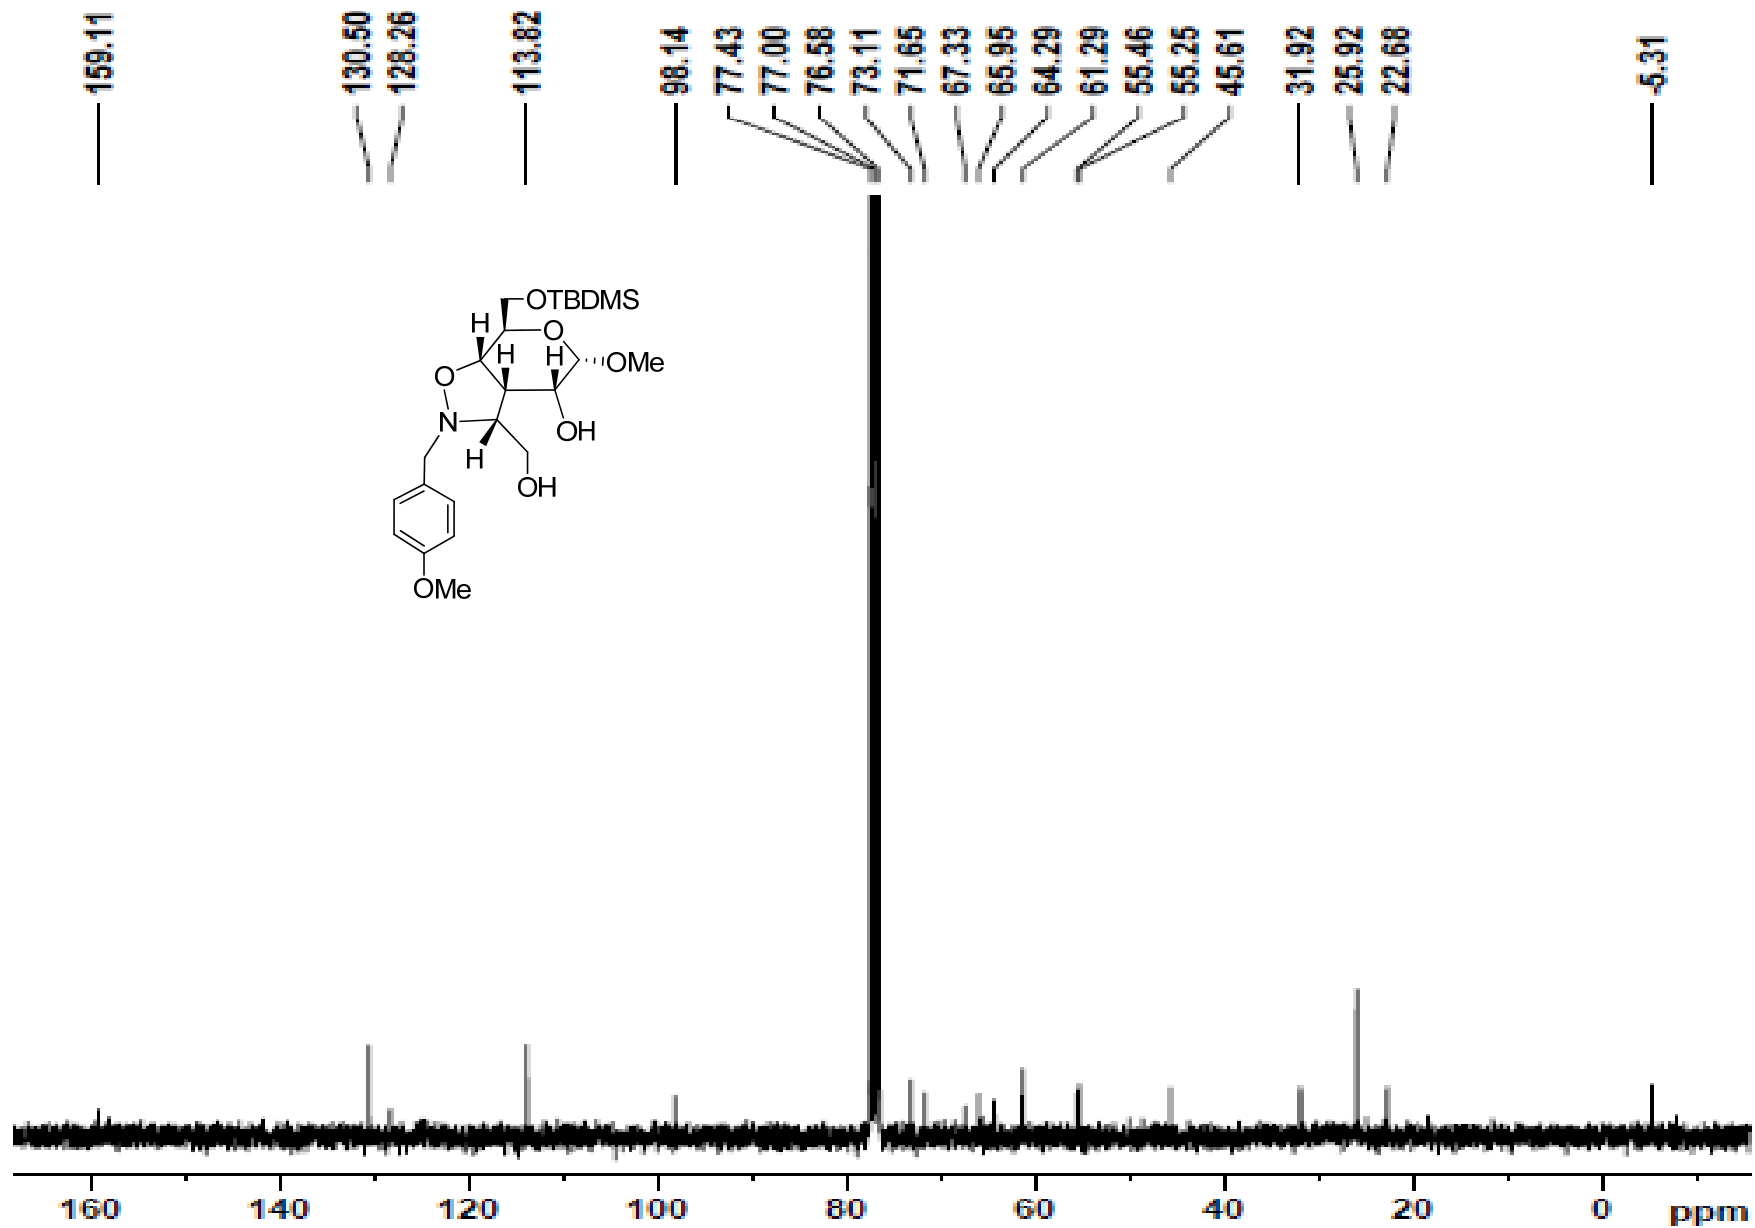

Figure 32 <sup>13</sup>C NMR spectrum of compound 23

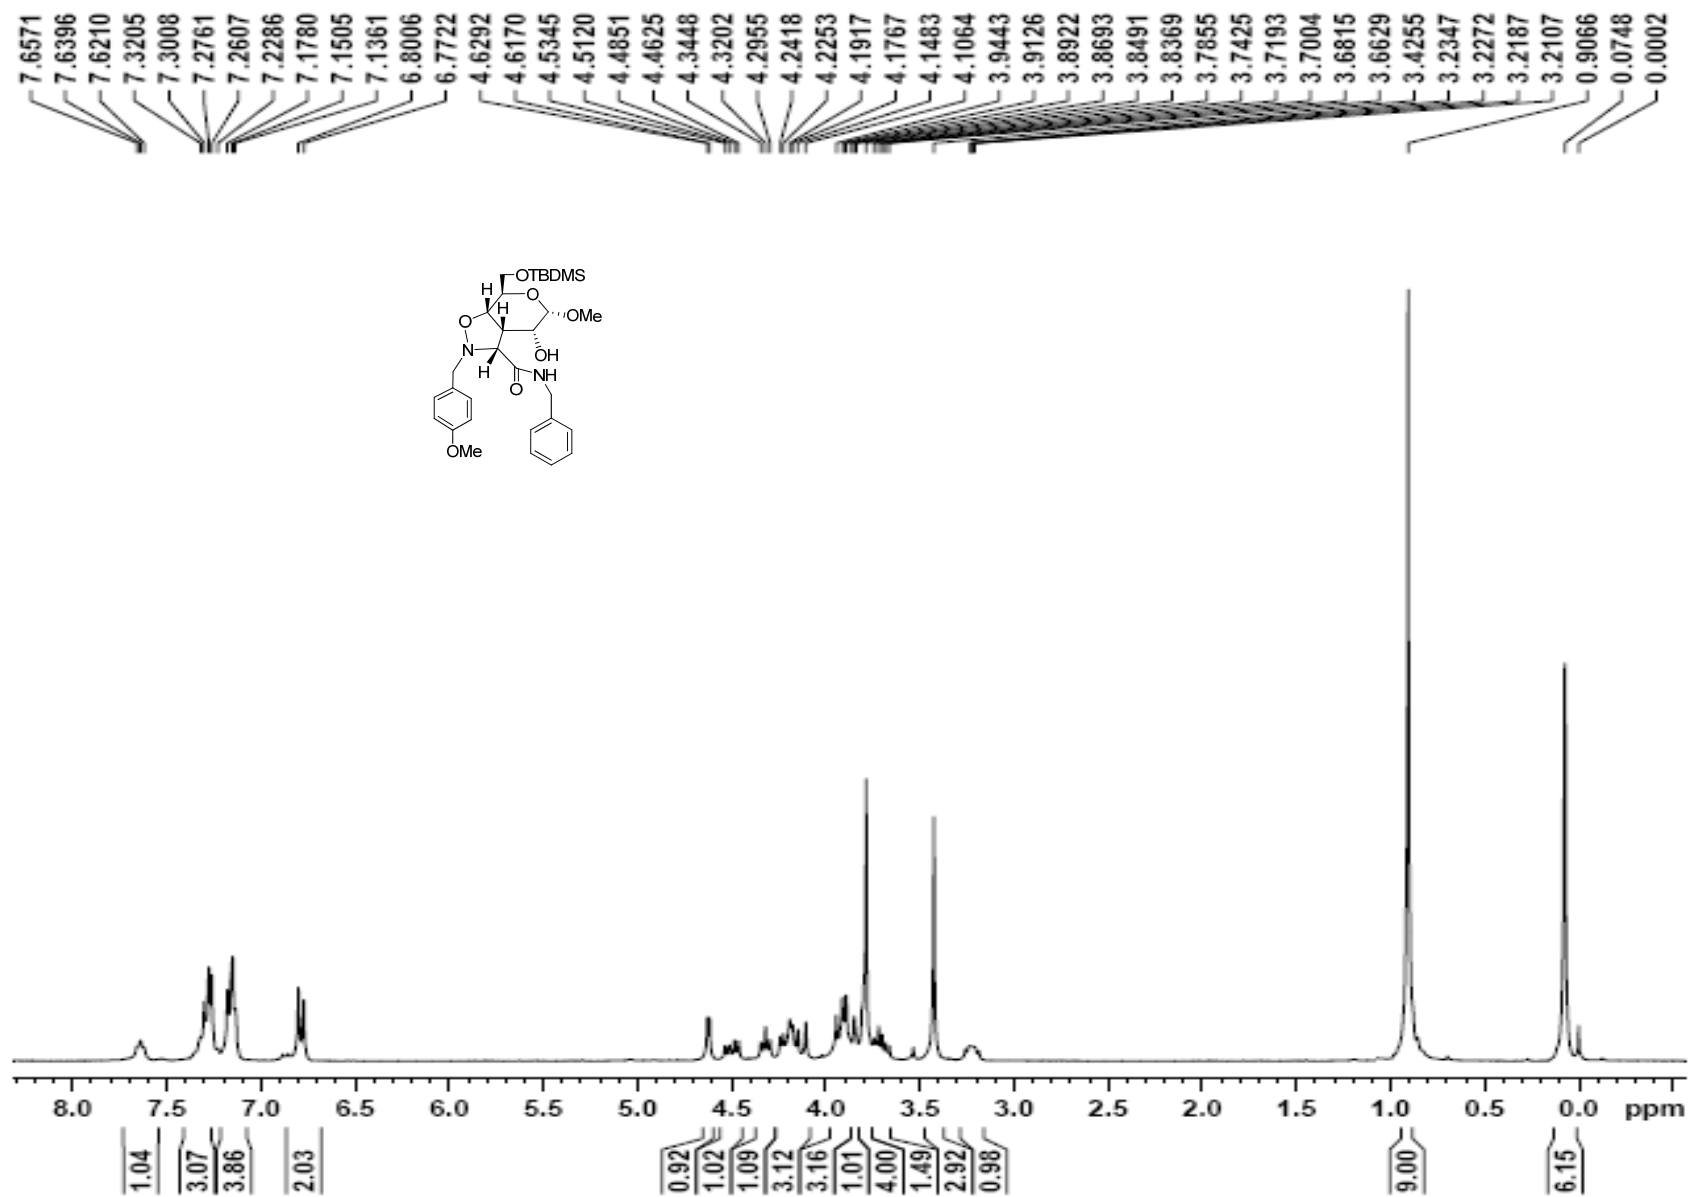

**Figure 33** <sup>1</sup>H NMR spectrum of compound 24

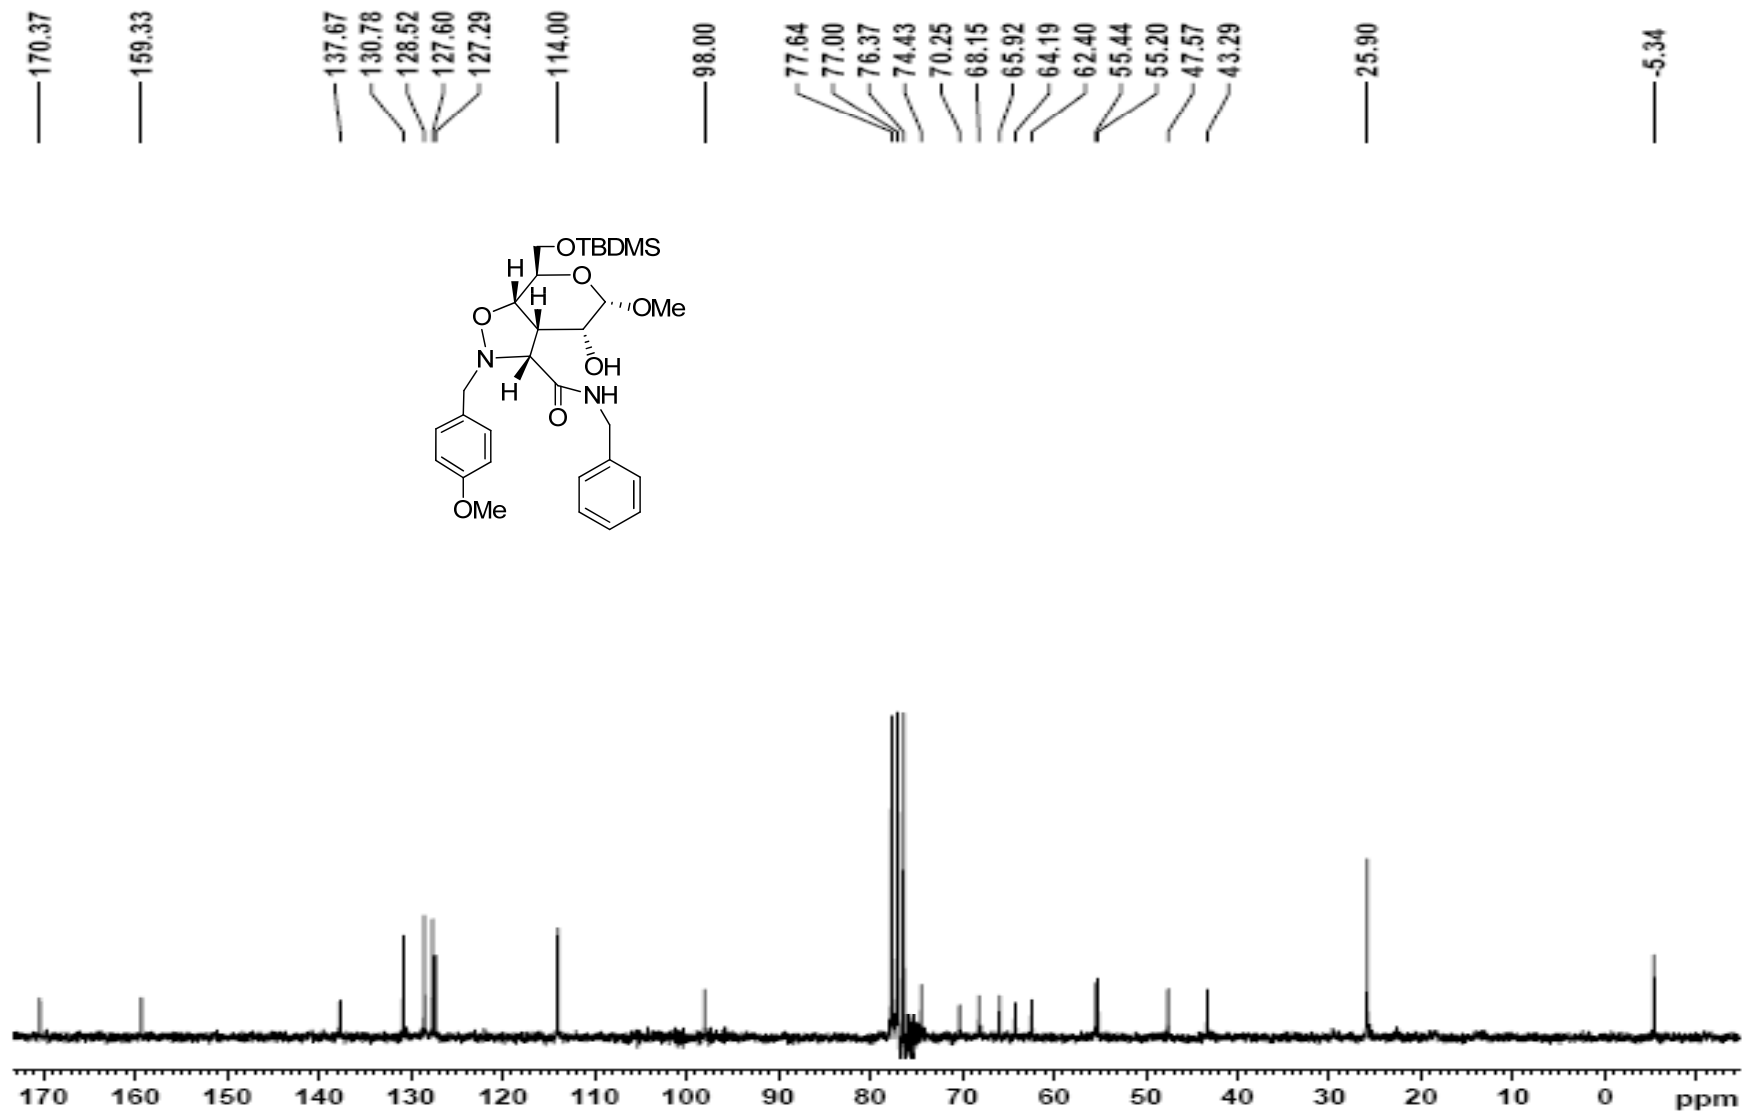

Figure 34 <sup>13</sup>C NMR spectrum of compound 24

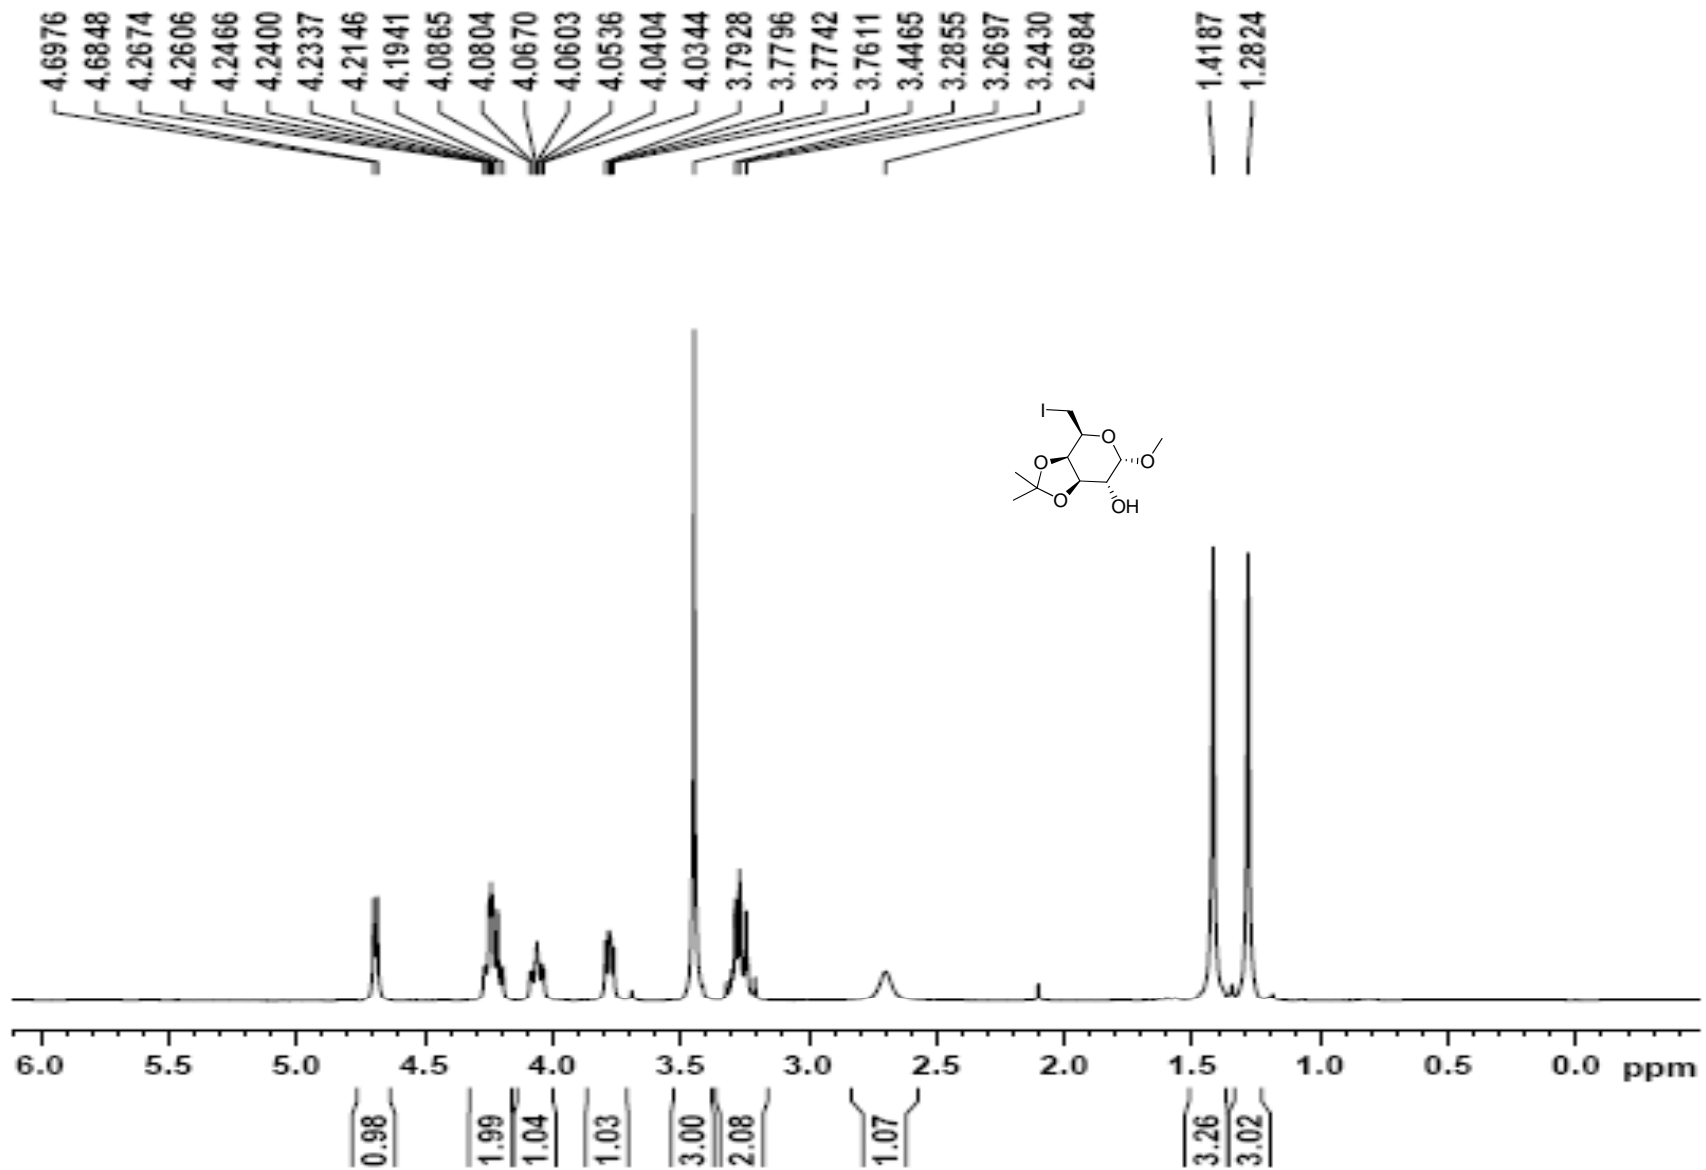

Figure 35  $^1\text{H}$  NMR spectrum of compound 25

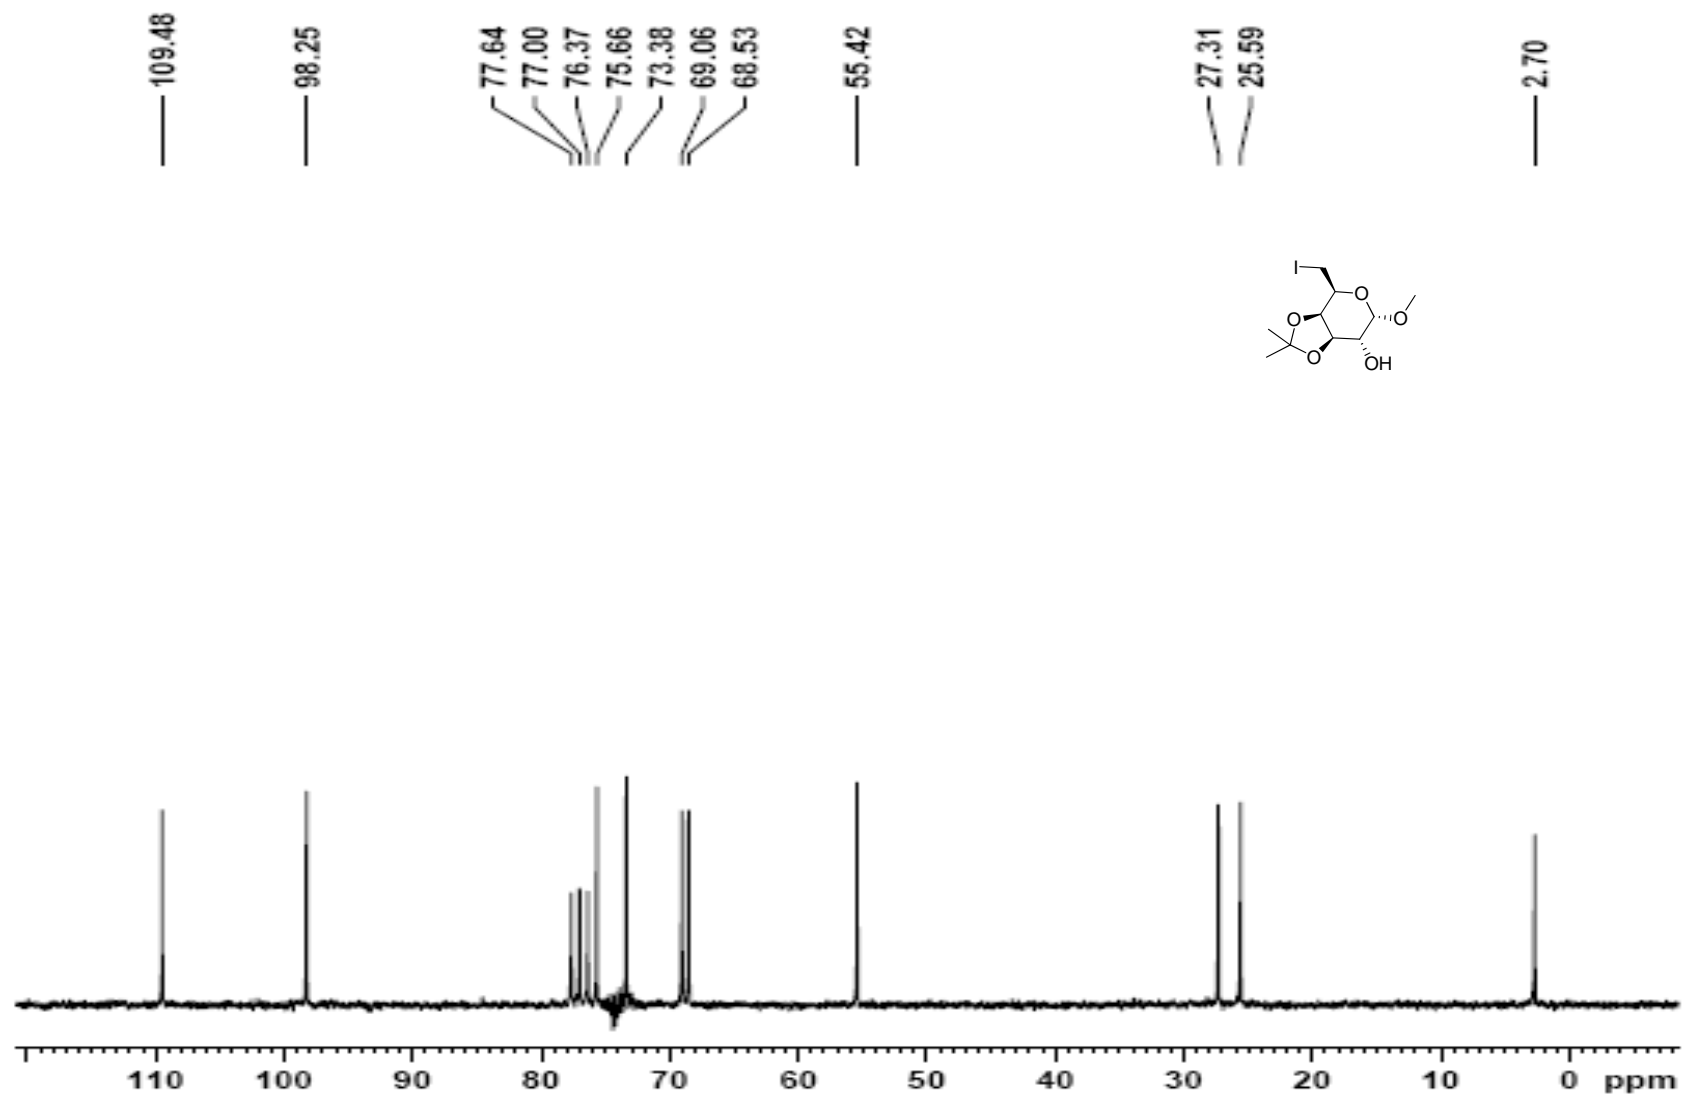

Figure 36 <sup>13</sup>C NMR spectrum of compound 25

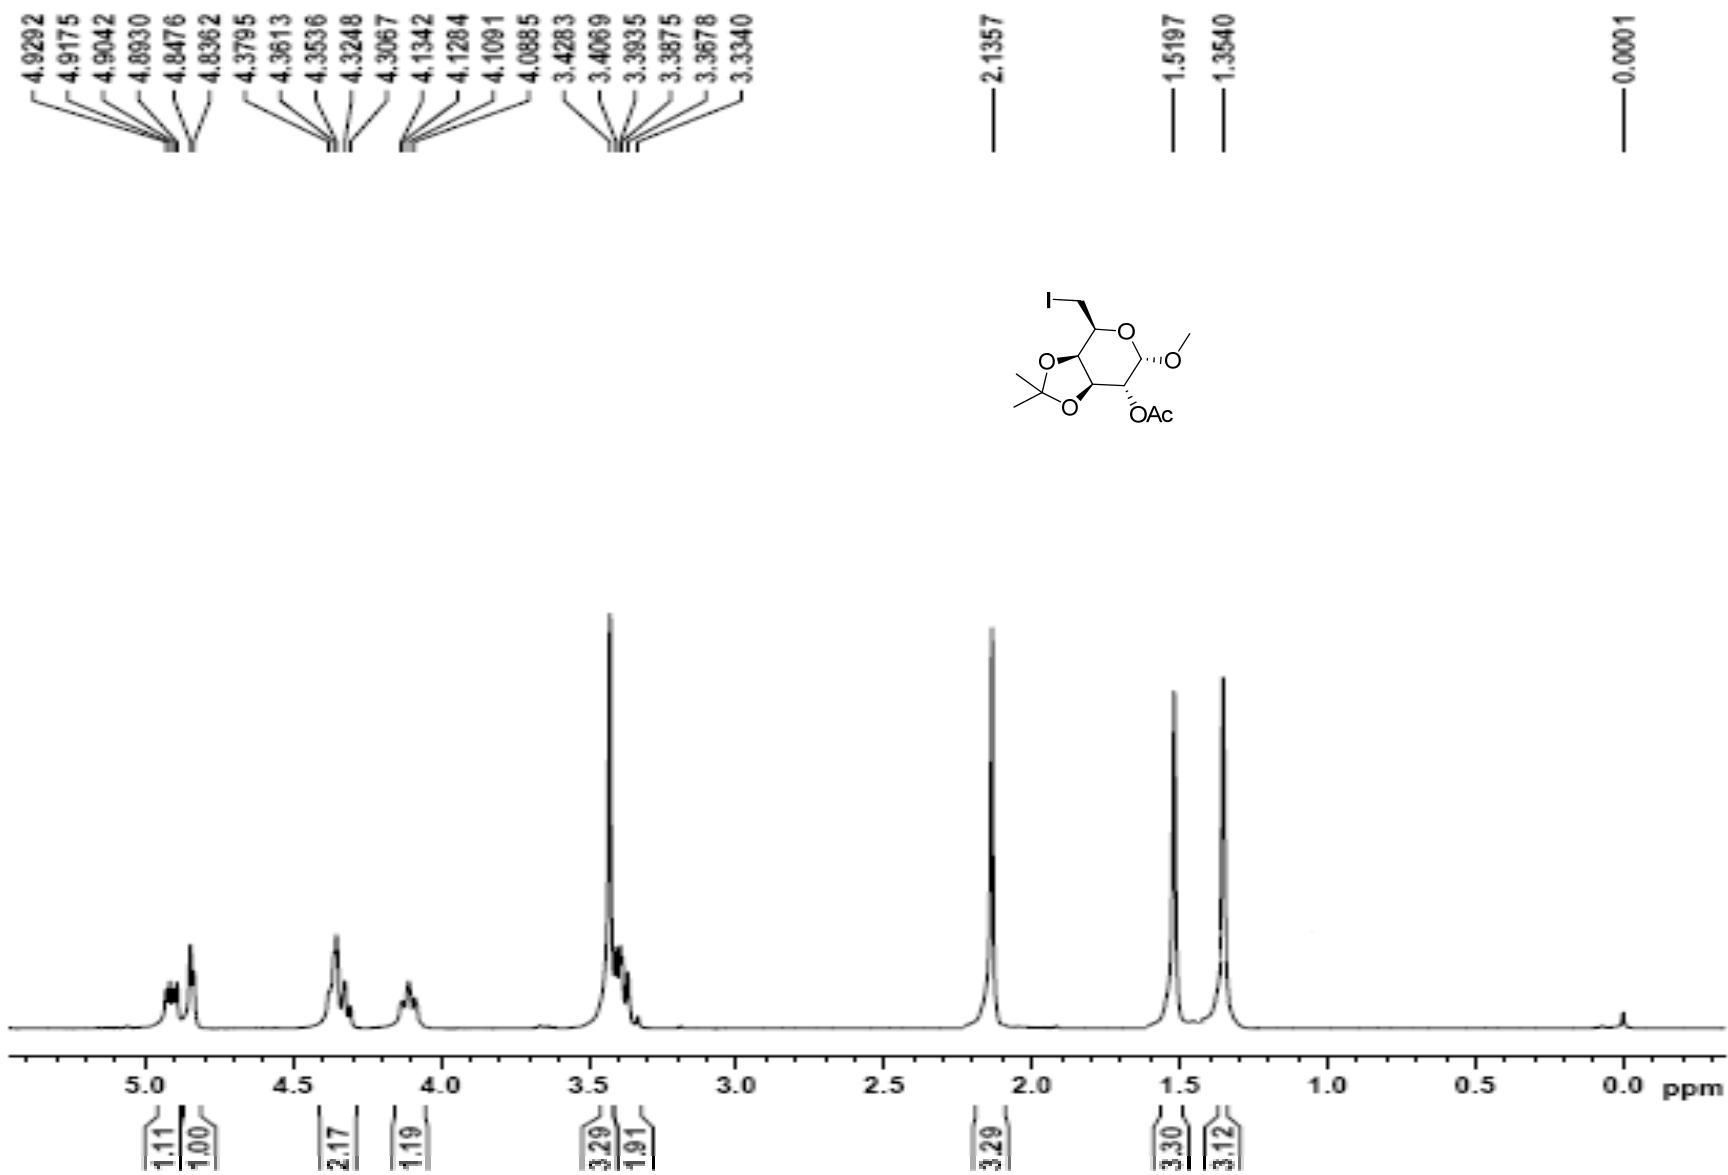

Figure 37  $^1\text{H}$  NMR spectrum of compound 26

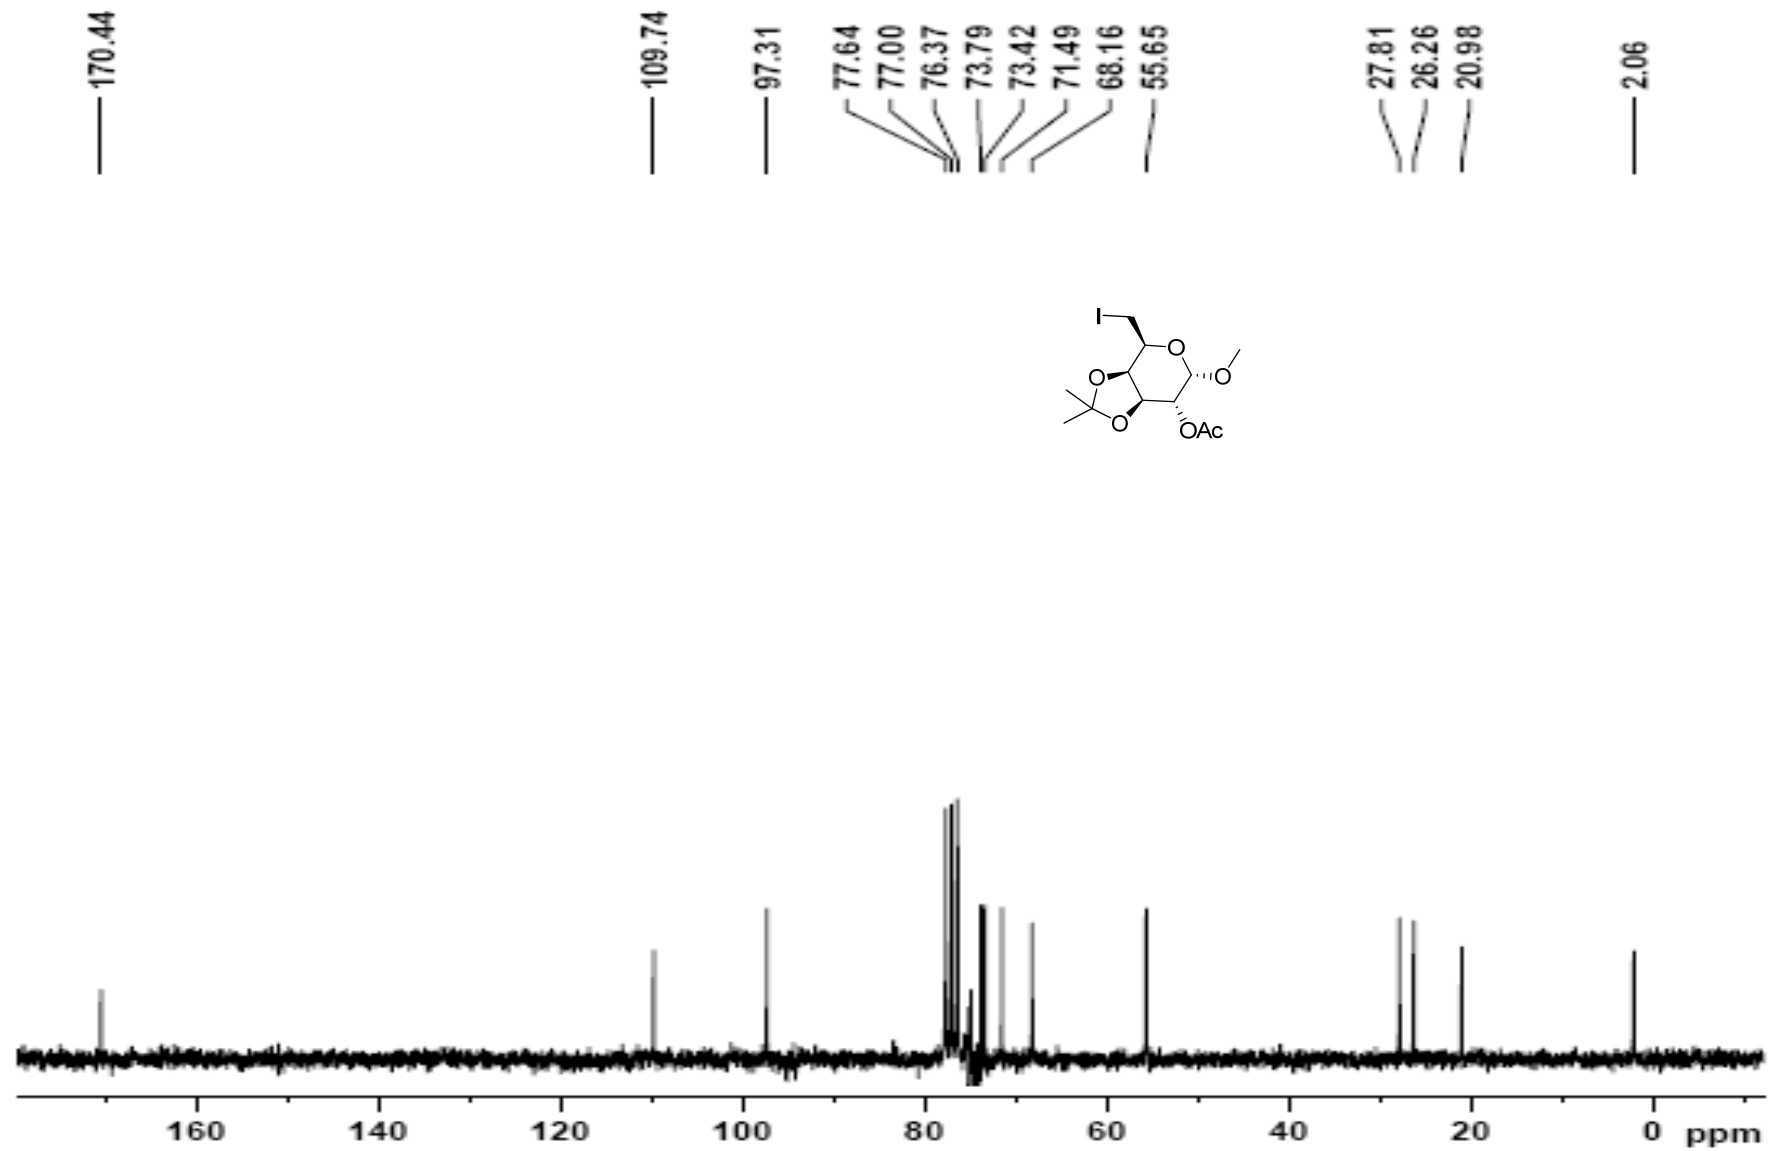

Figure 38 <sup>13</sup>C NMR spectrum of compound 26

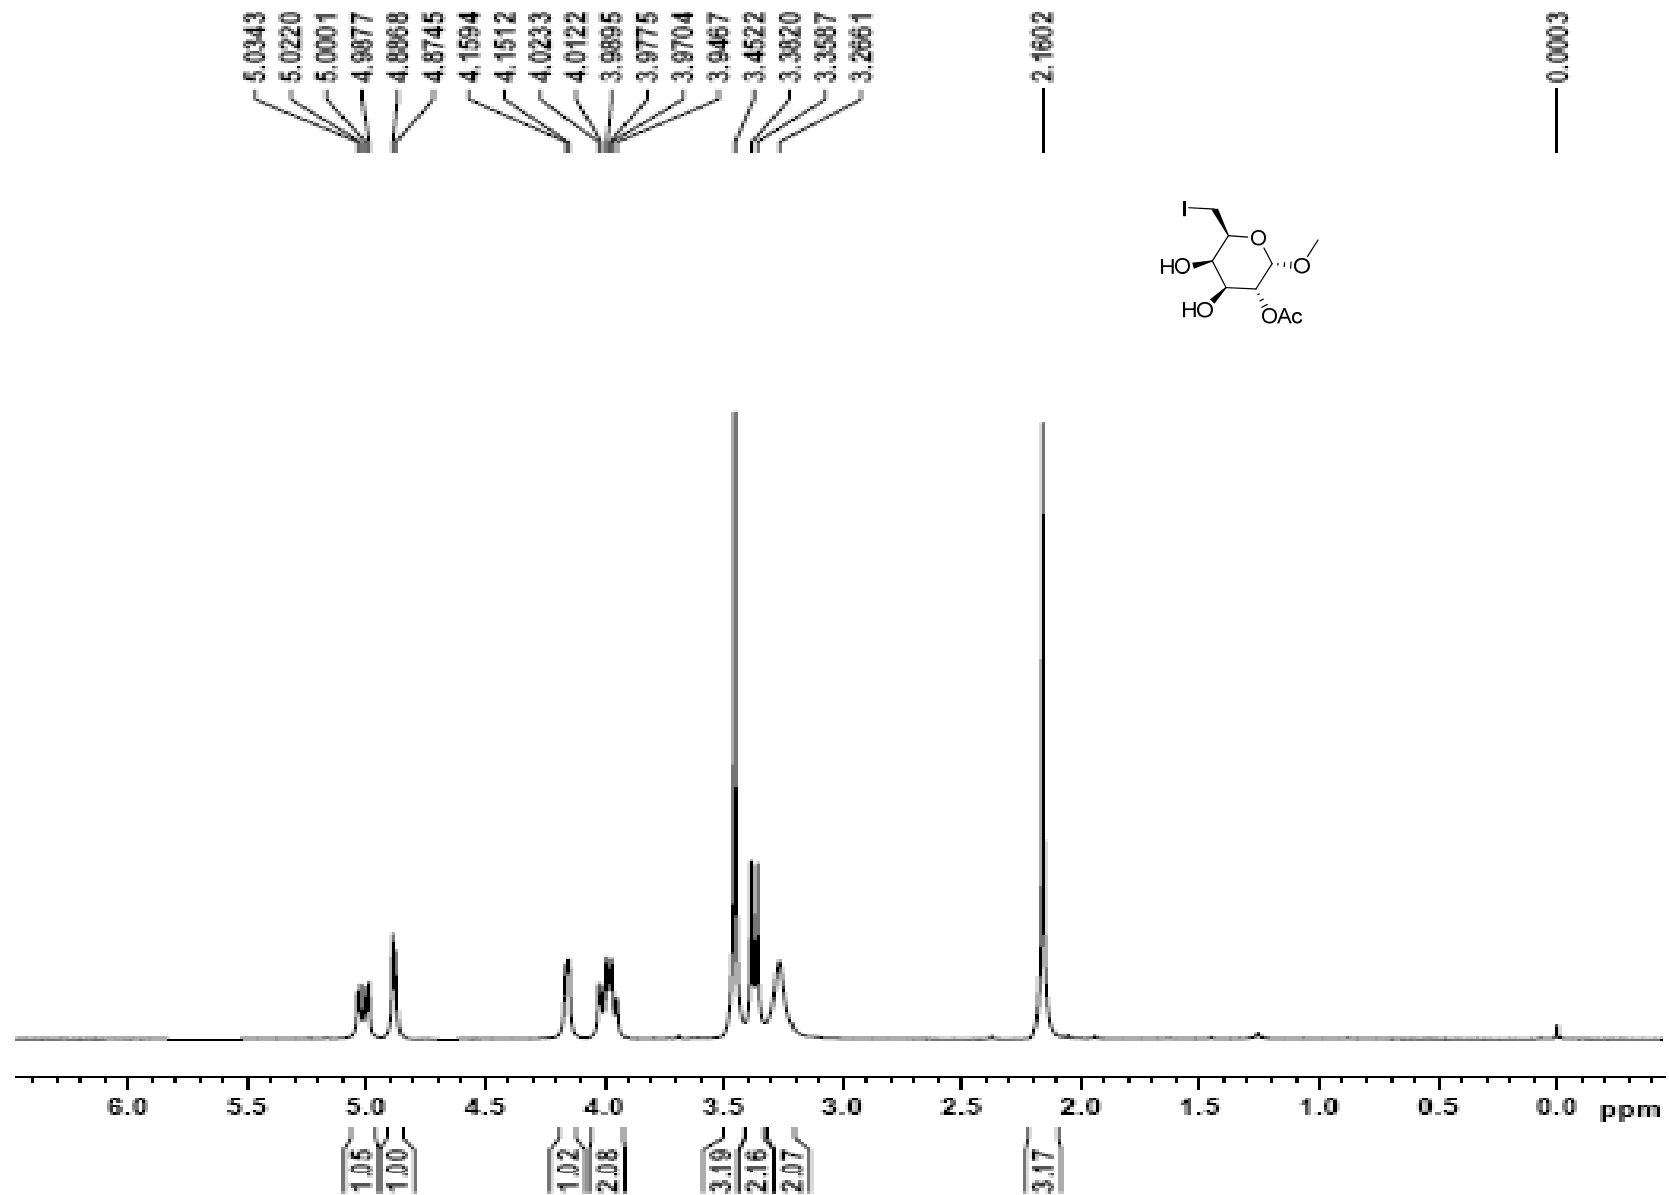

Figure 39 <sup>1</sup>H NMR spectrum of compound 27



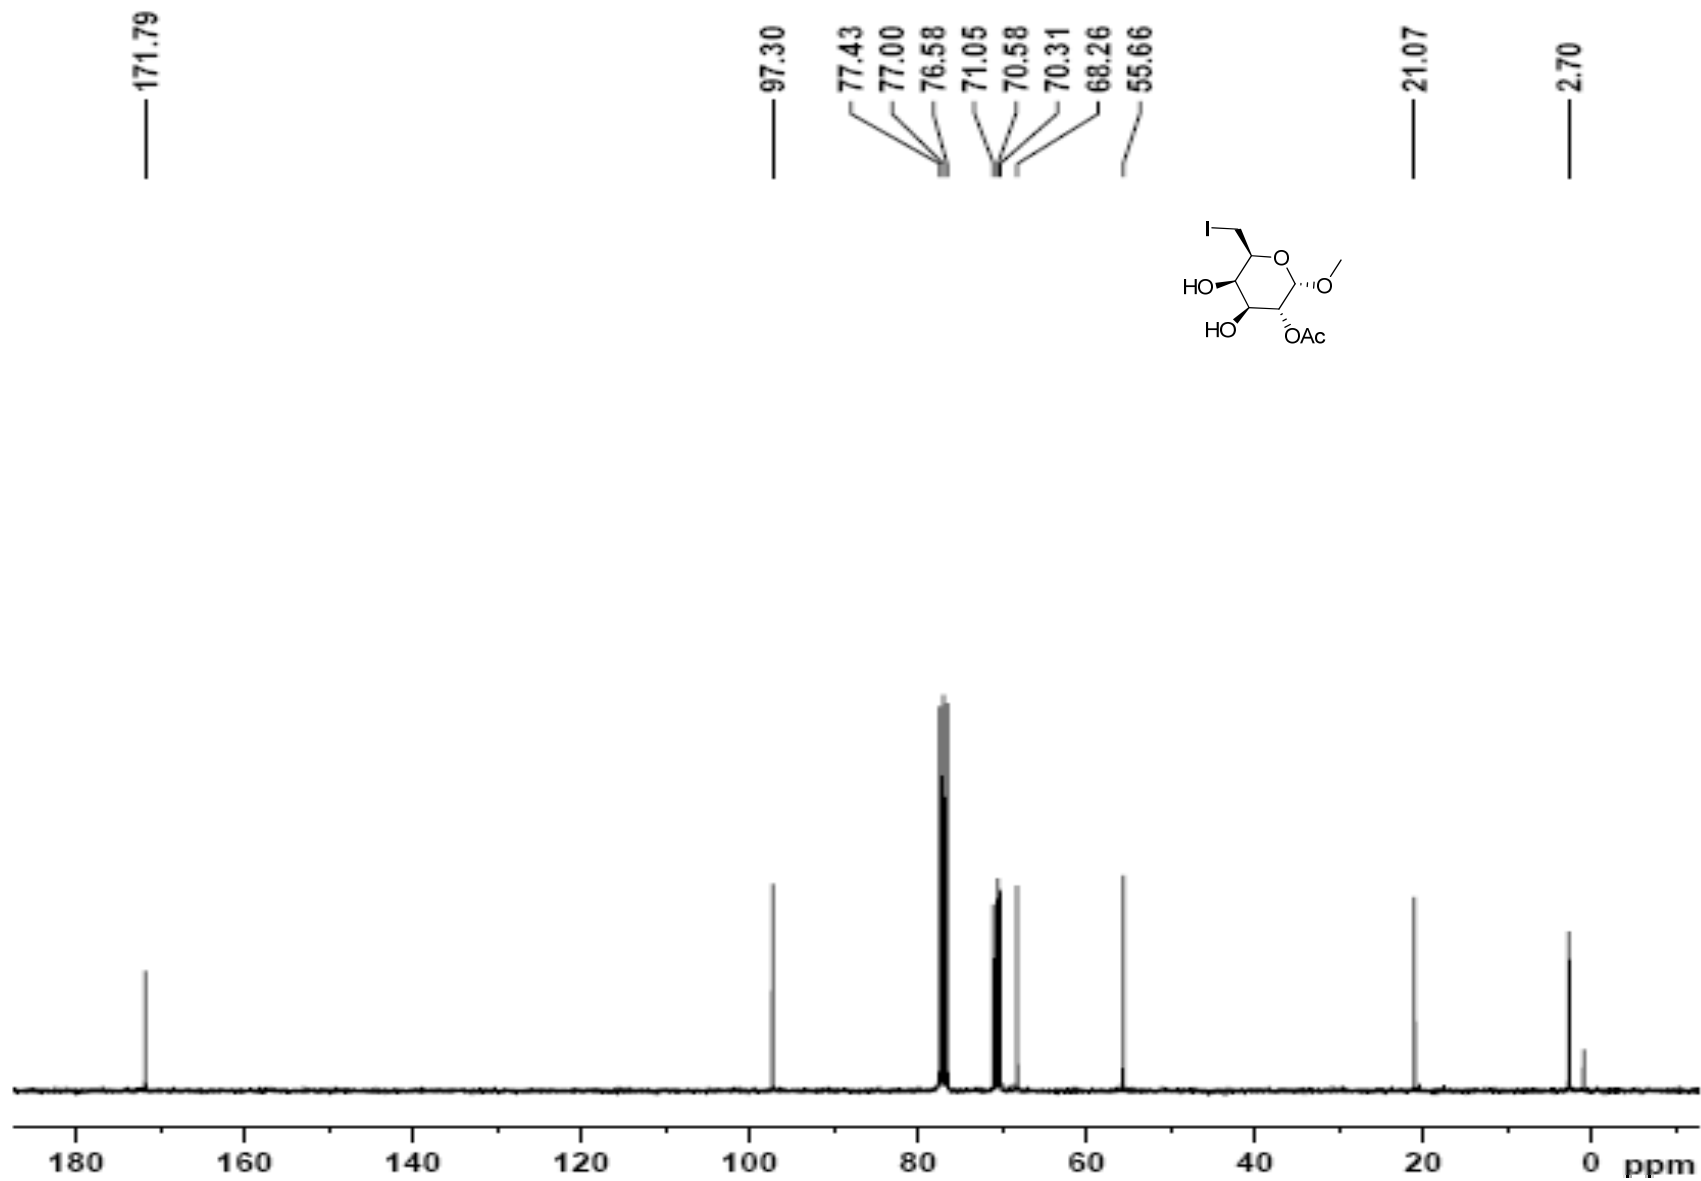

Figure 40 <sup>13</sup>C NMR spectrum of compound 27

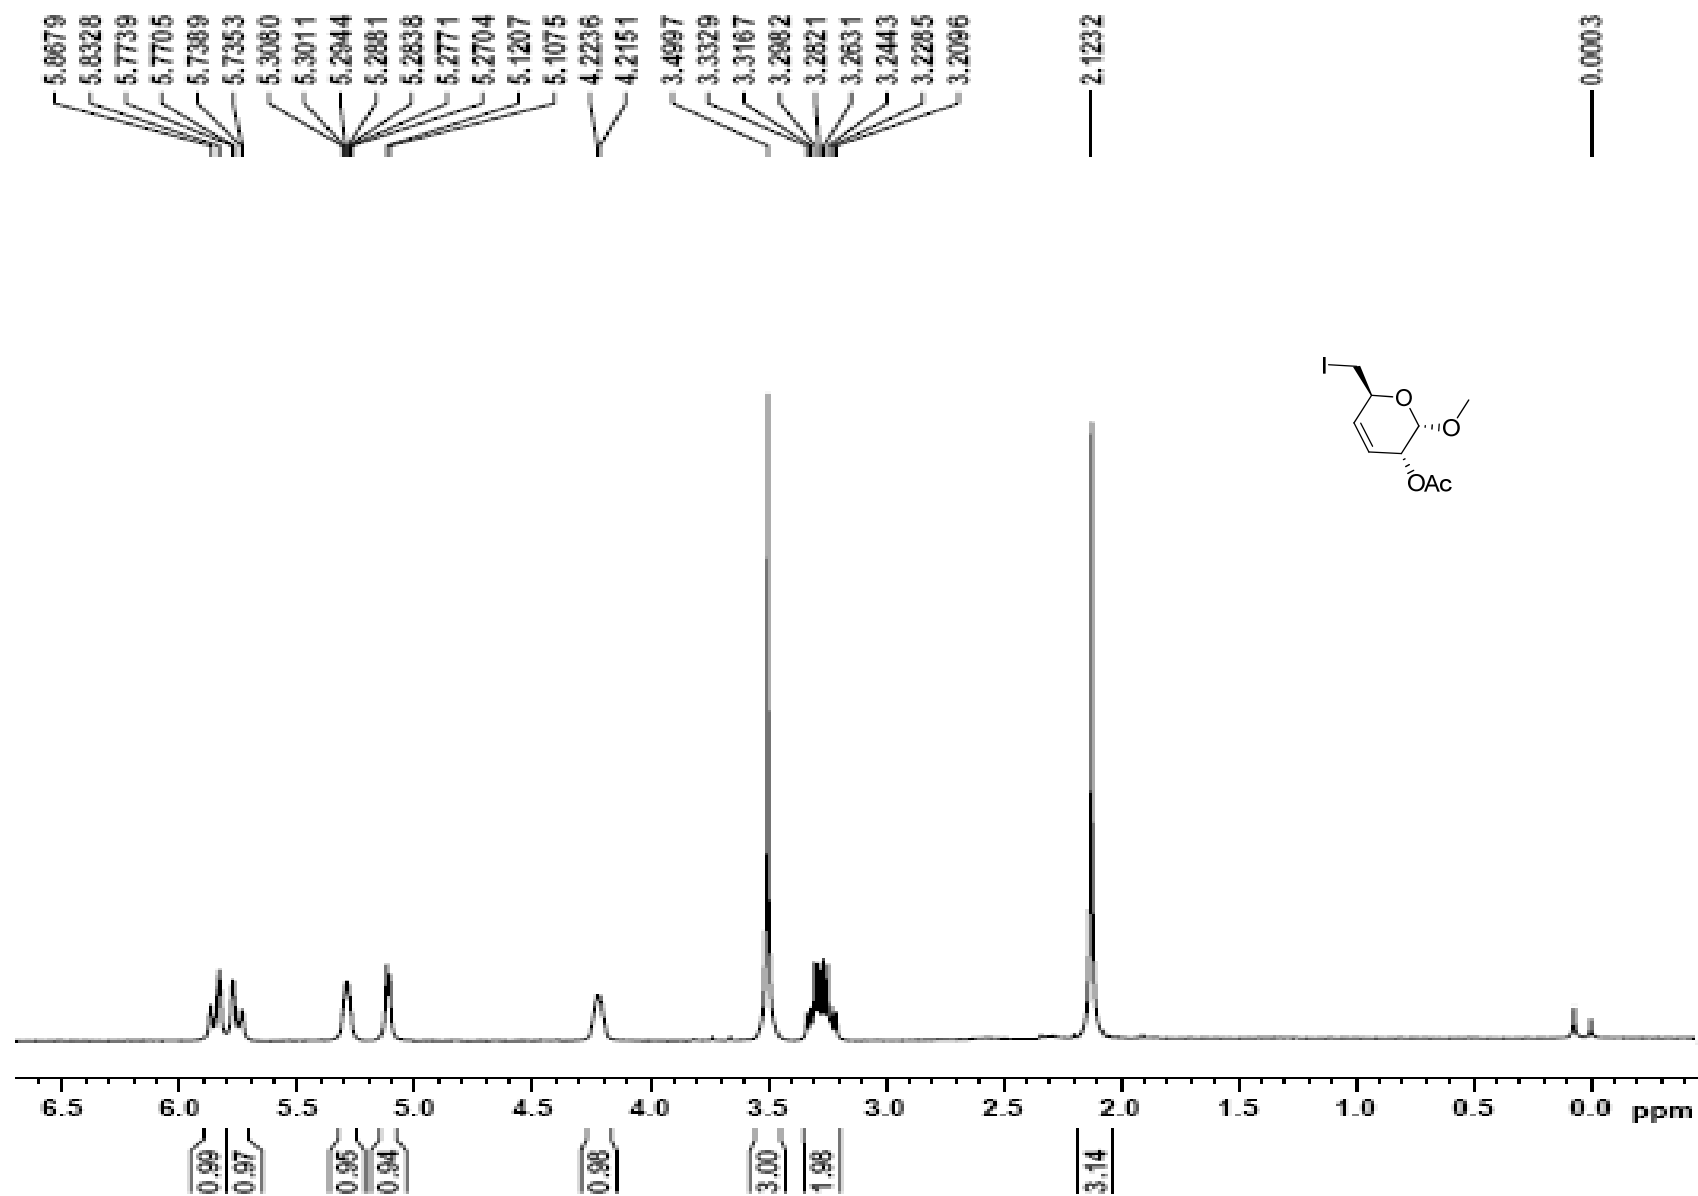

Figure 41 <sup>1</sup>H NMR spectrum of compound 28

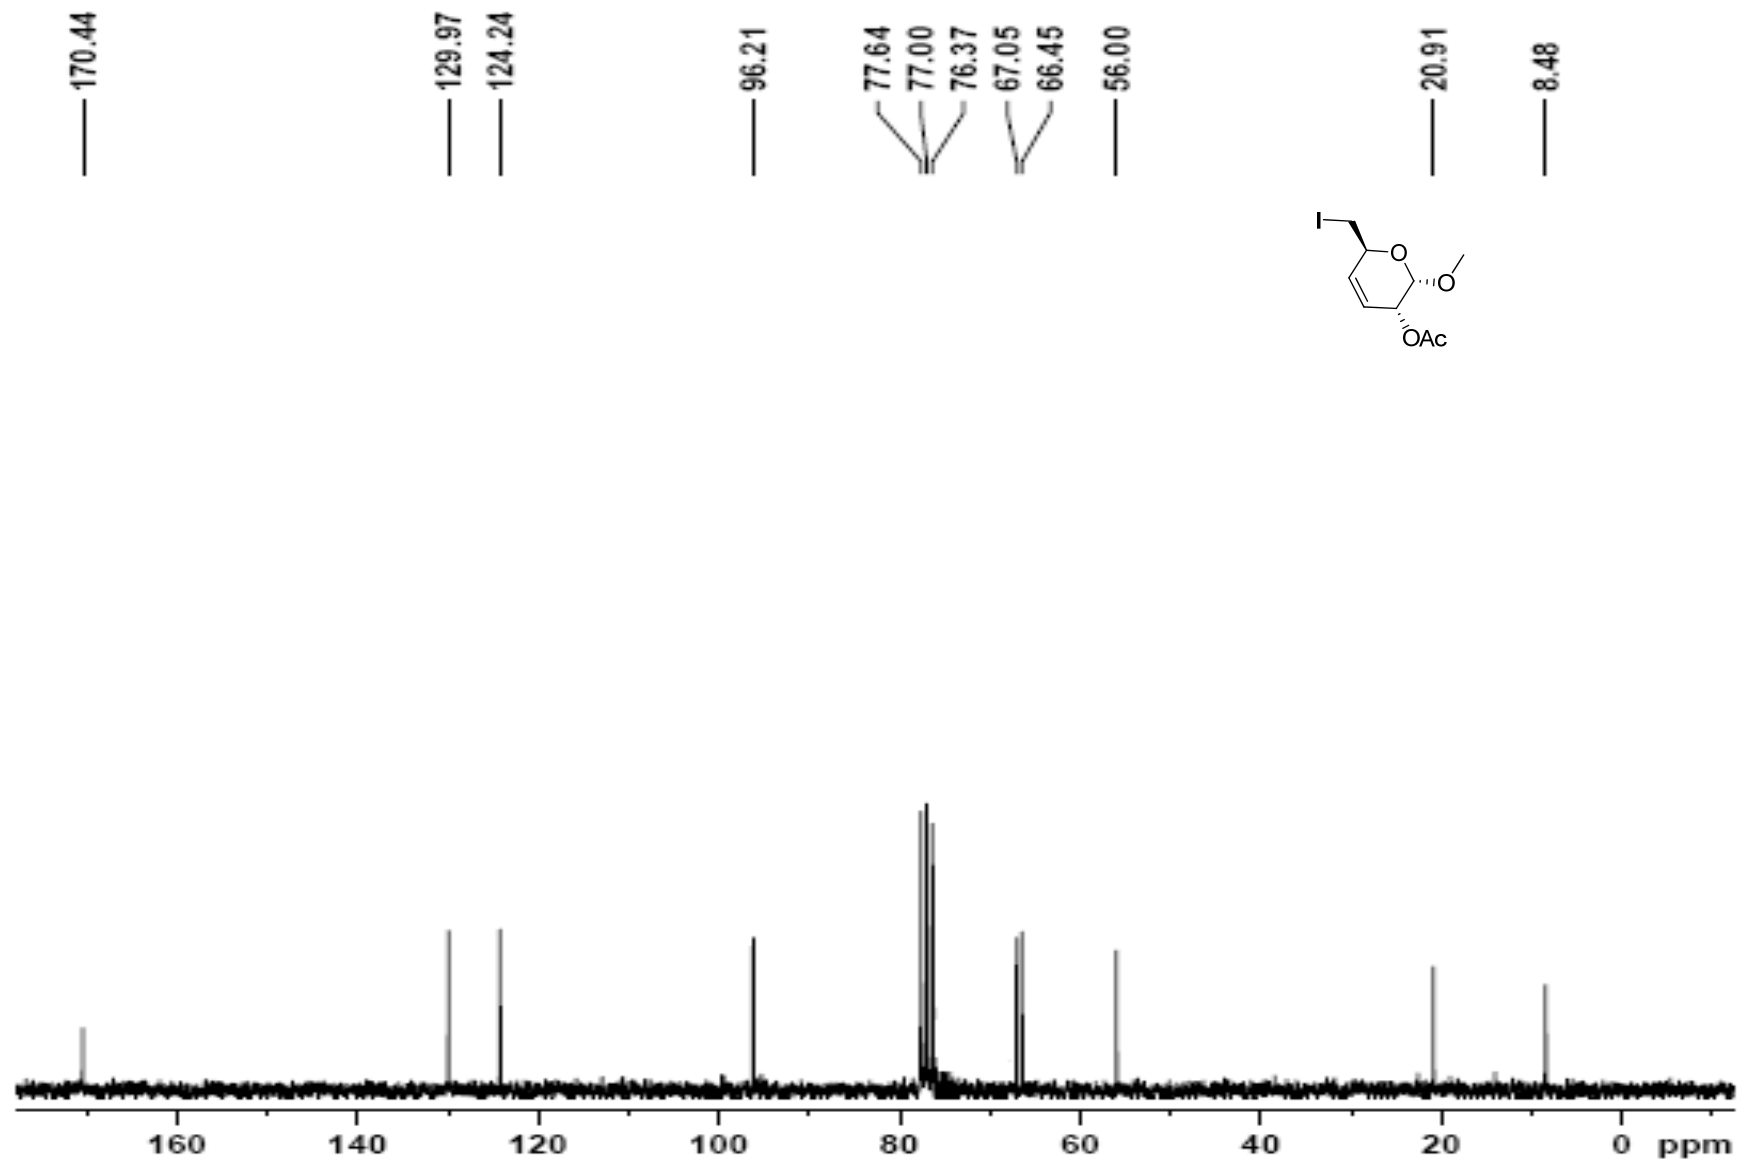

Figure 42 <sup>13</sup>C NMR spectrum of compound 28

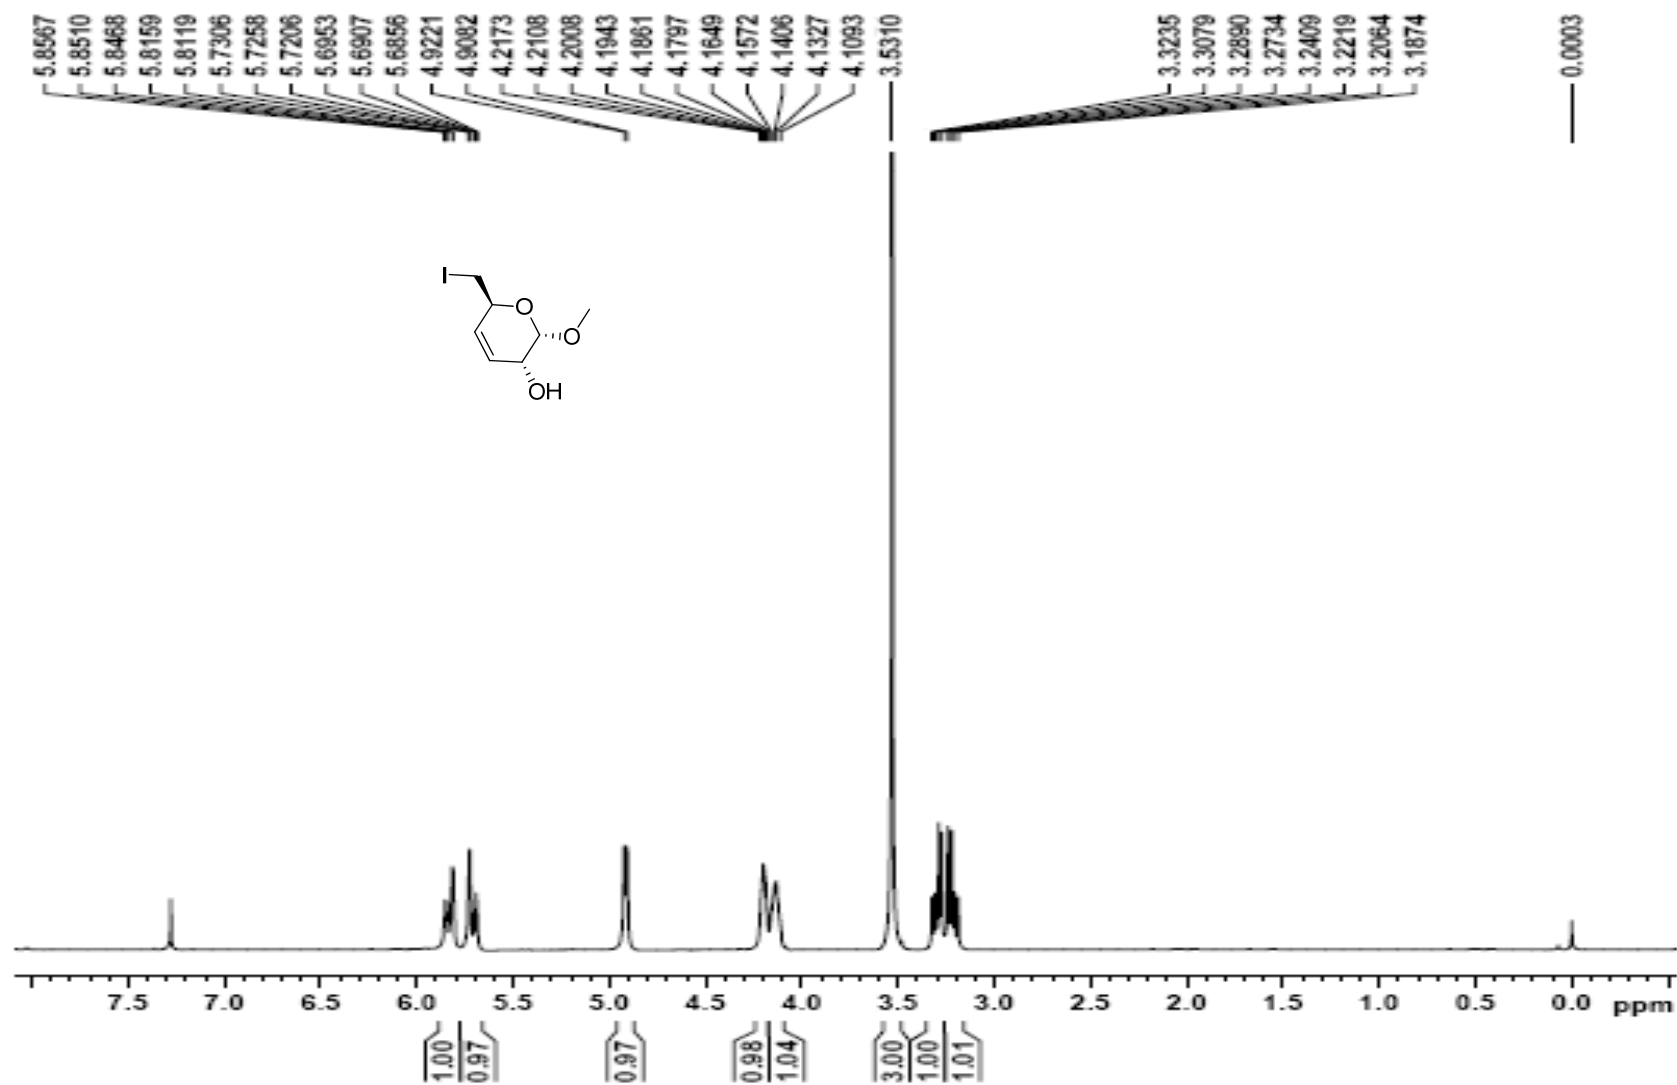

Figure 43 <sup>1</sup>H NMR spectrum of compound 29

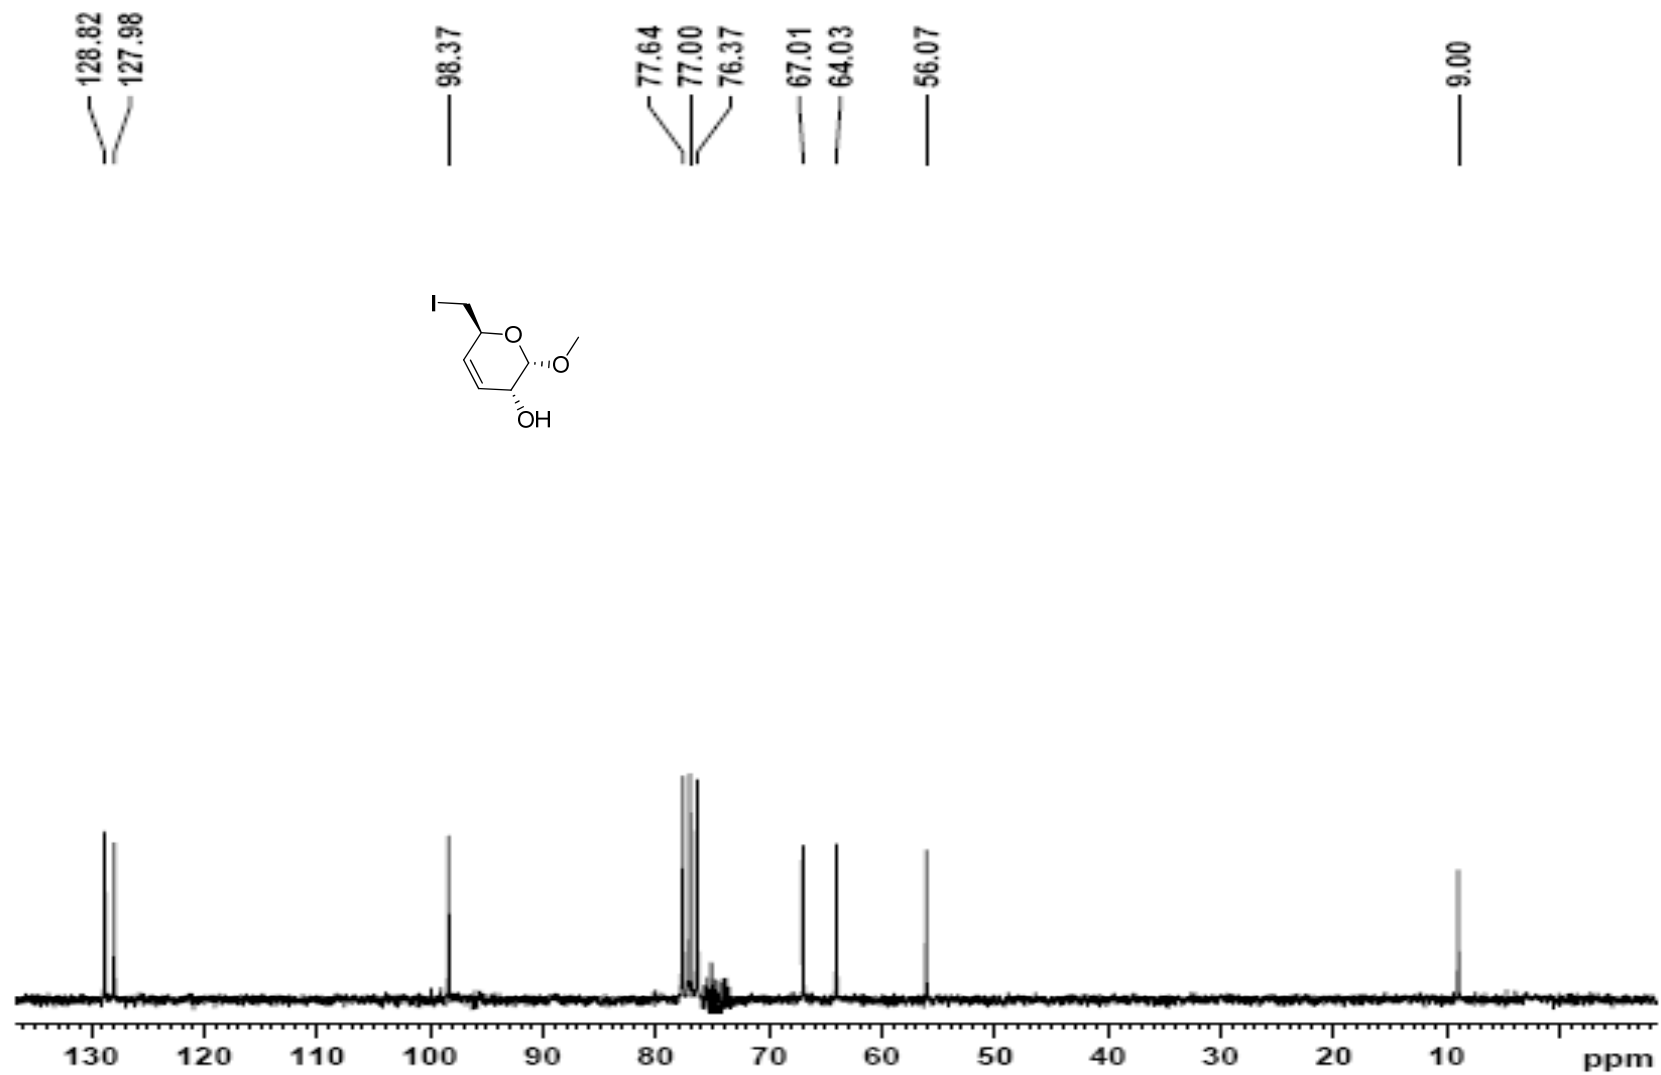

**Figure 44** <sup>13</sup>C NMR spectrum of compound **29**

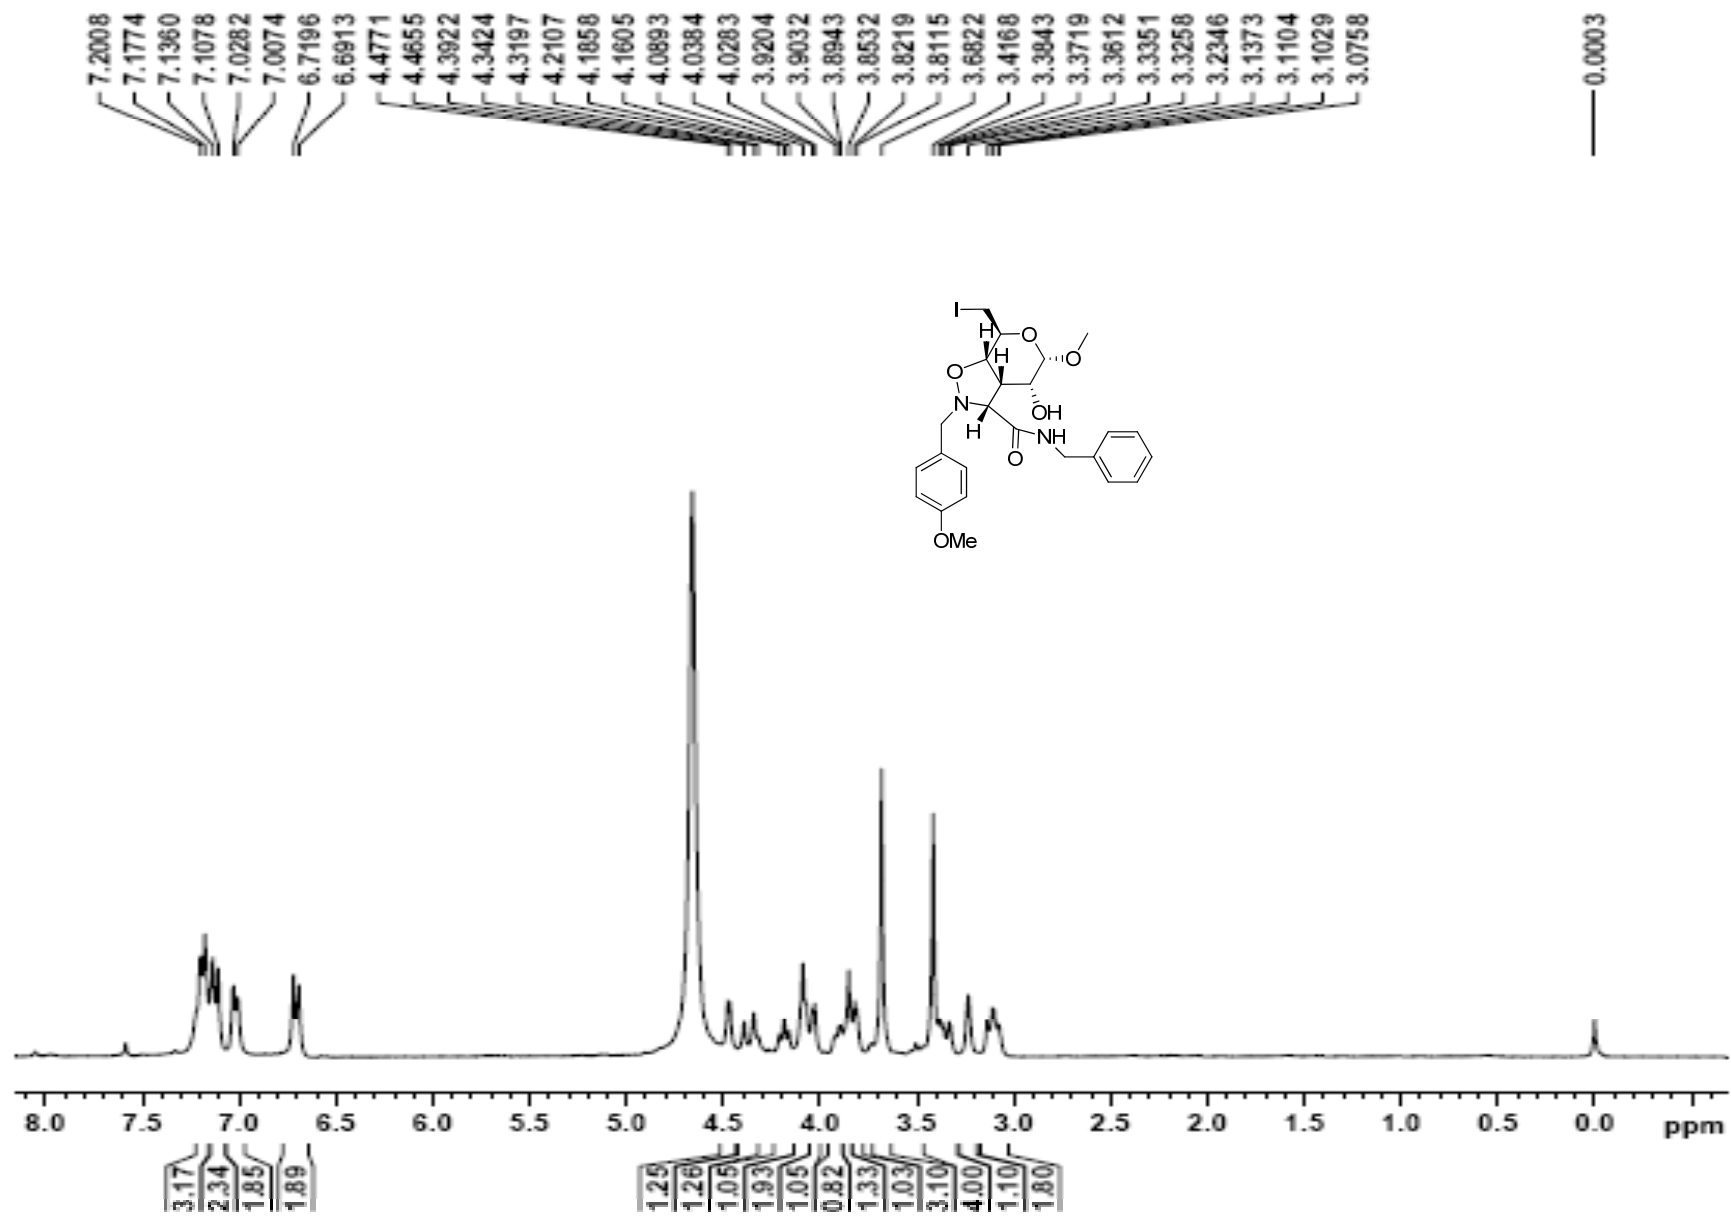

Figure 45  $^1\text{H}$  NMR spectrum of compound 30a

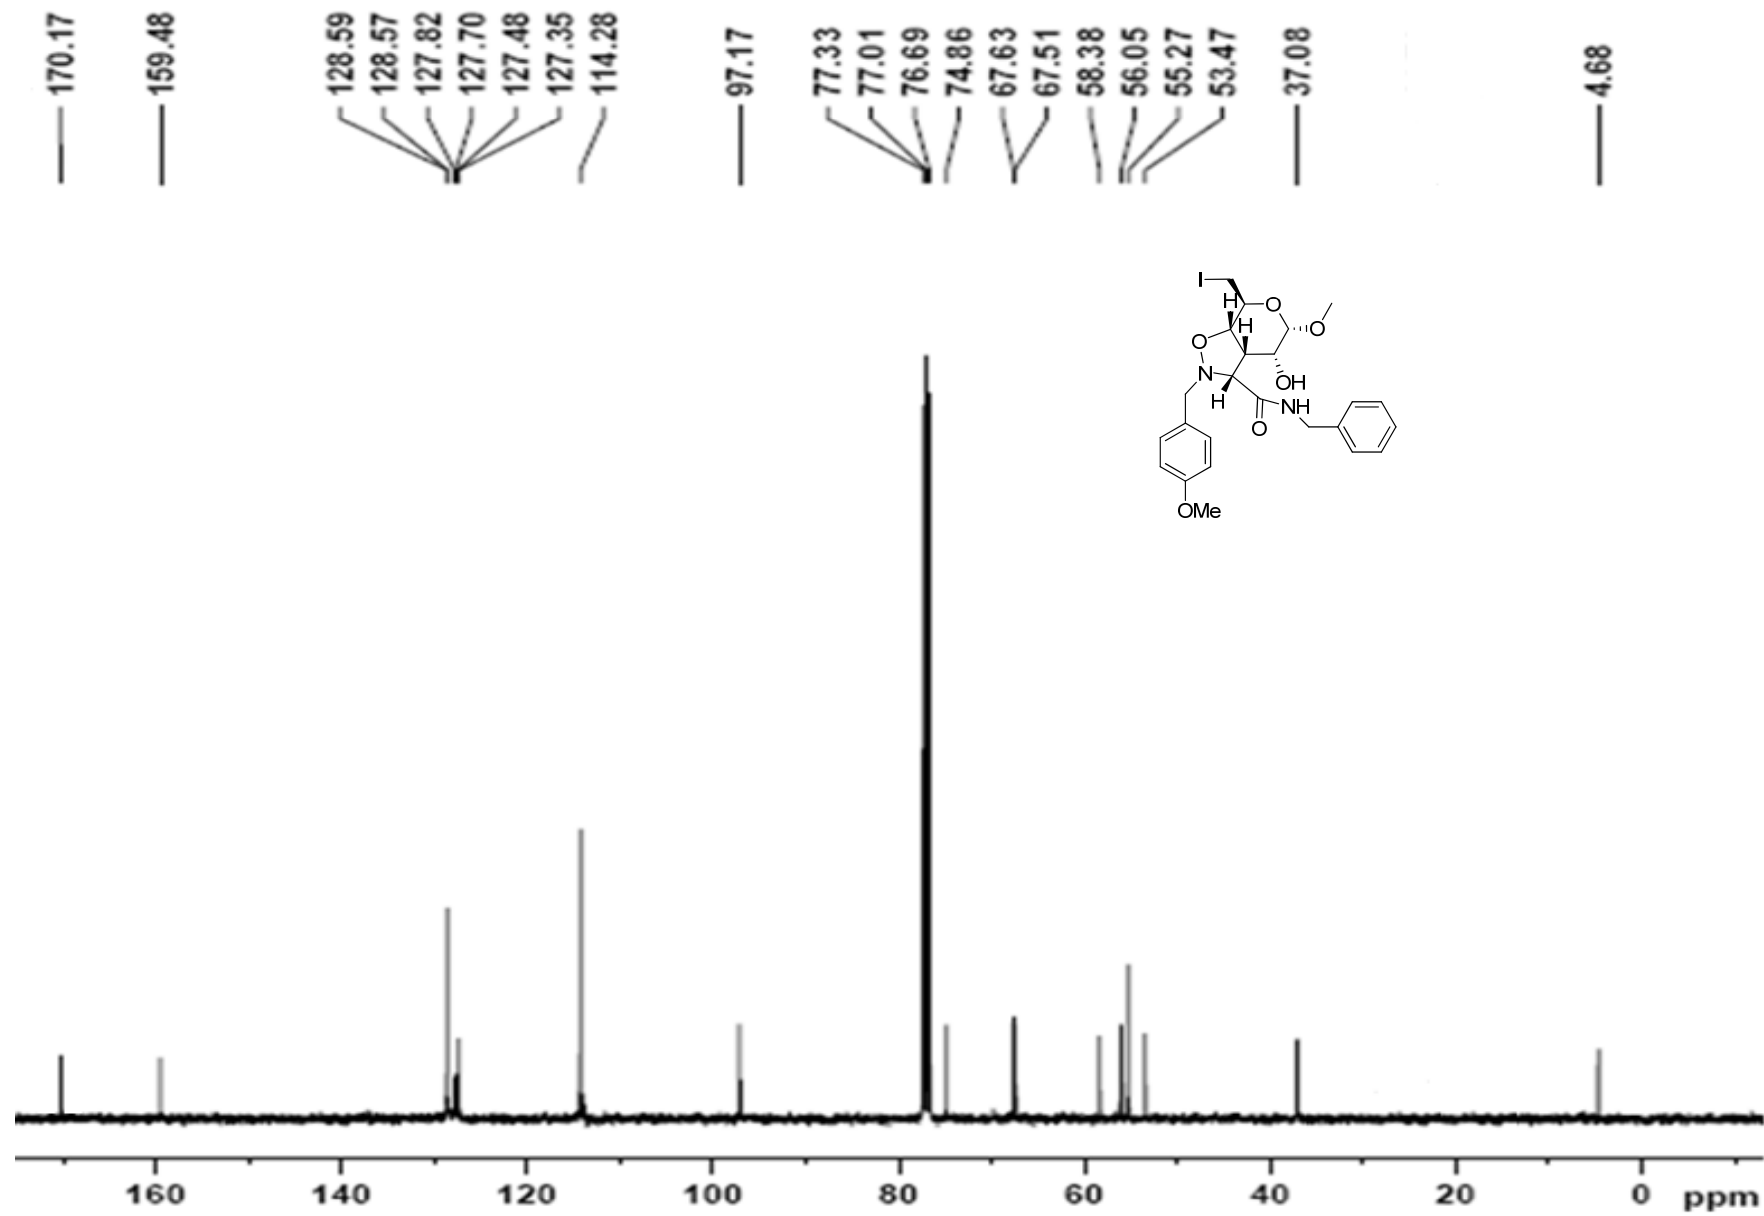

Figure 46 <sup>13</sup>C NMR spectrum of compound 30a

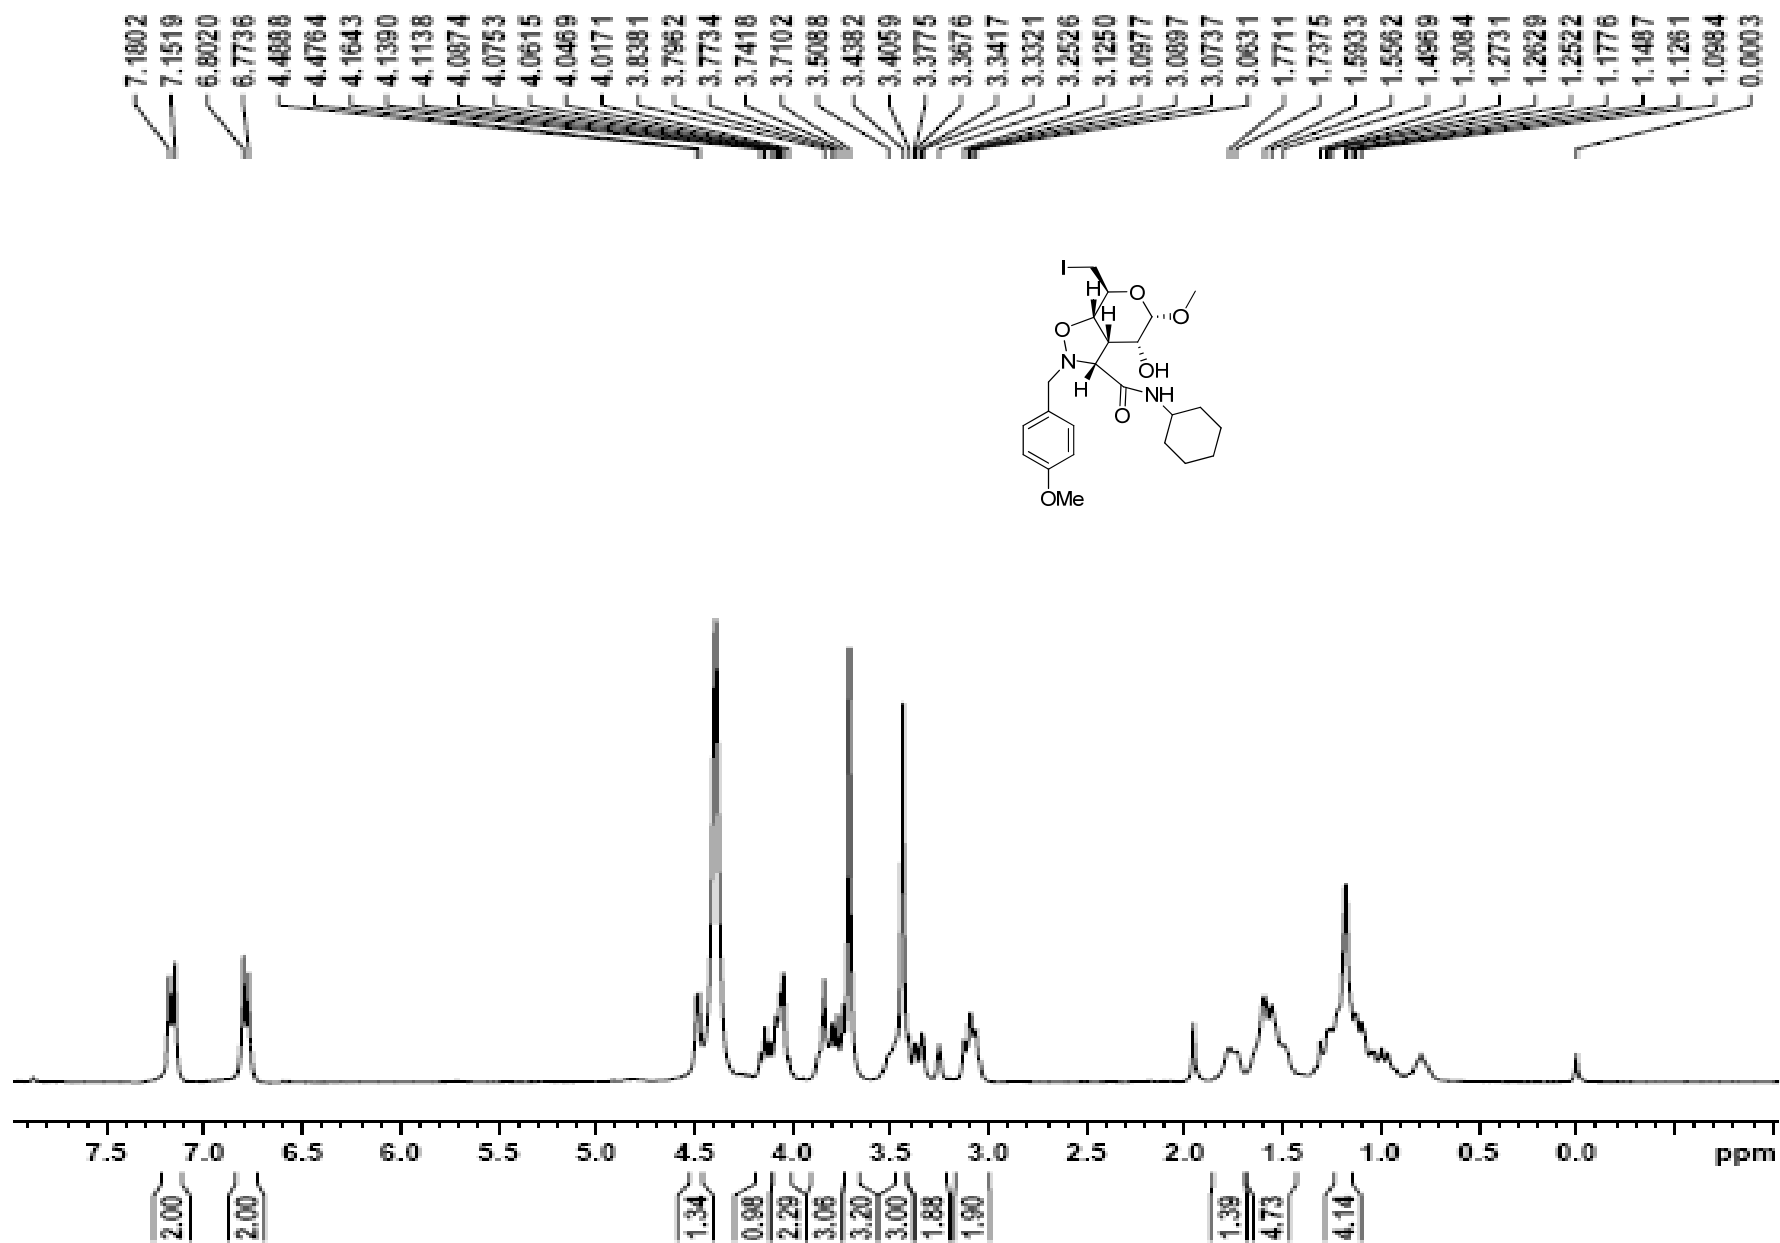

Figure 47 <sup>1</sup>H NMR spectrum of compound 30b



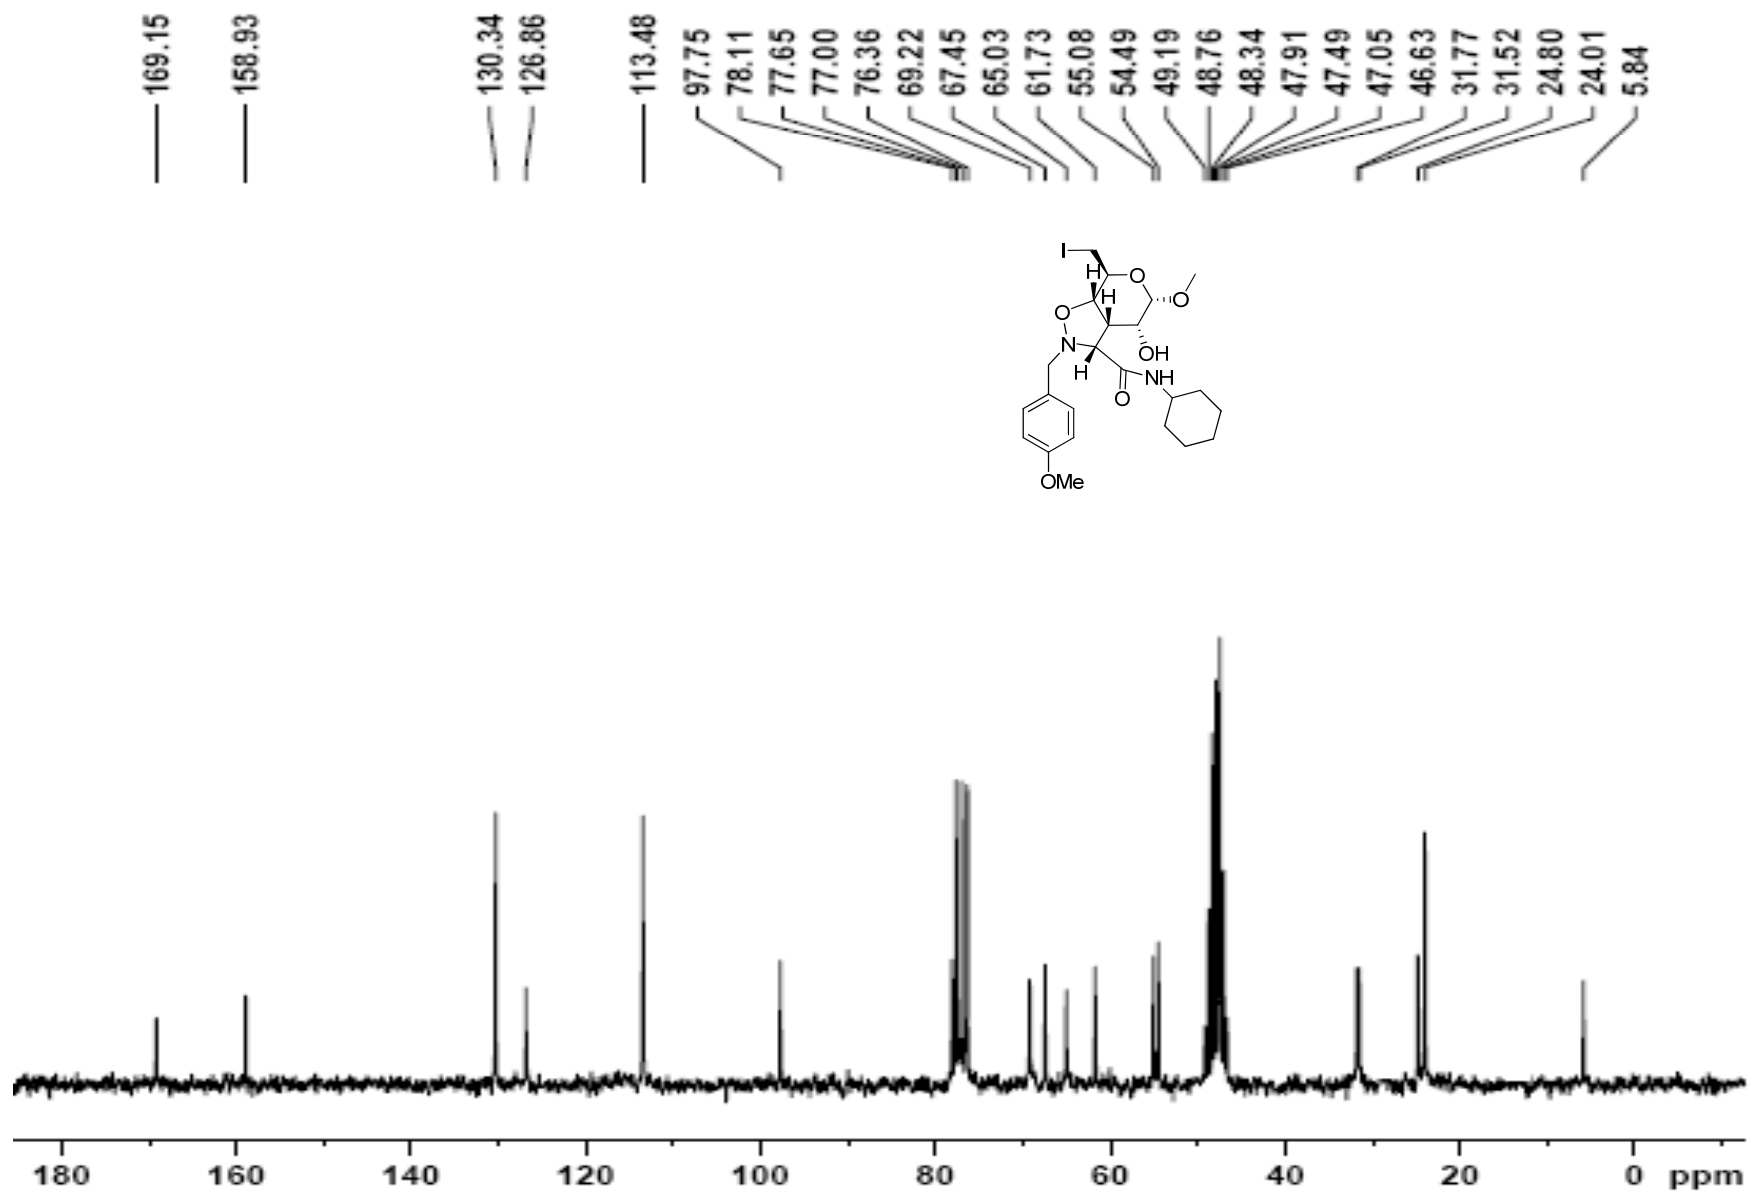

Figure 48 <sup>13</sup>C NMR spectrum of compound 30b

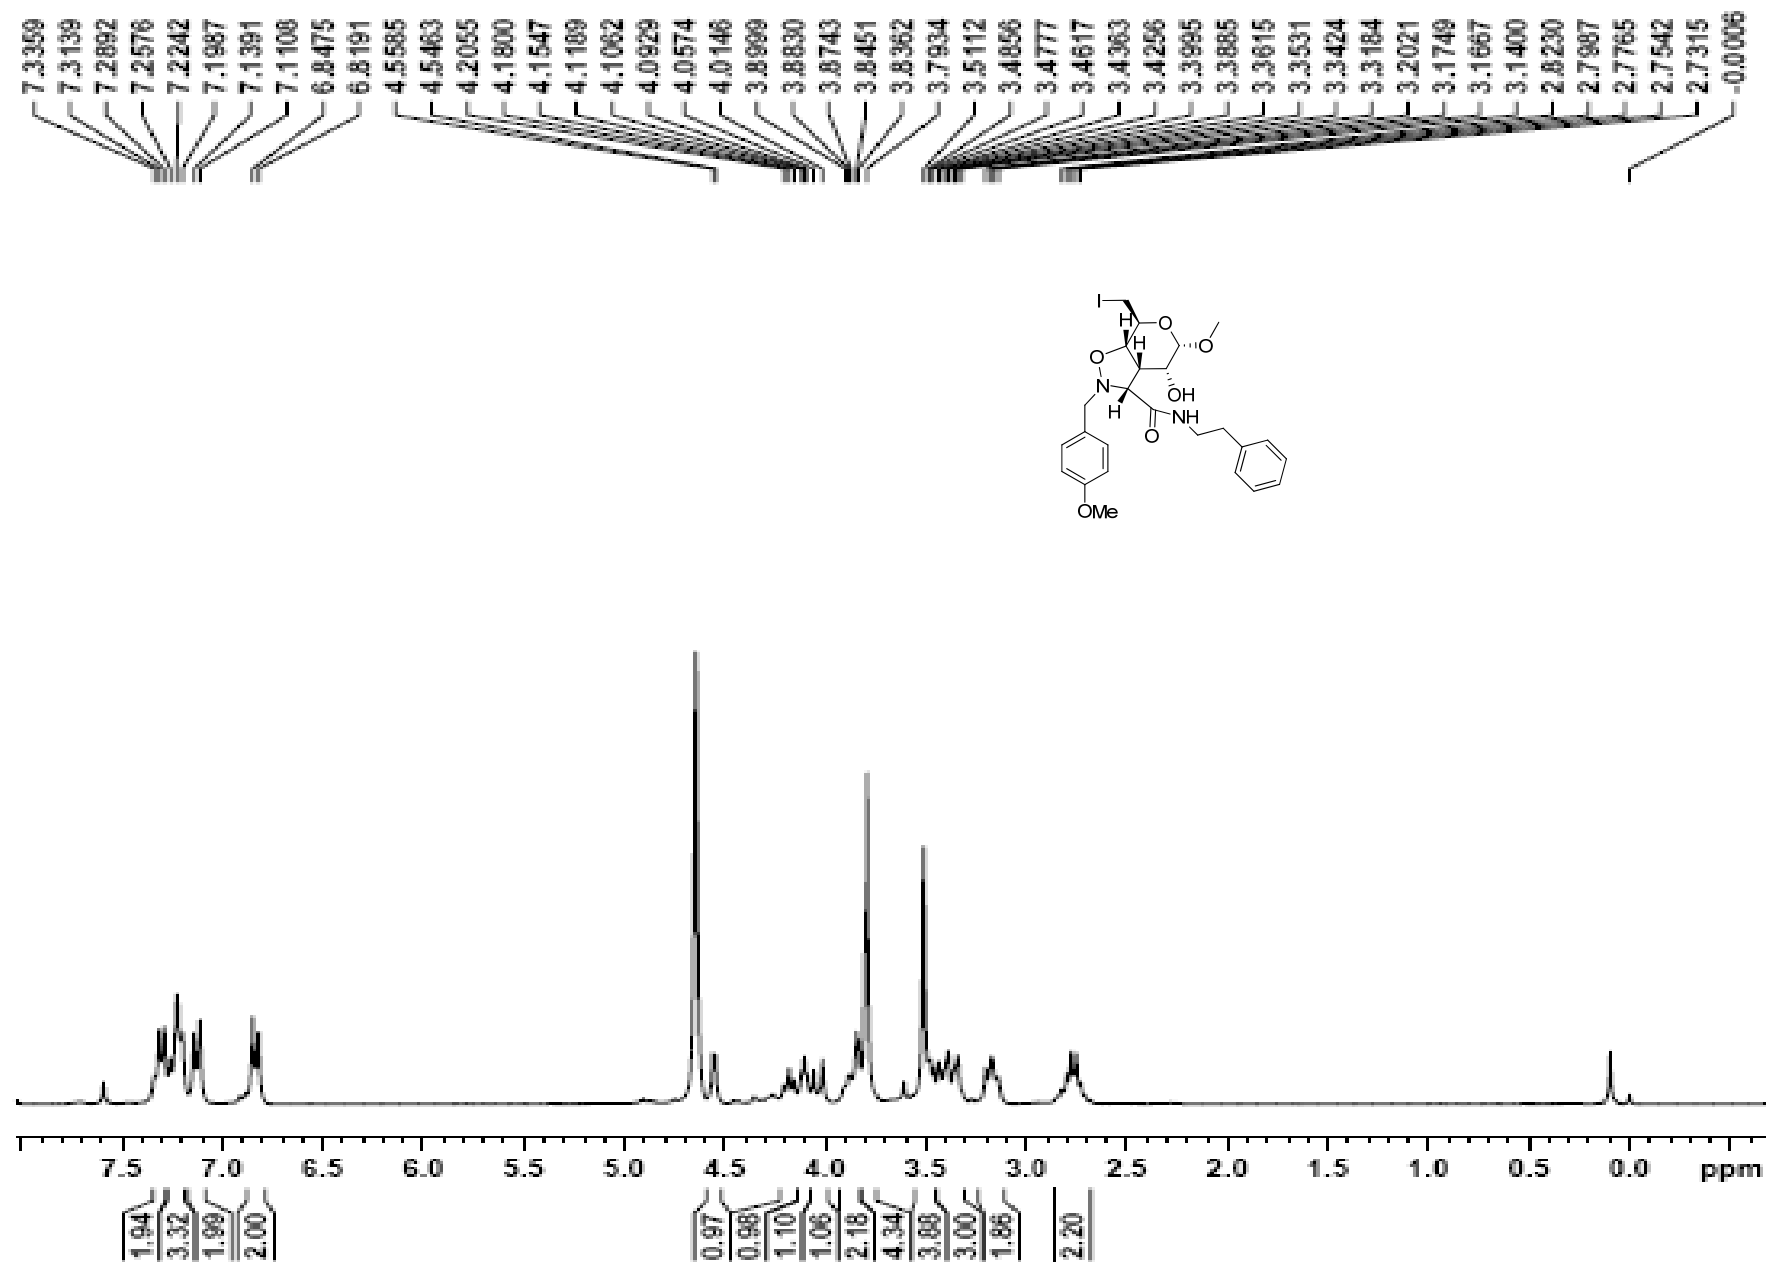

Figure 49 <sup>1</sup>H NMR spectrum of compound 30c

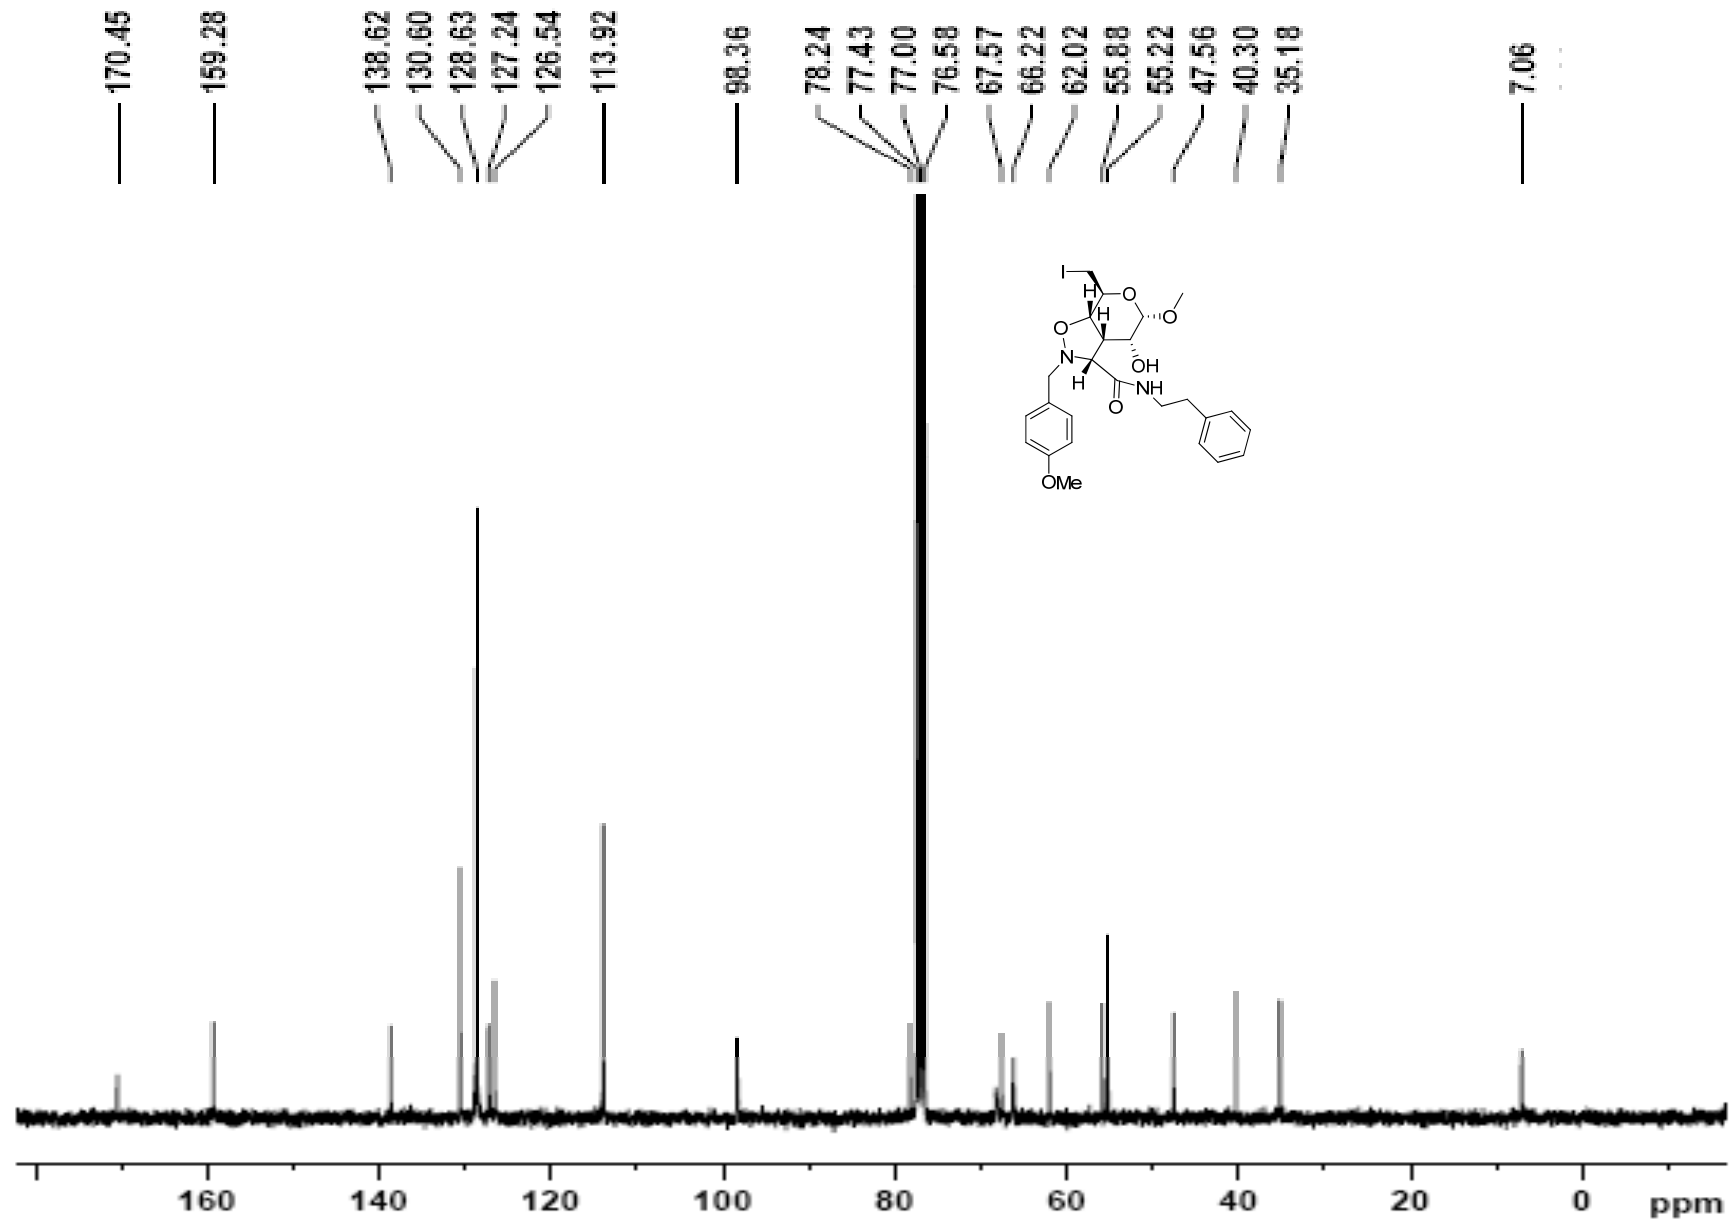

Figure 50  $^{13}\text{C}$  NMR spectrum of compound 30c

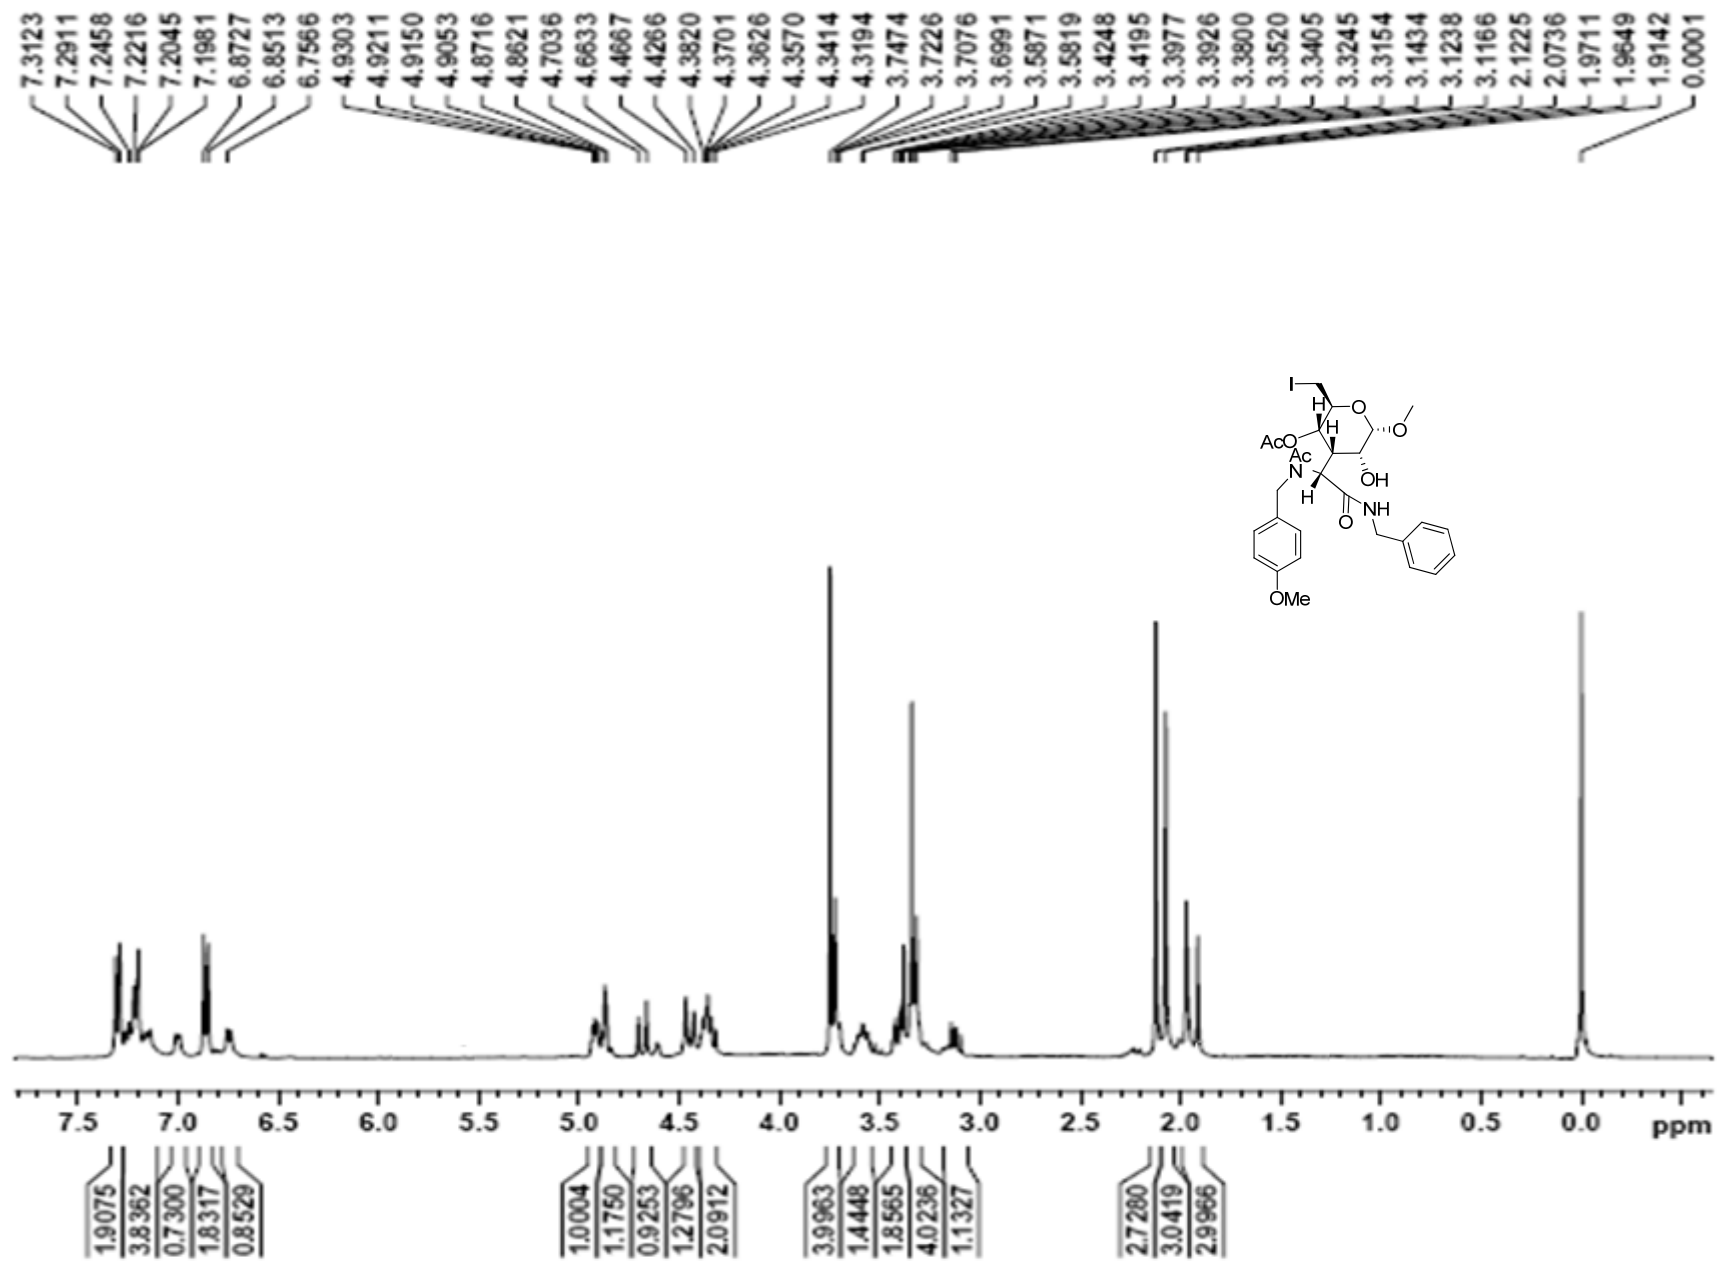

Figure 51 <sup>1</sup>H NMR spectrum of compound 32a

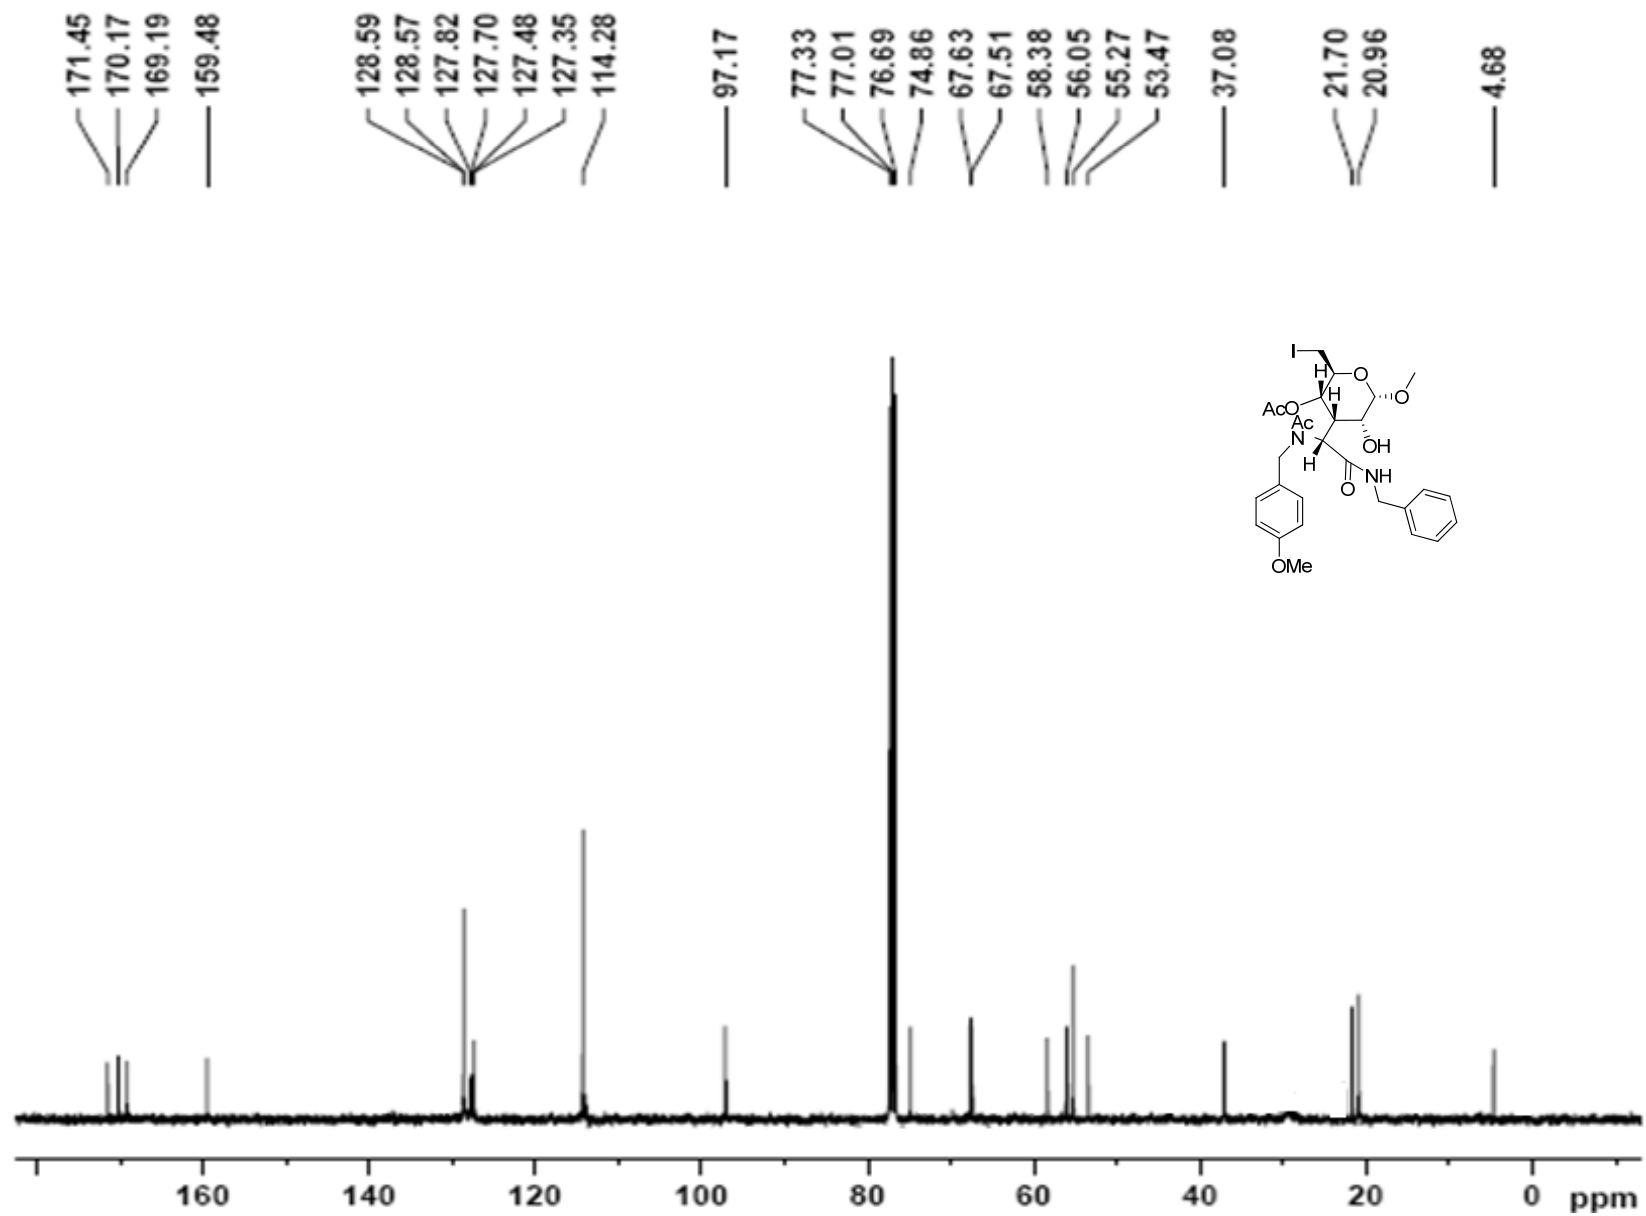

Figure 52 <sup>13</sup>C NMR spectrum of compound 32a

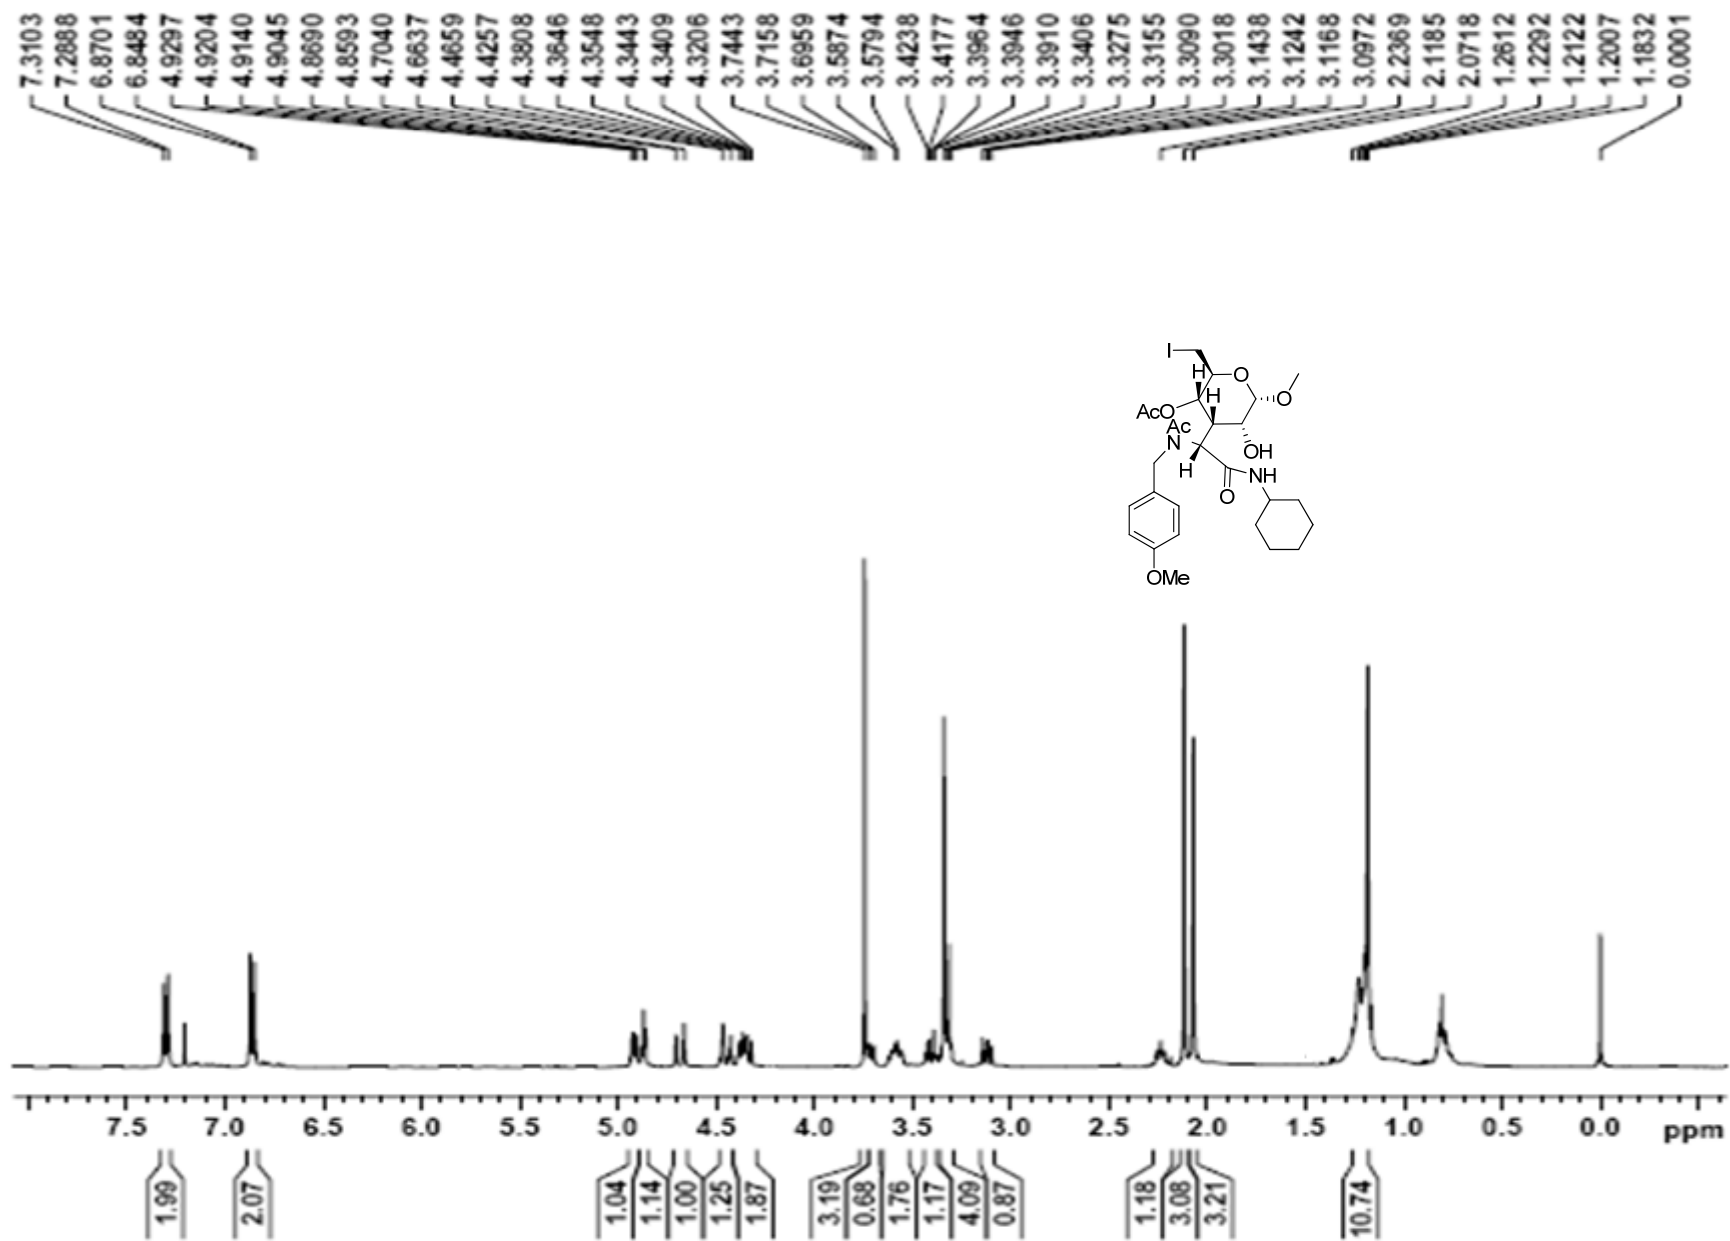

**Figure 53**  $^1\text{H}$  NMR spectrum of compound **32b**

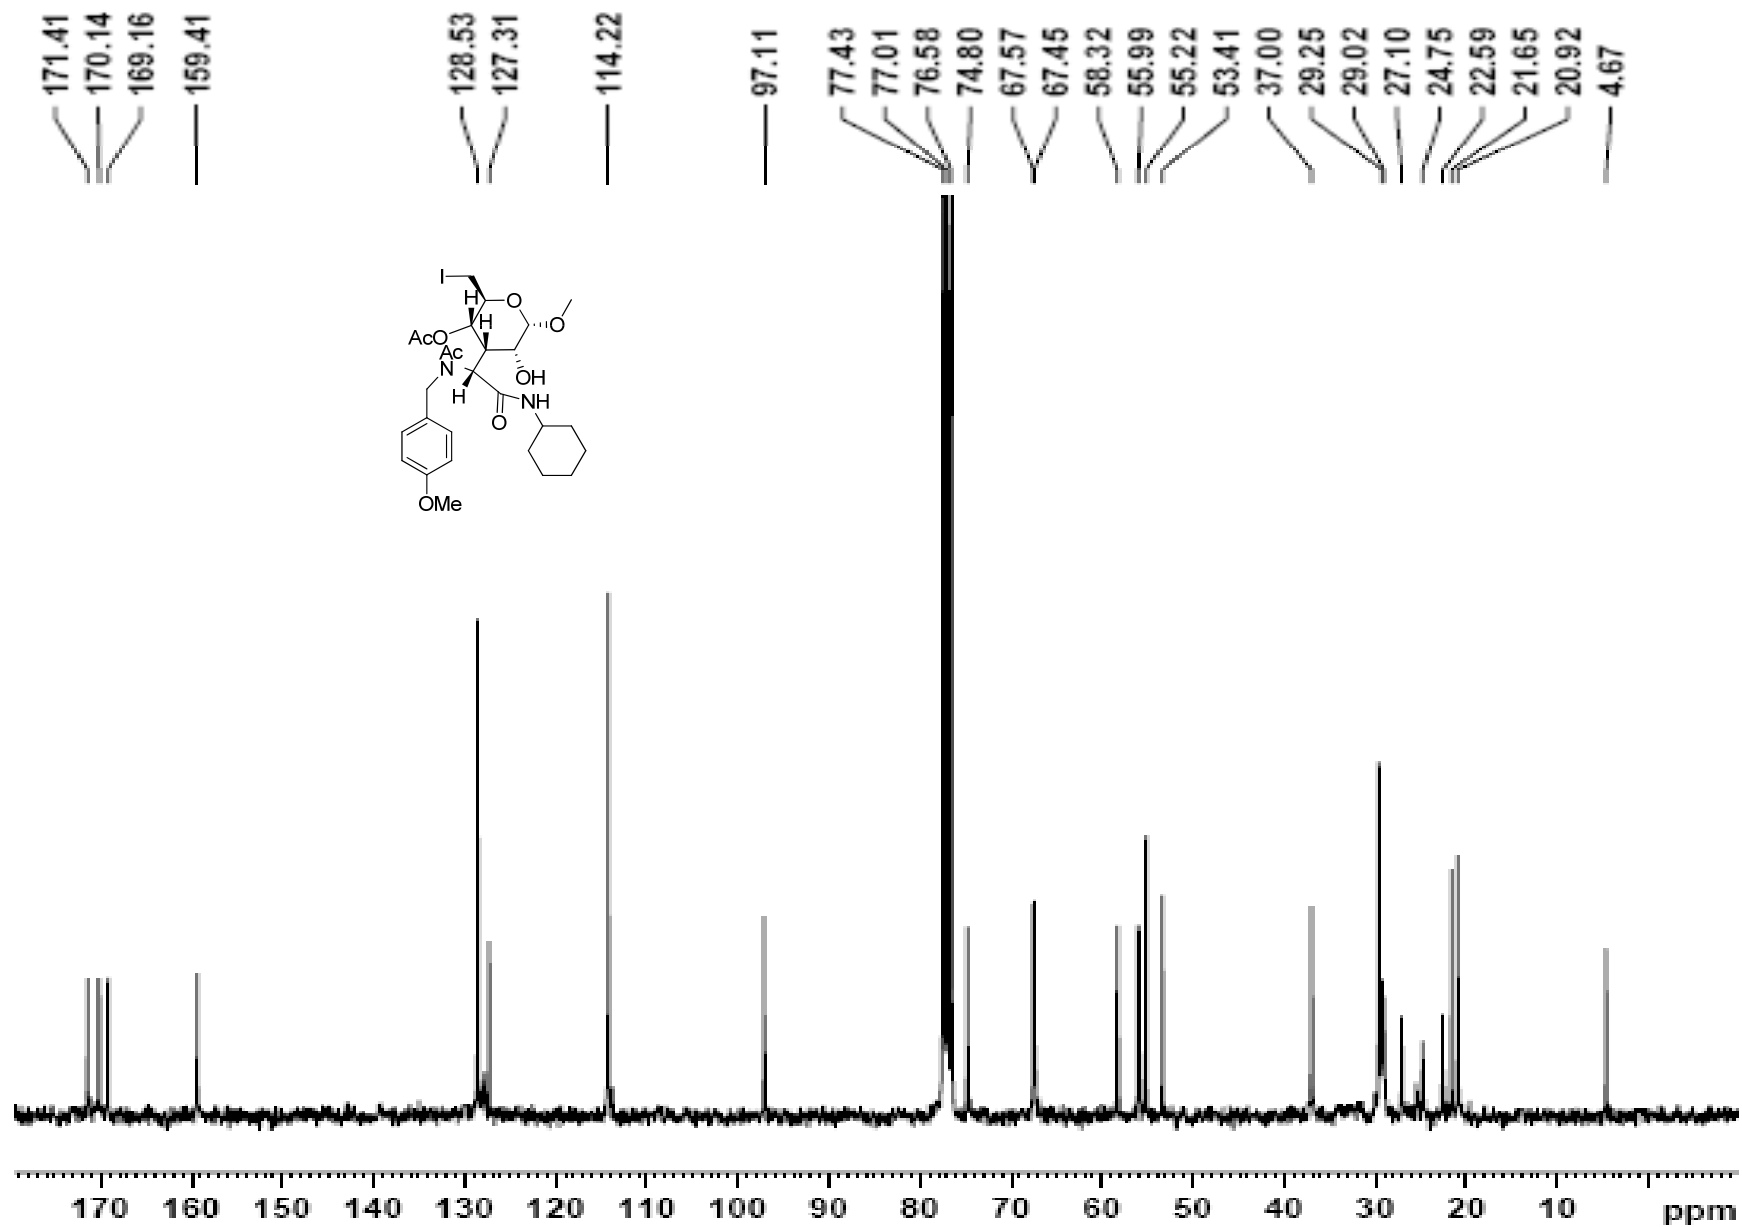

**Figure 54**  $^{13}\text{C}$  NMR spectrum of compound **32b**

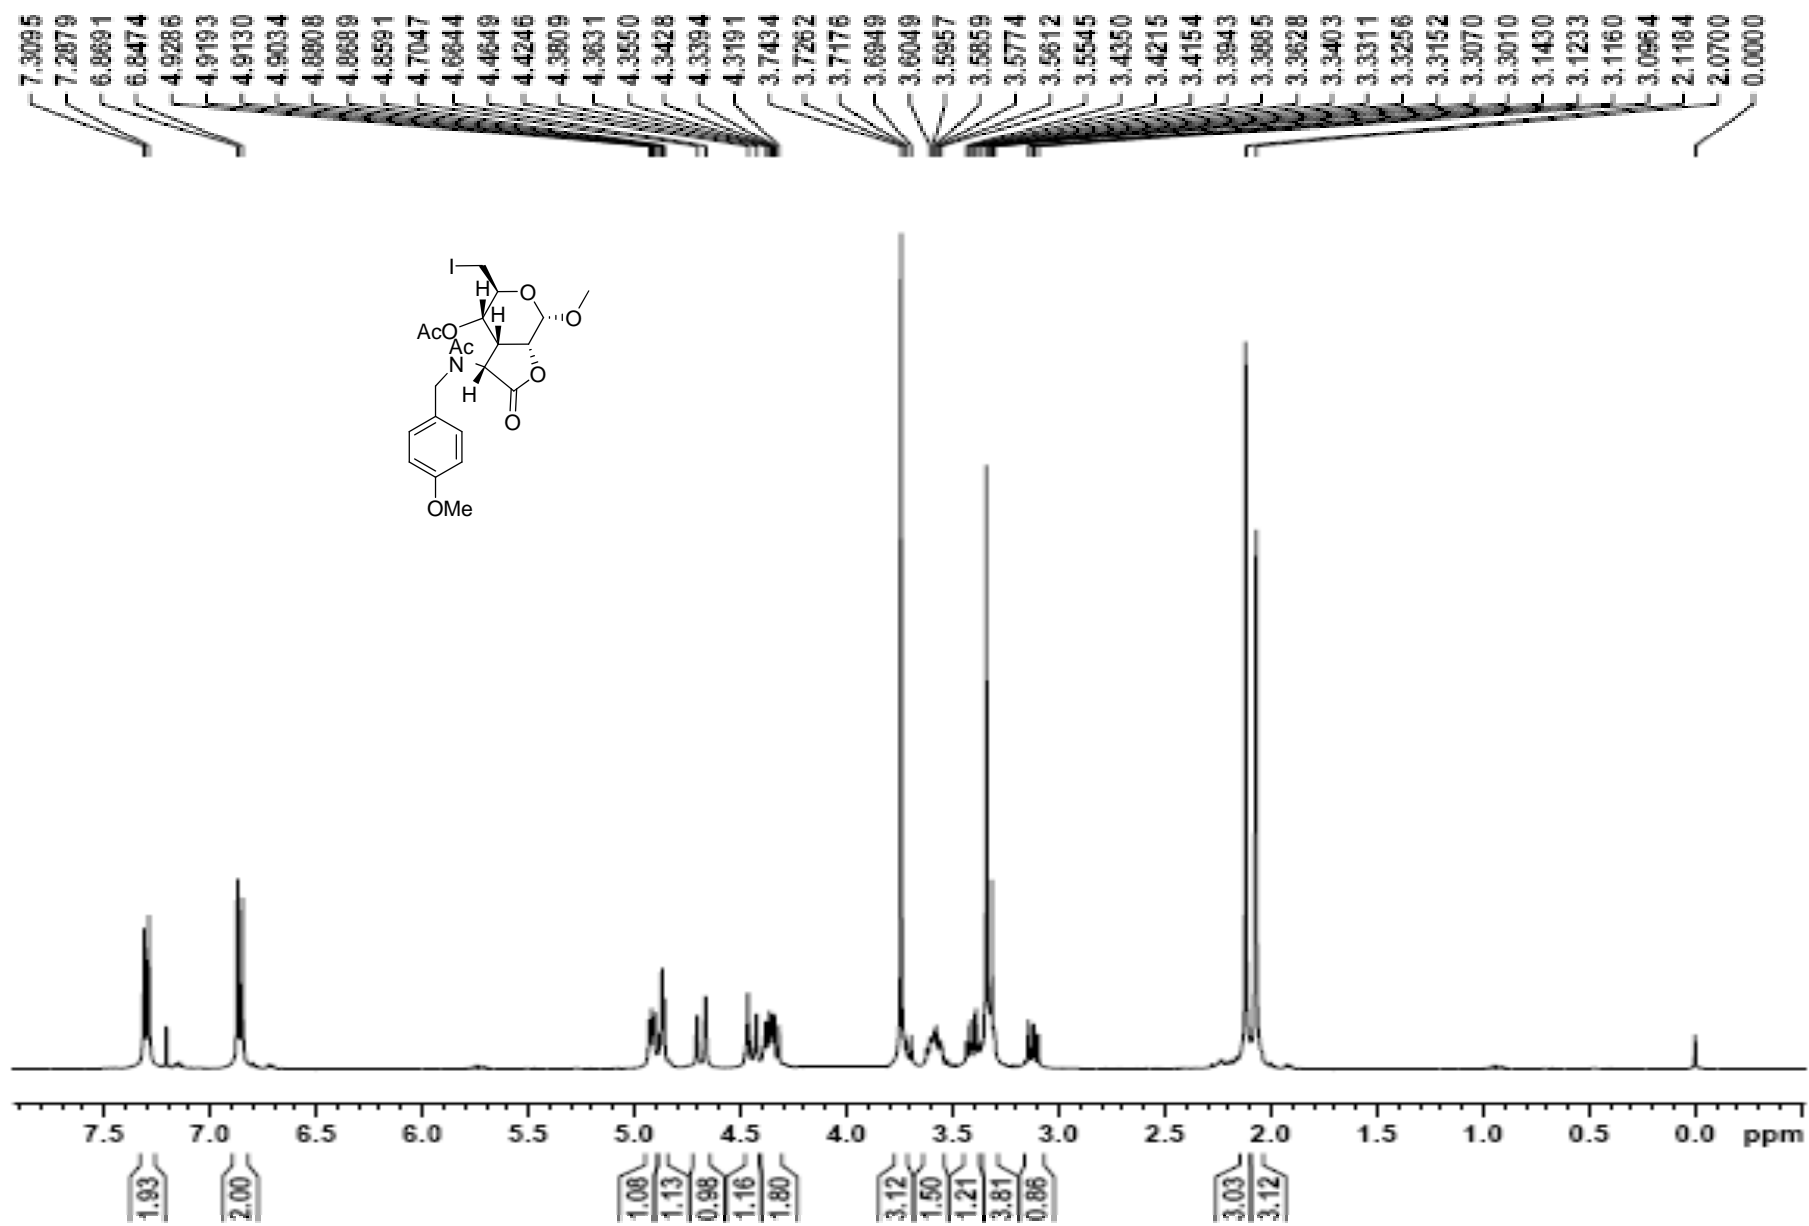

Figure 55 <sup>1</sup>H NMR spectrum of compound 34



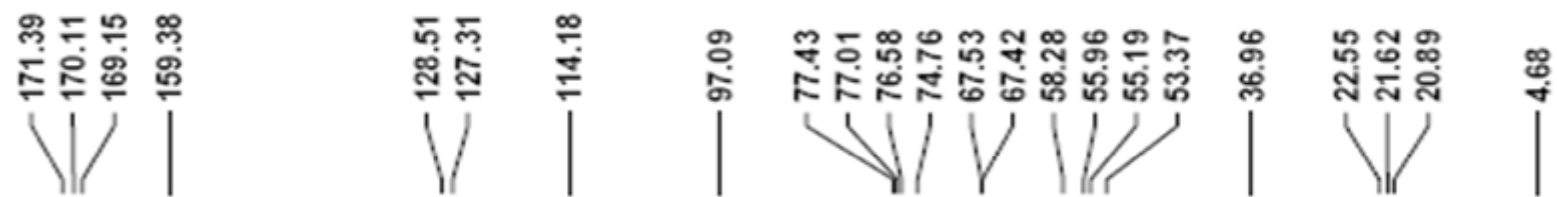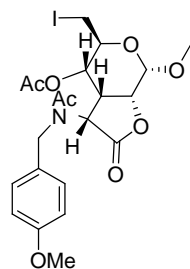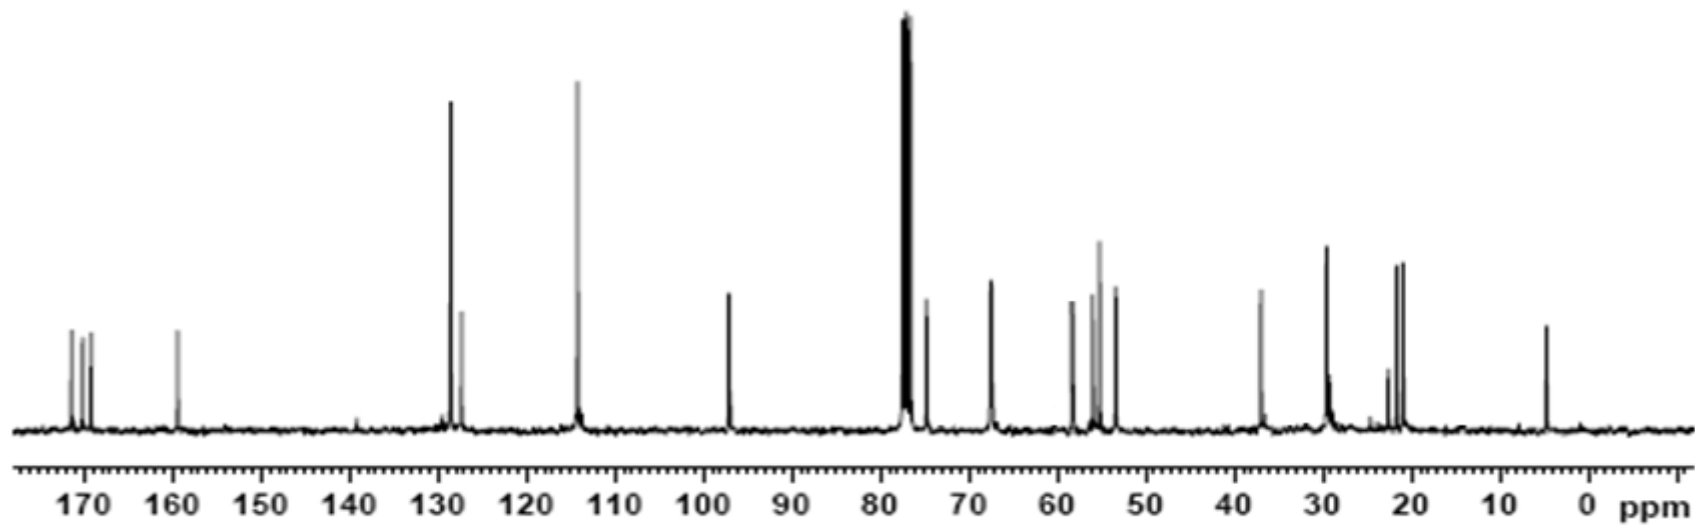

Figure 56  $^{13}\text{C}$  NMR spectrum of compound 34

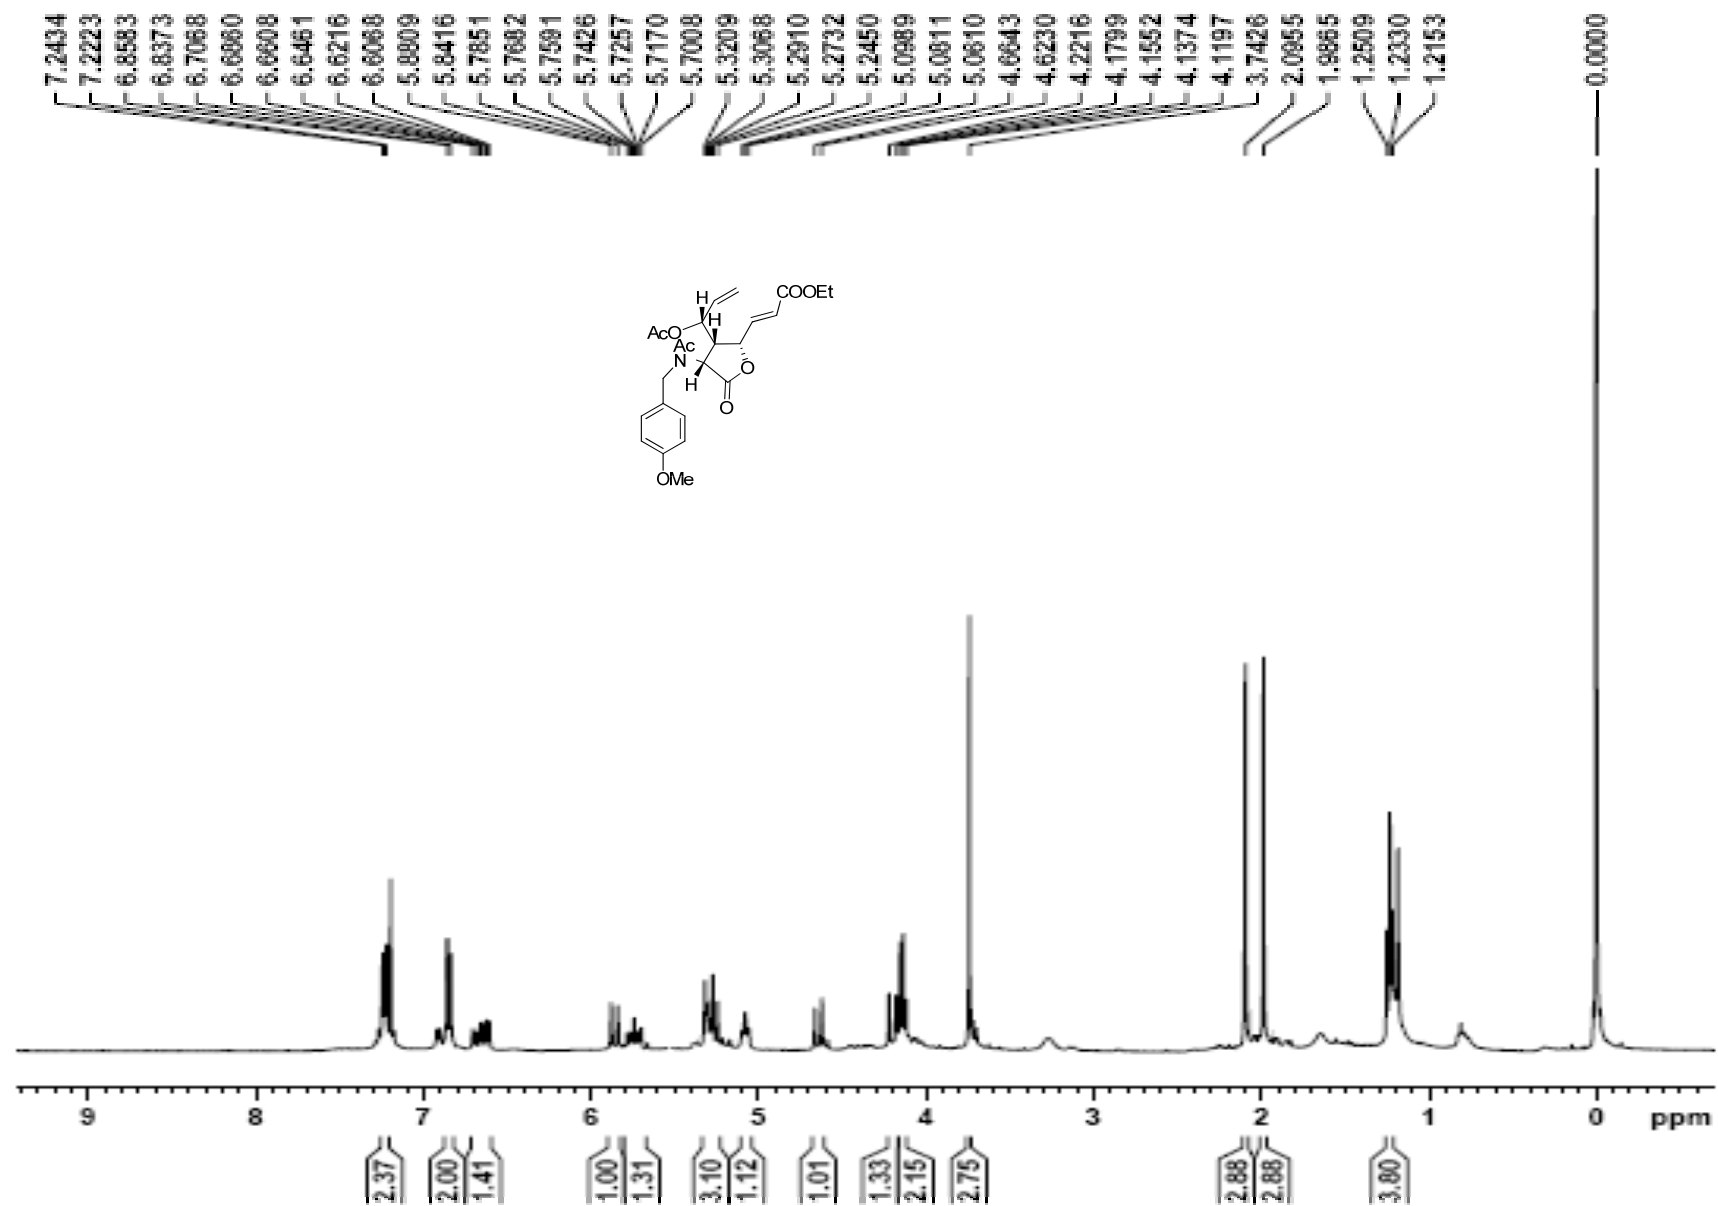

Figure 57 <sup>1</sup>H NMR spectrum of compound 36

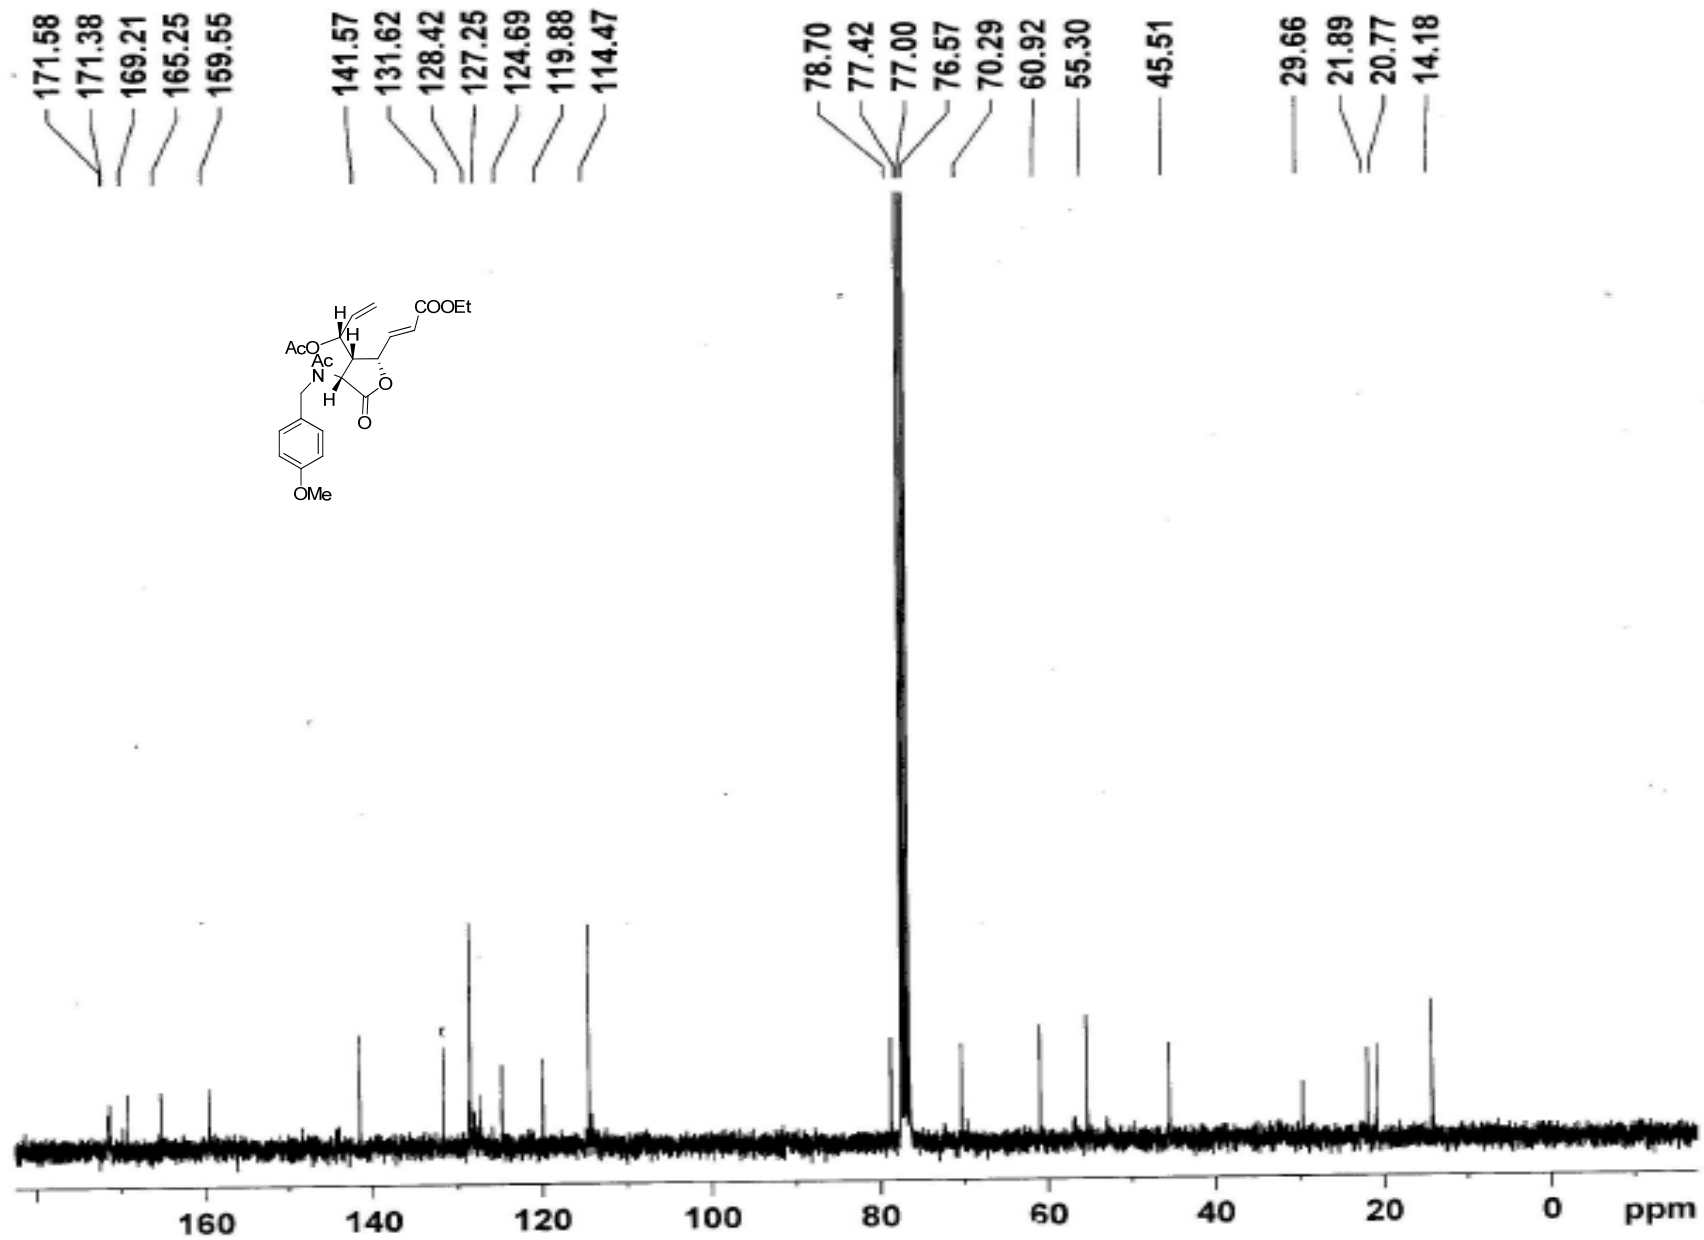

Figure 58  $^{13}\text{C}$  NMR spectrum of compound 36

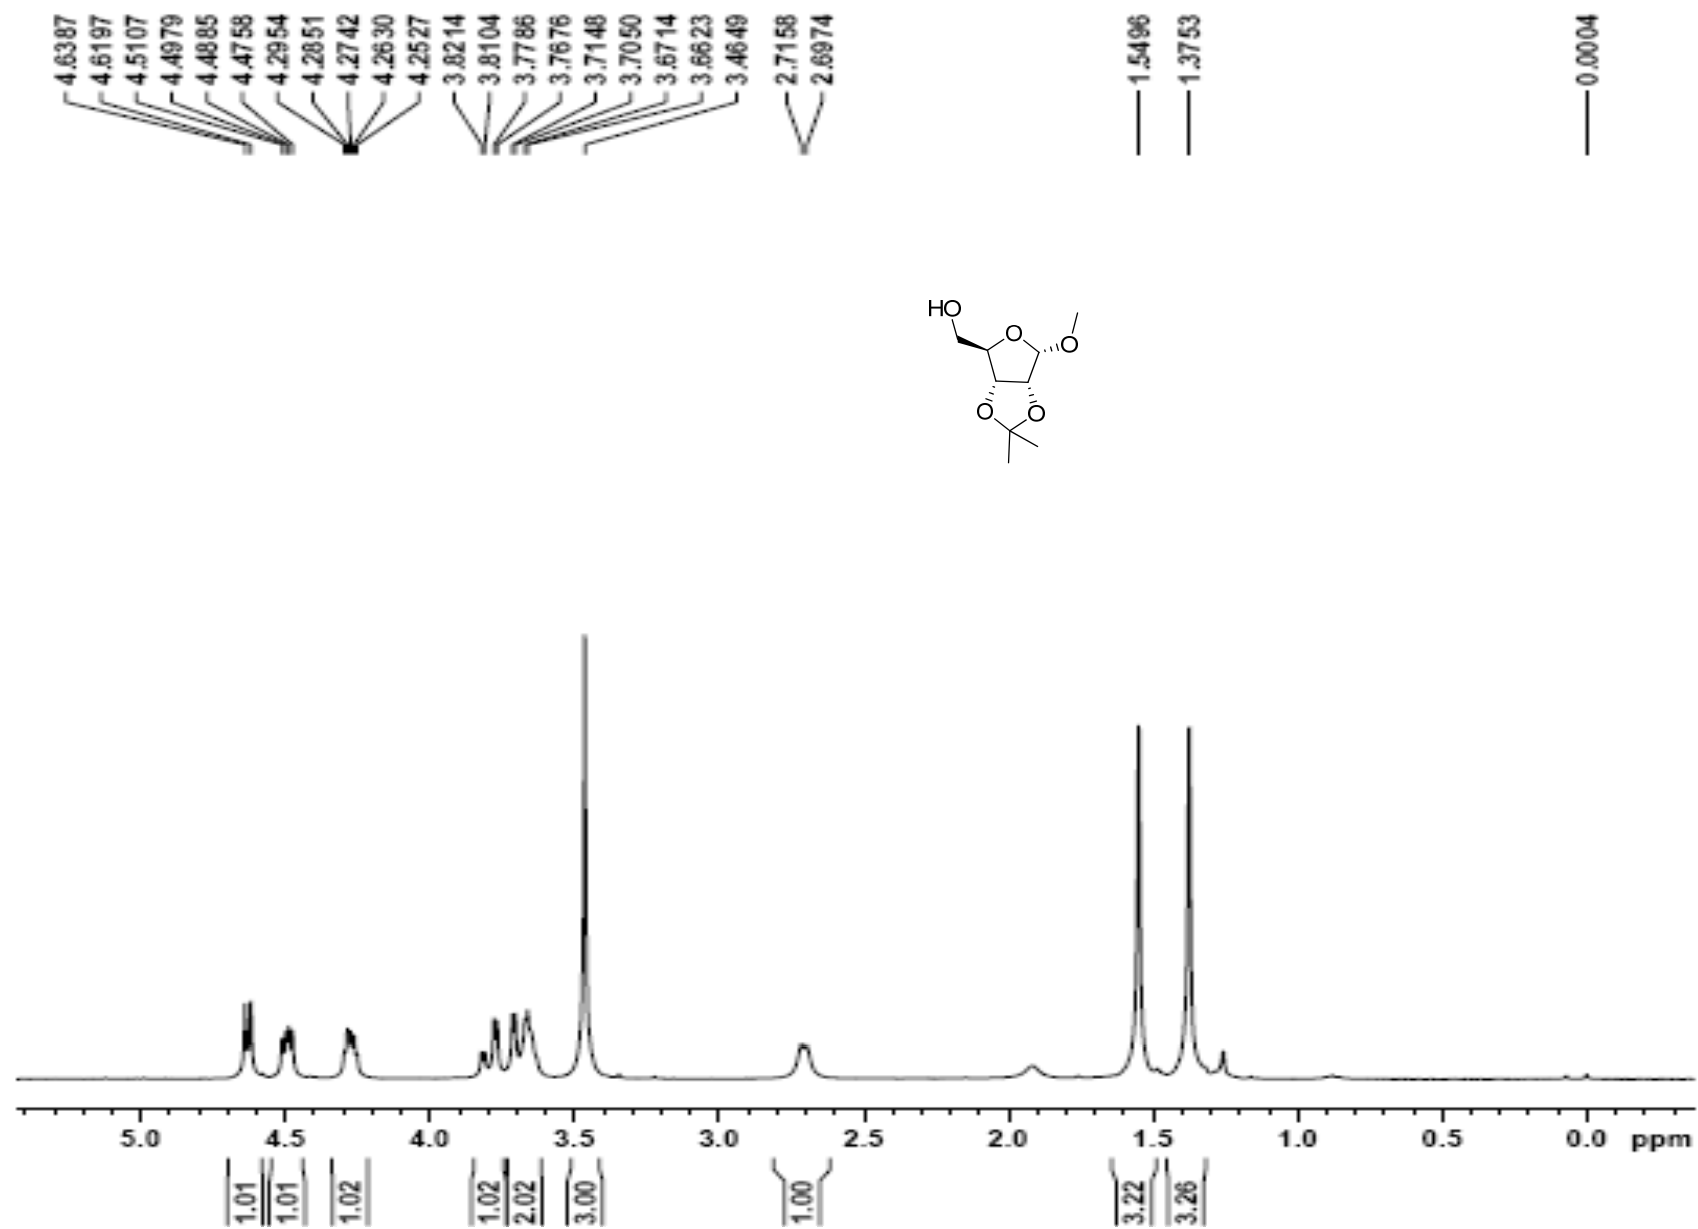

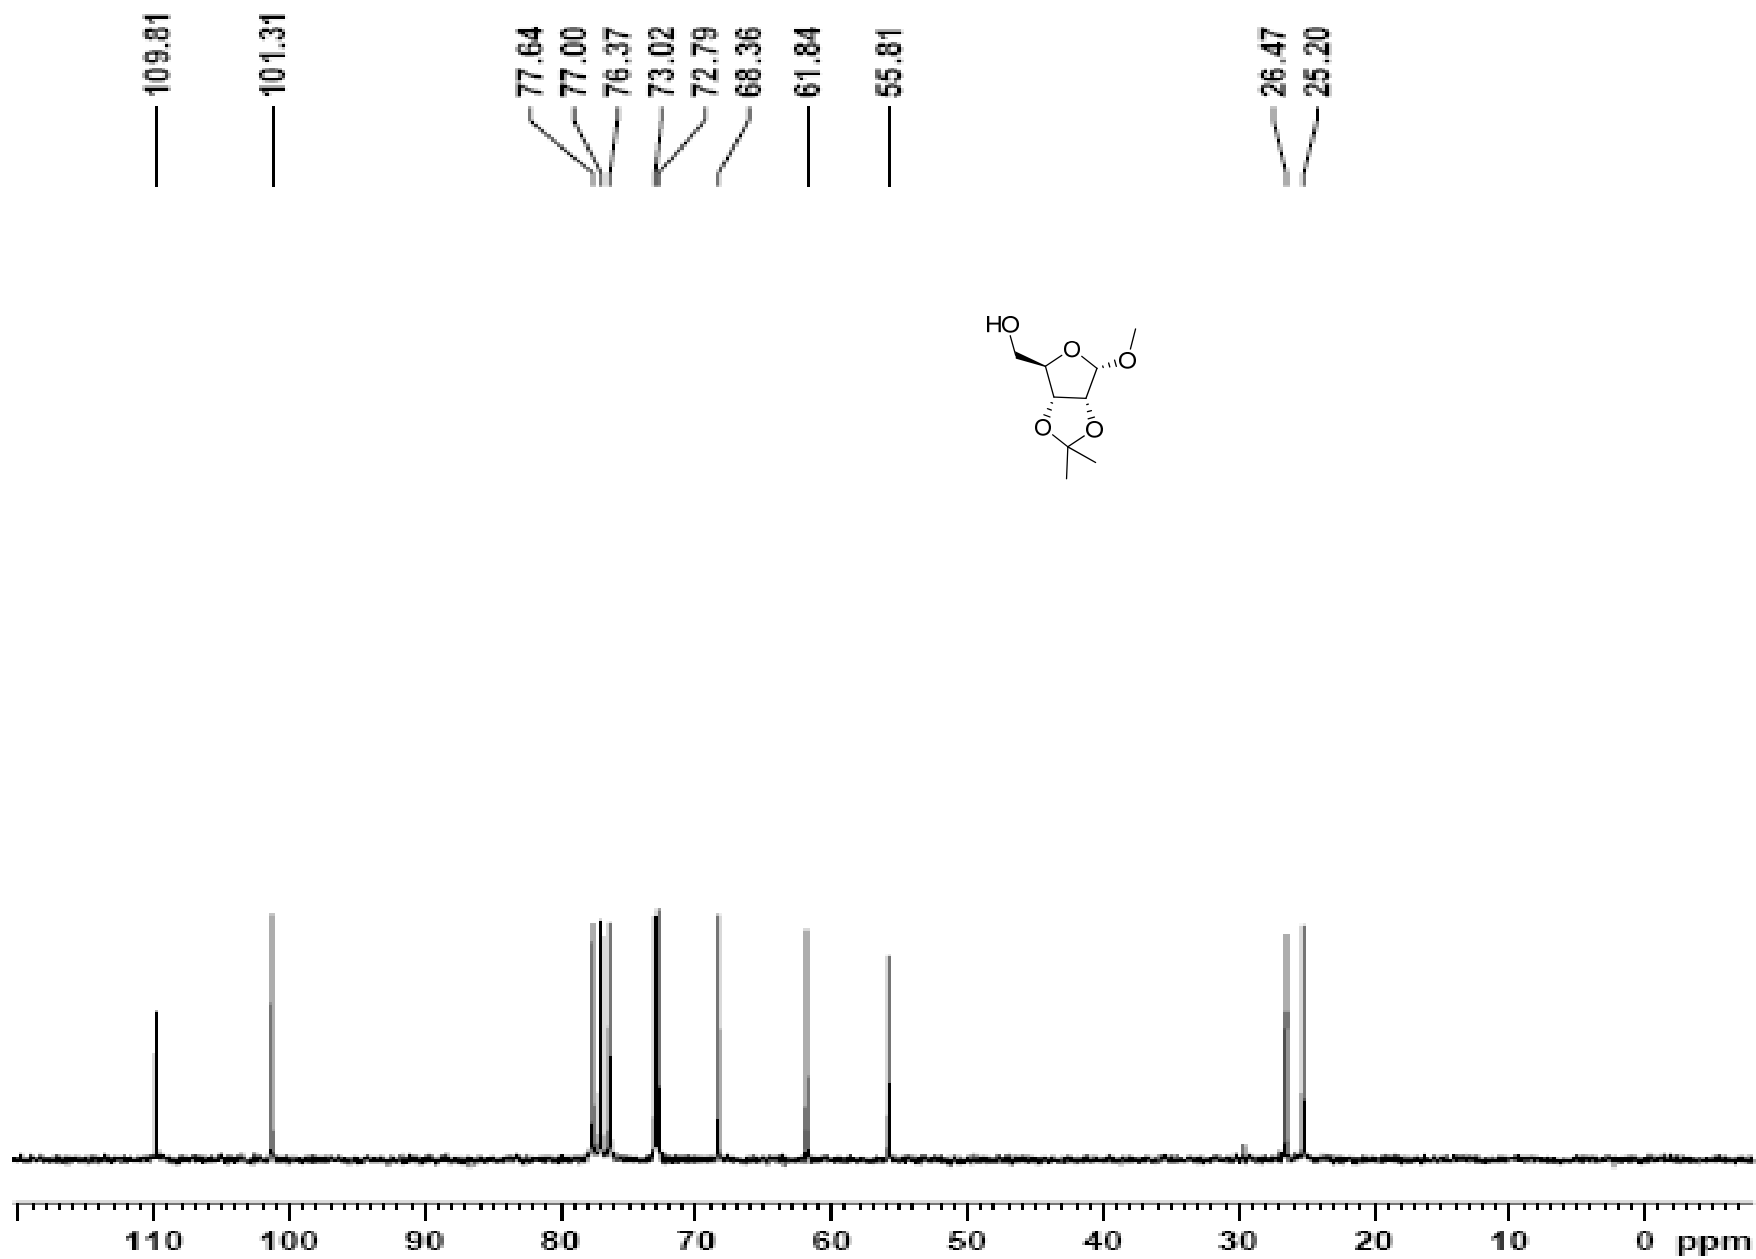

Figure 60  $^{13}\text{C}$  NMR spectrum of compound 38

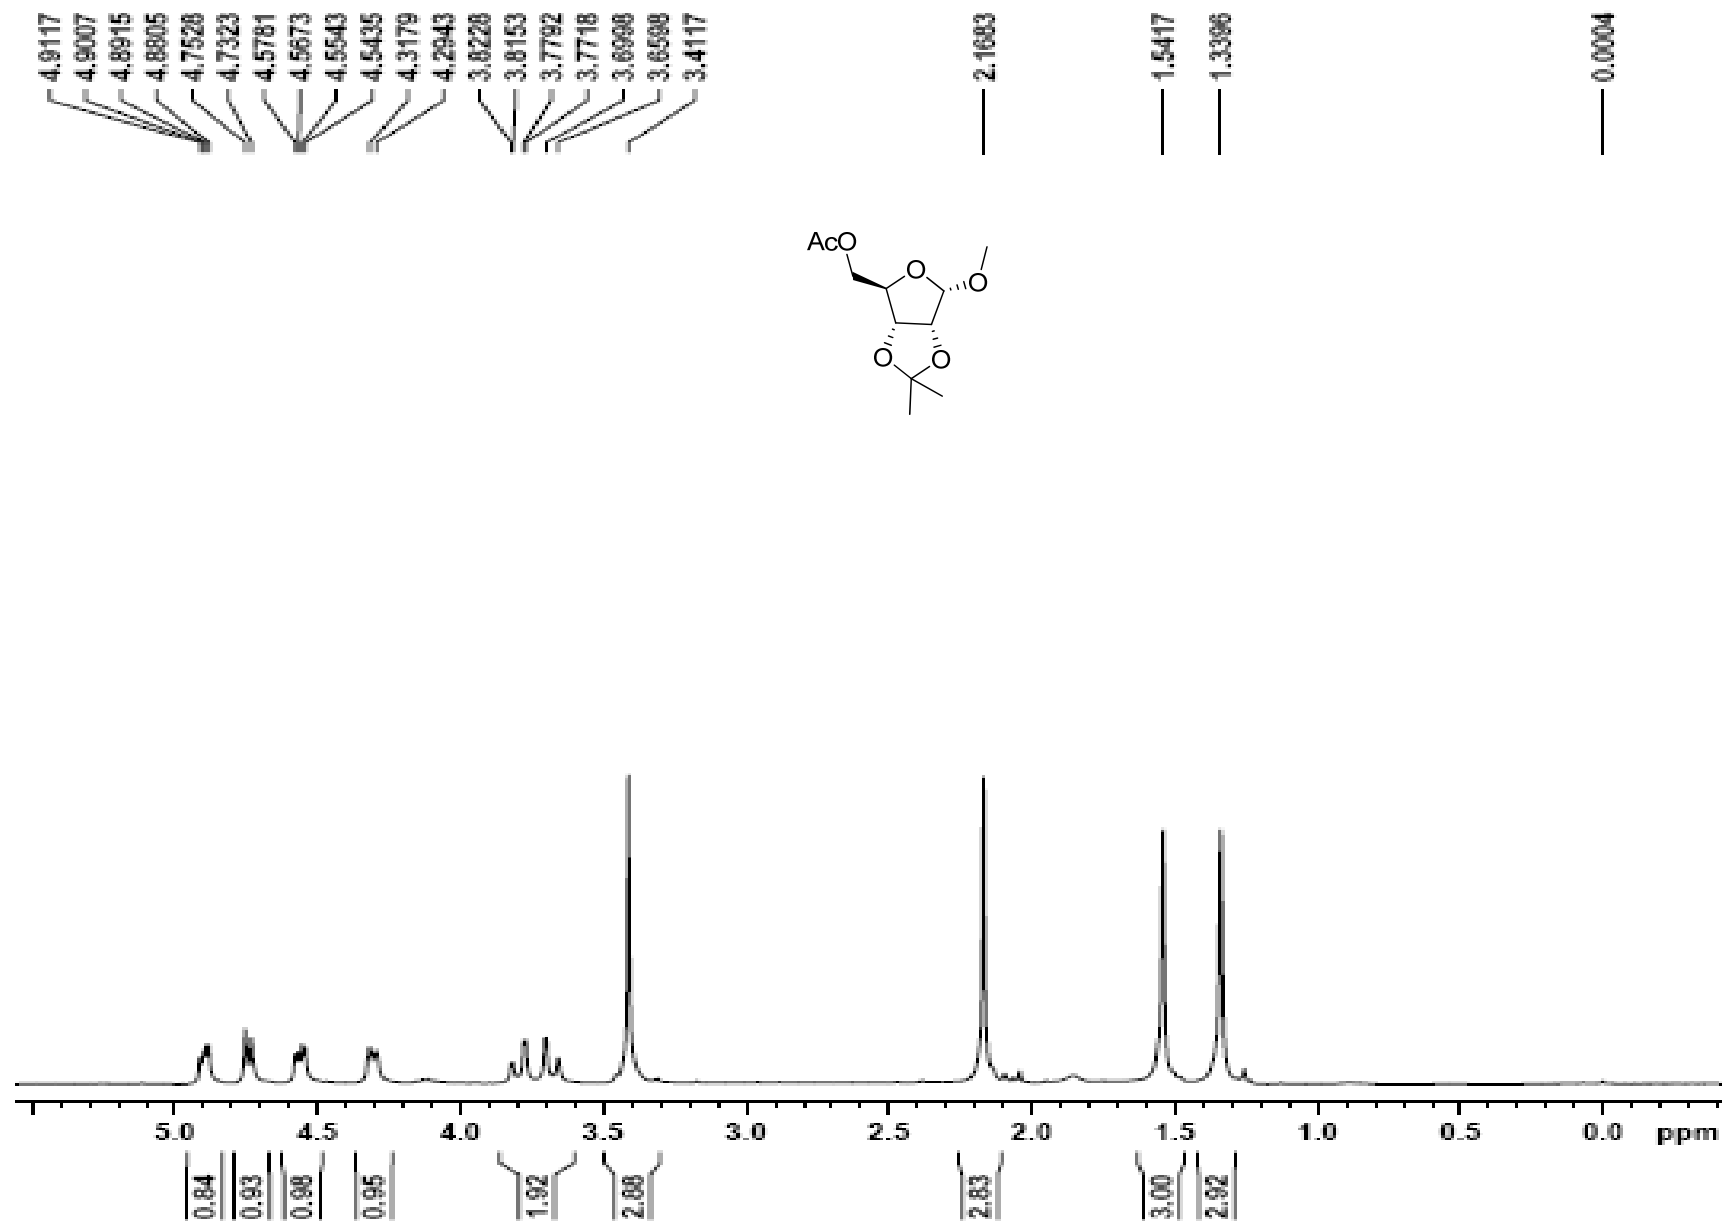

Figure 61 <sup>1</sup>H NMR spectrum of compound 39

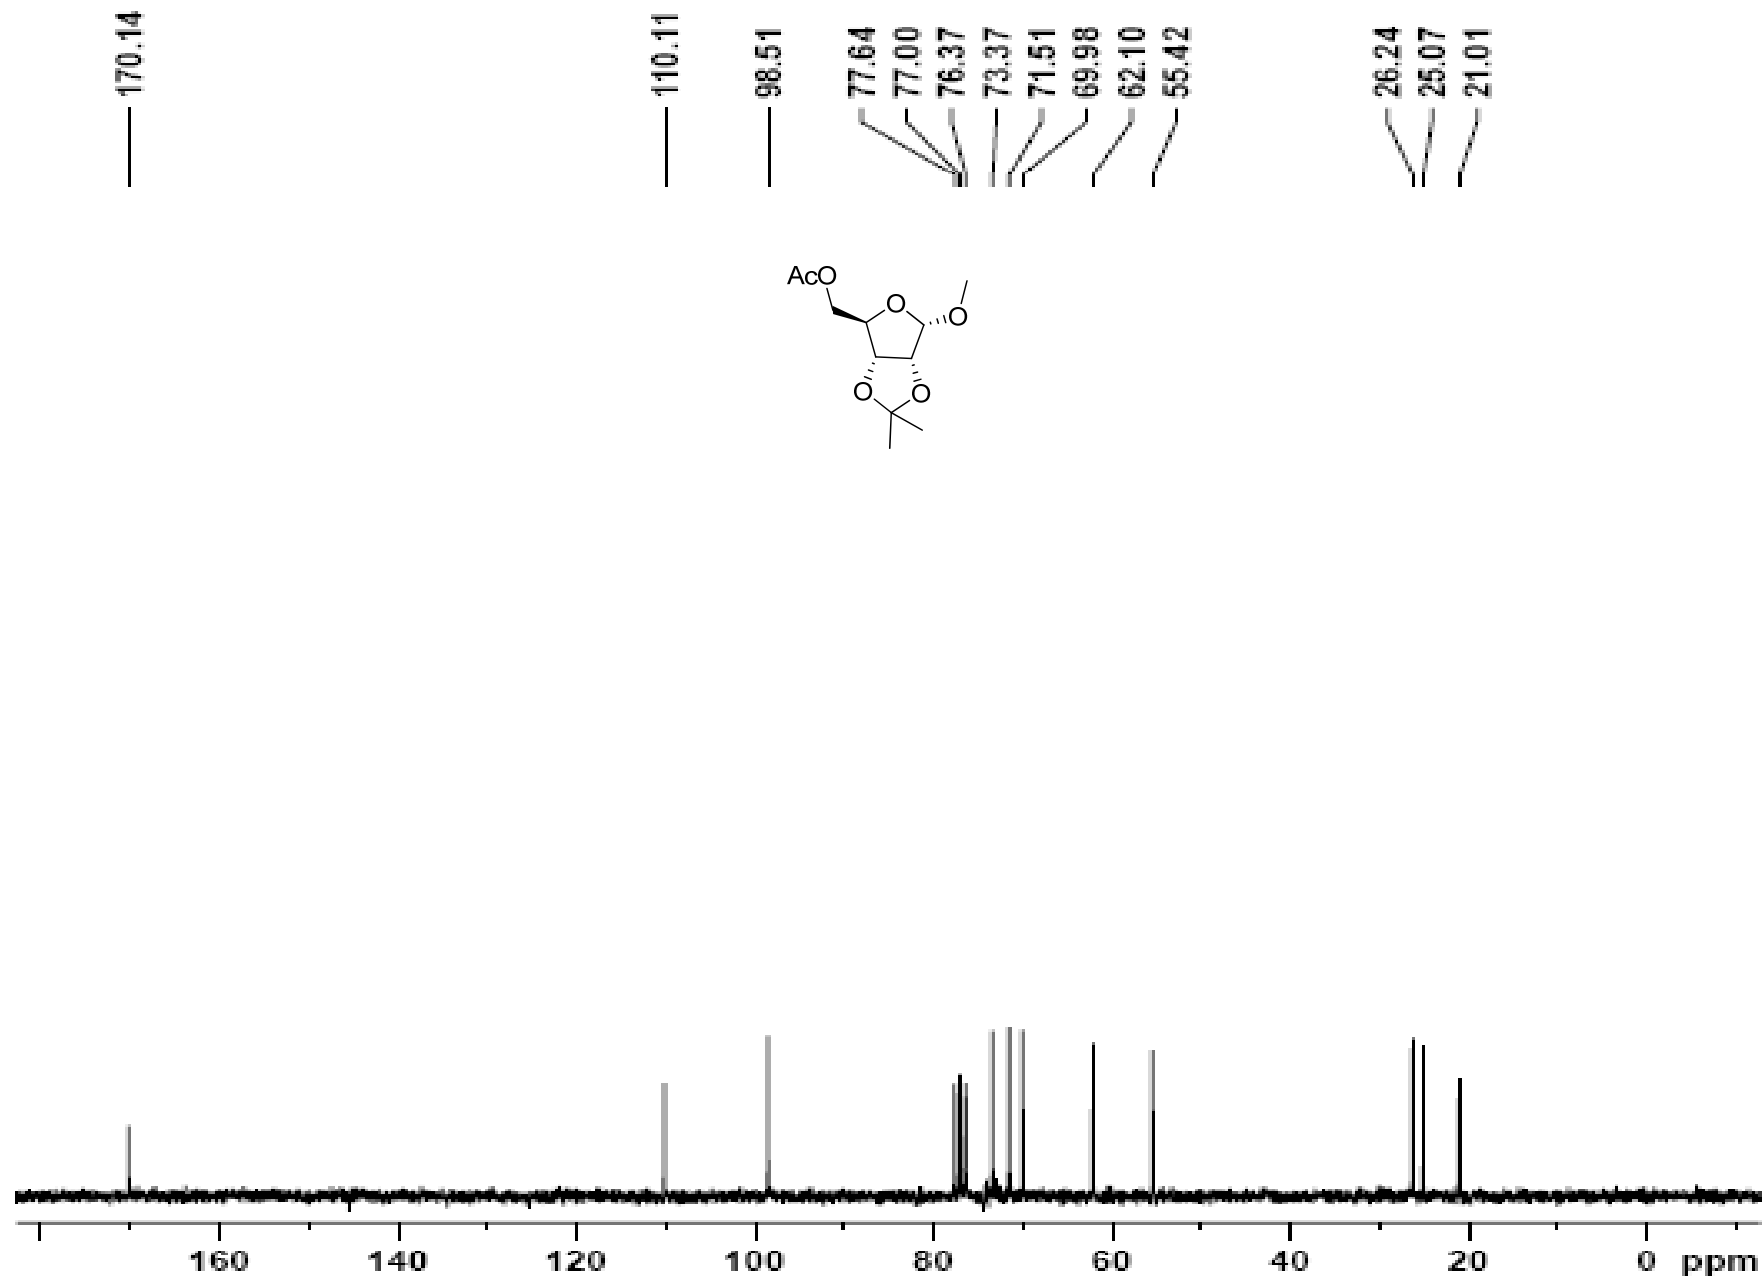

Figure 62  $^{13}\text{C}$  NMR spectrum of compound 39

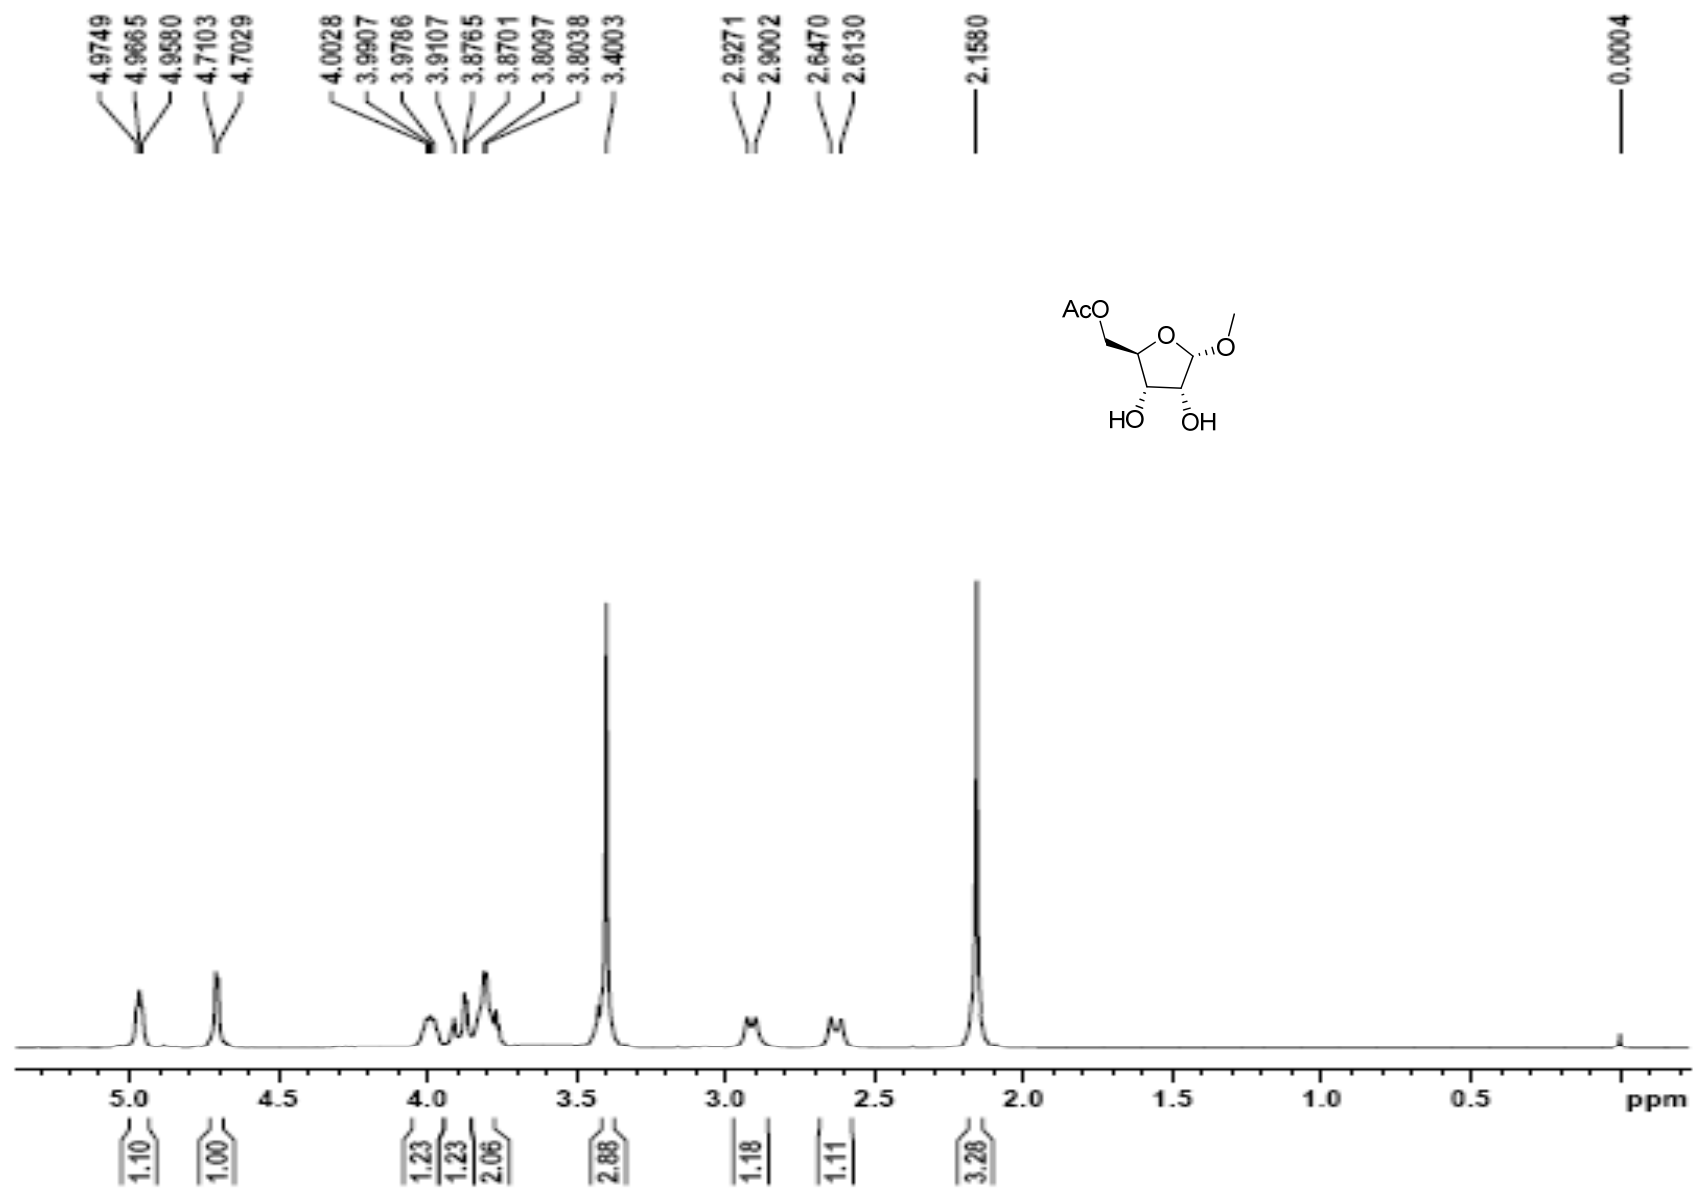

**Figure 63** <sup>1</sup>H NMR spectrum of compound **40**



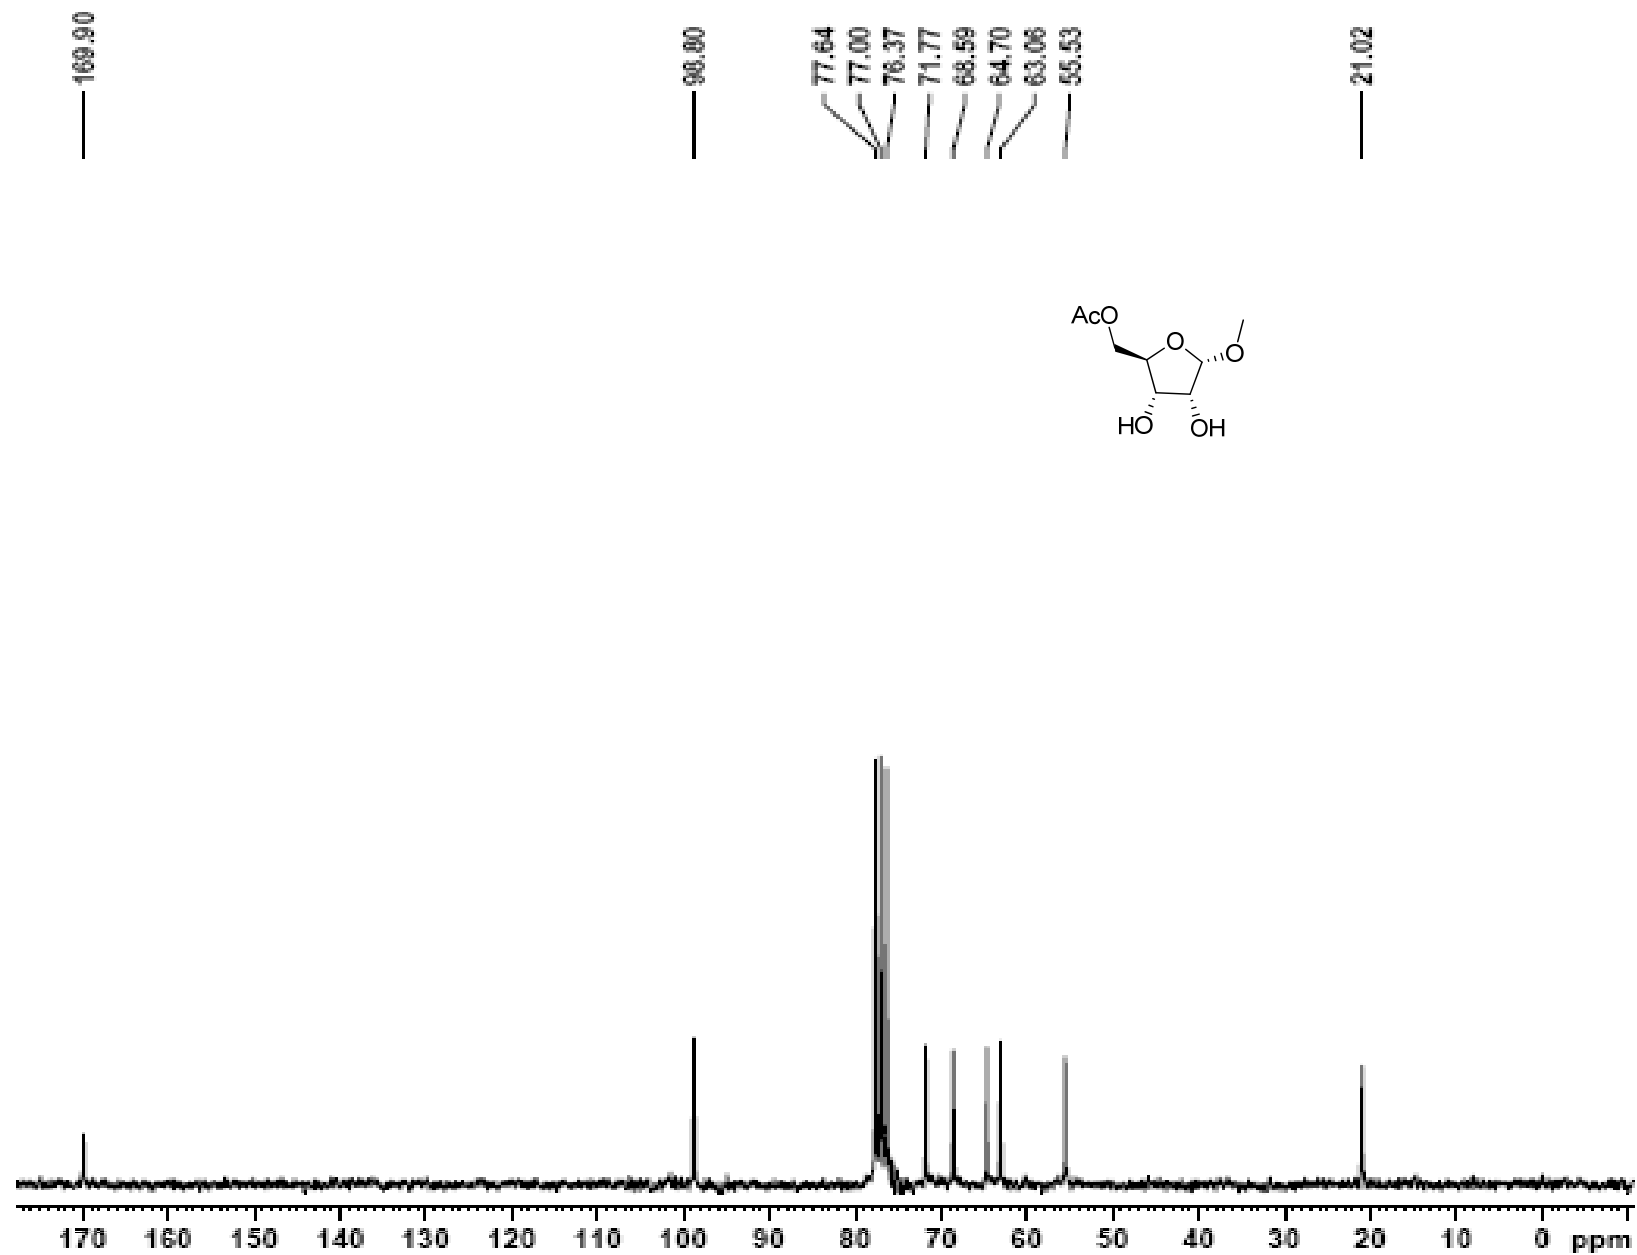

Figure 64  $^{13}\text{C}$  NMR spectrum of compound 40

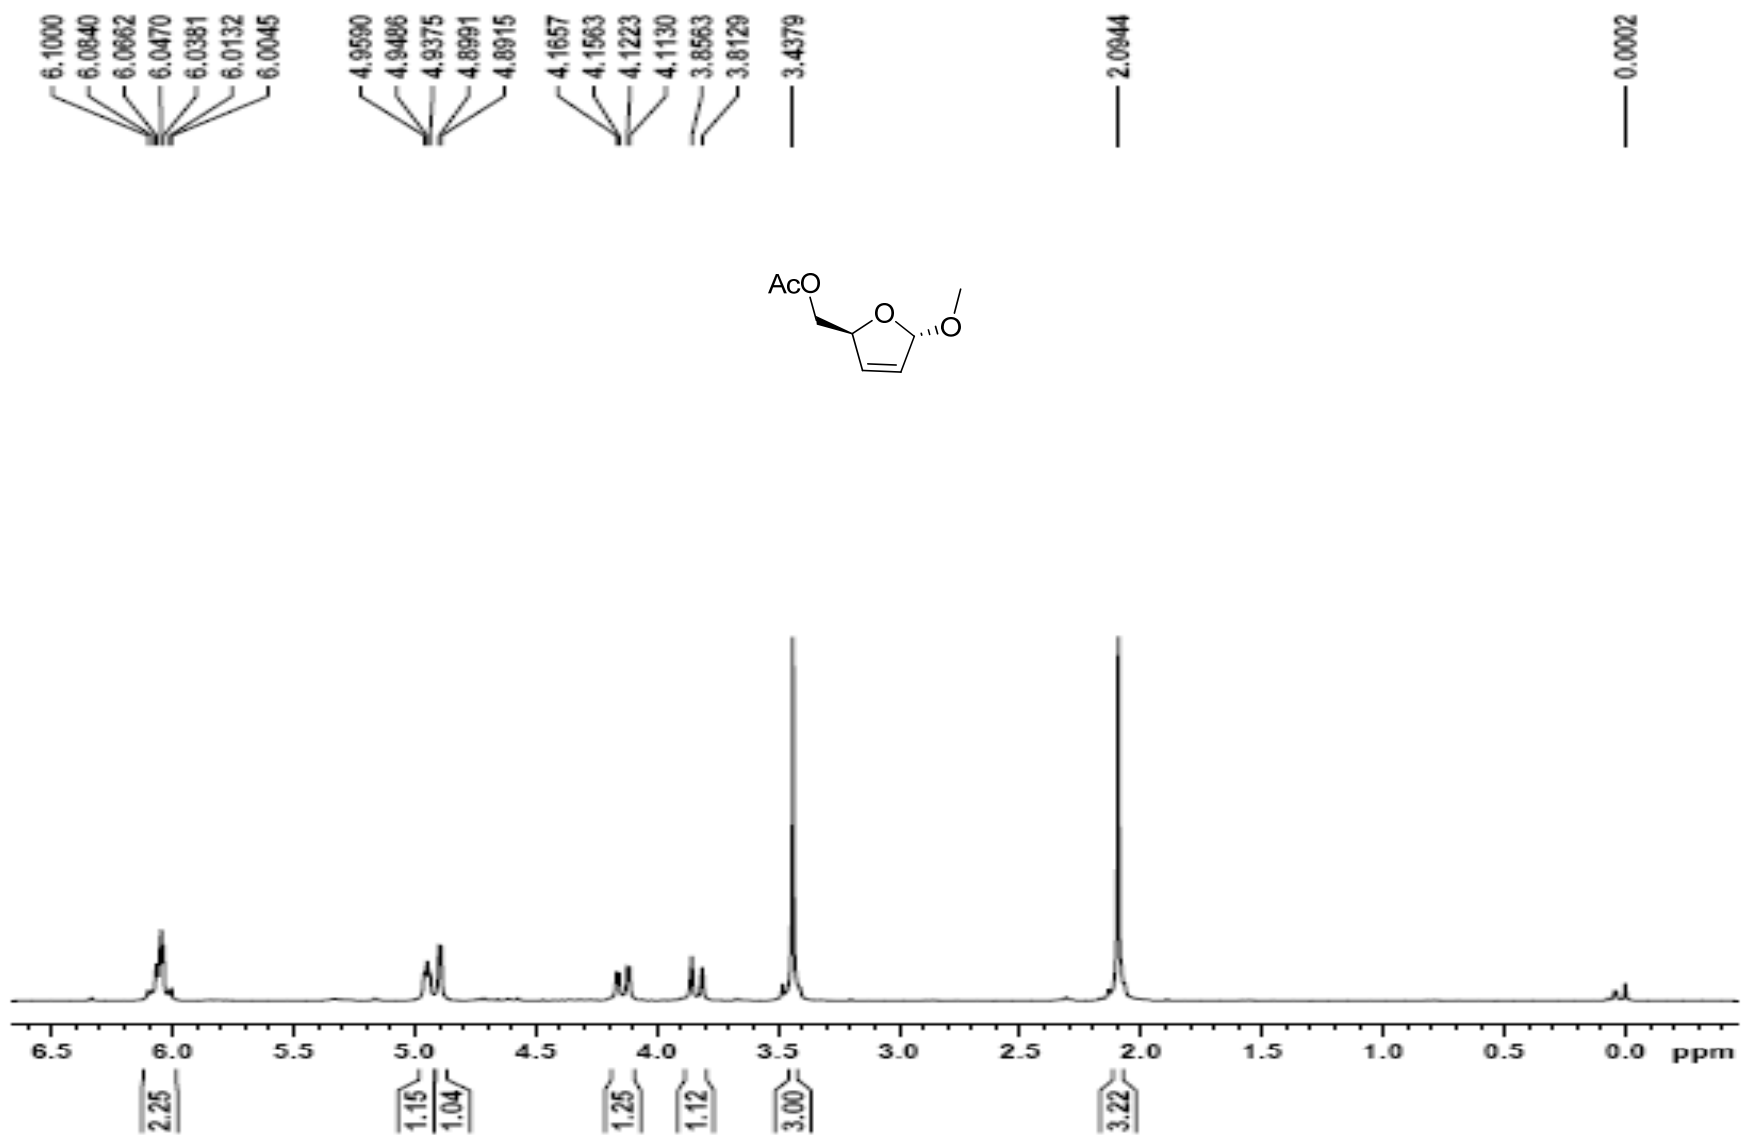

Figure 65 <sup>1</sup>H NMR spectrum of compound 41

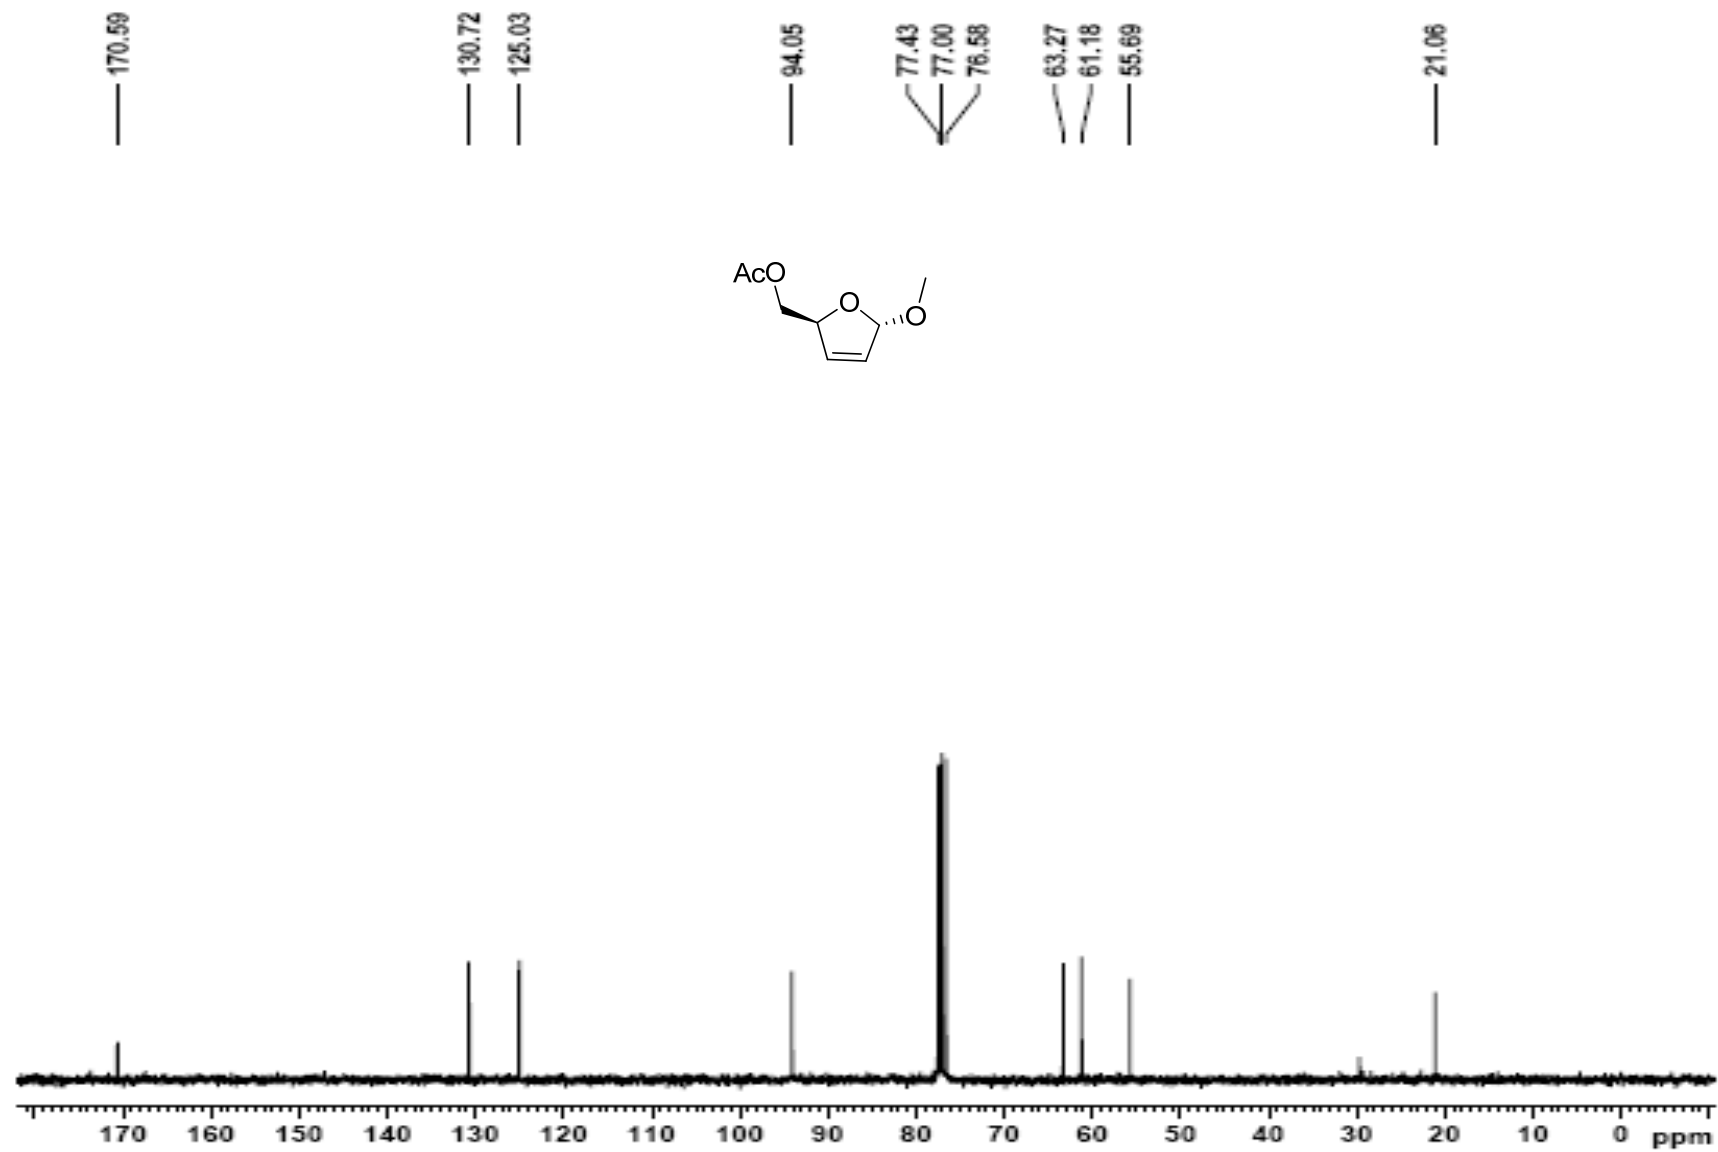

Figure 66 <sup>13</sup>C NMR spectrum of compound 41

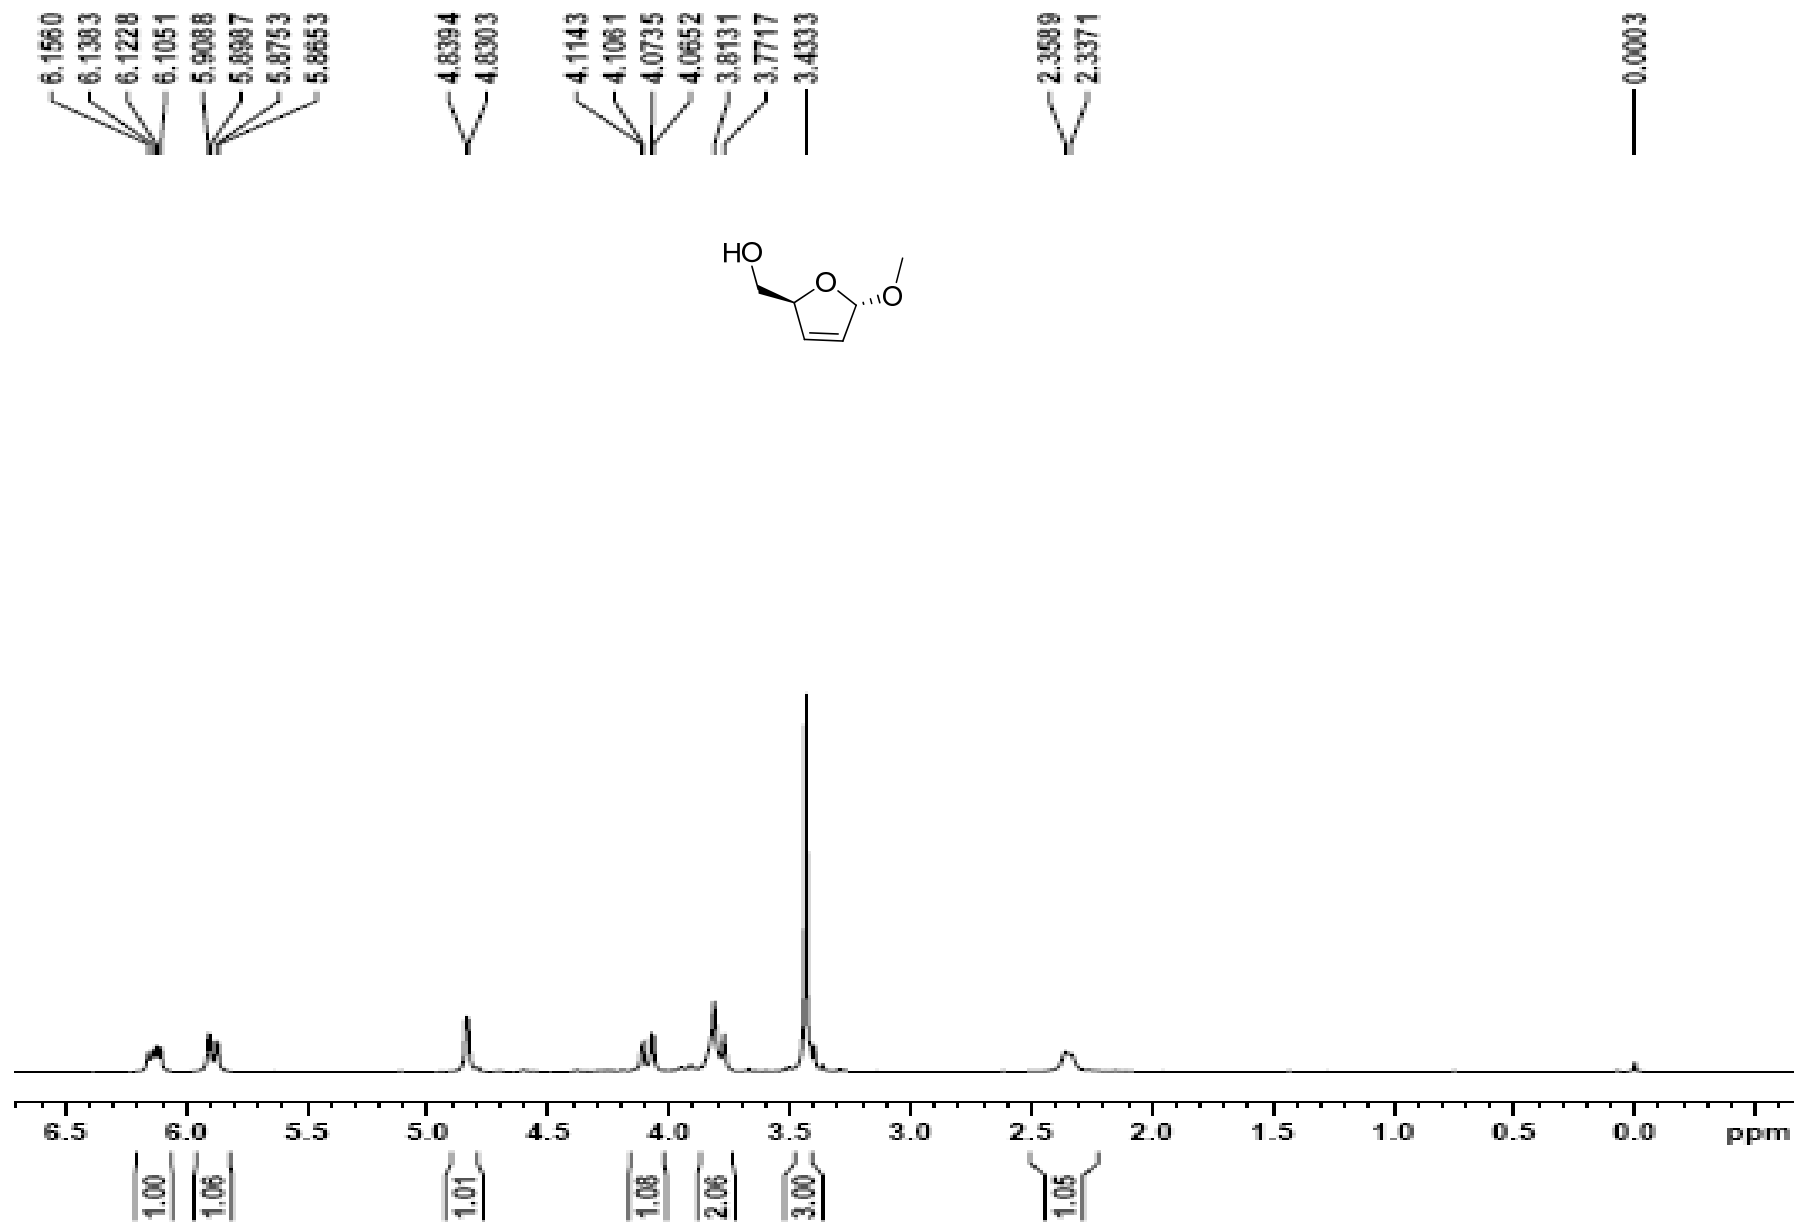

Figure 67 <sup>1</sup>H NMR spectrum of compound 42

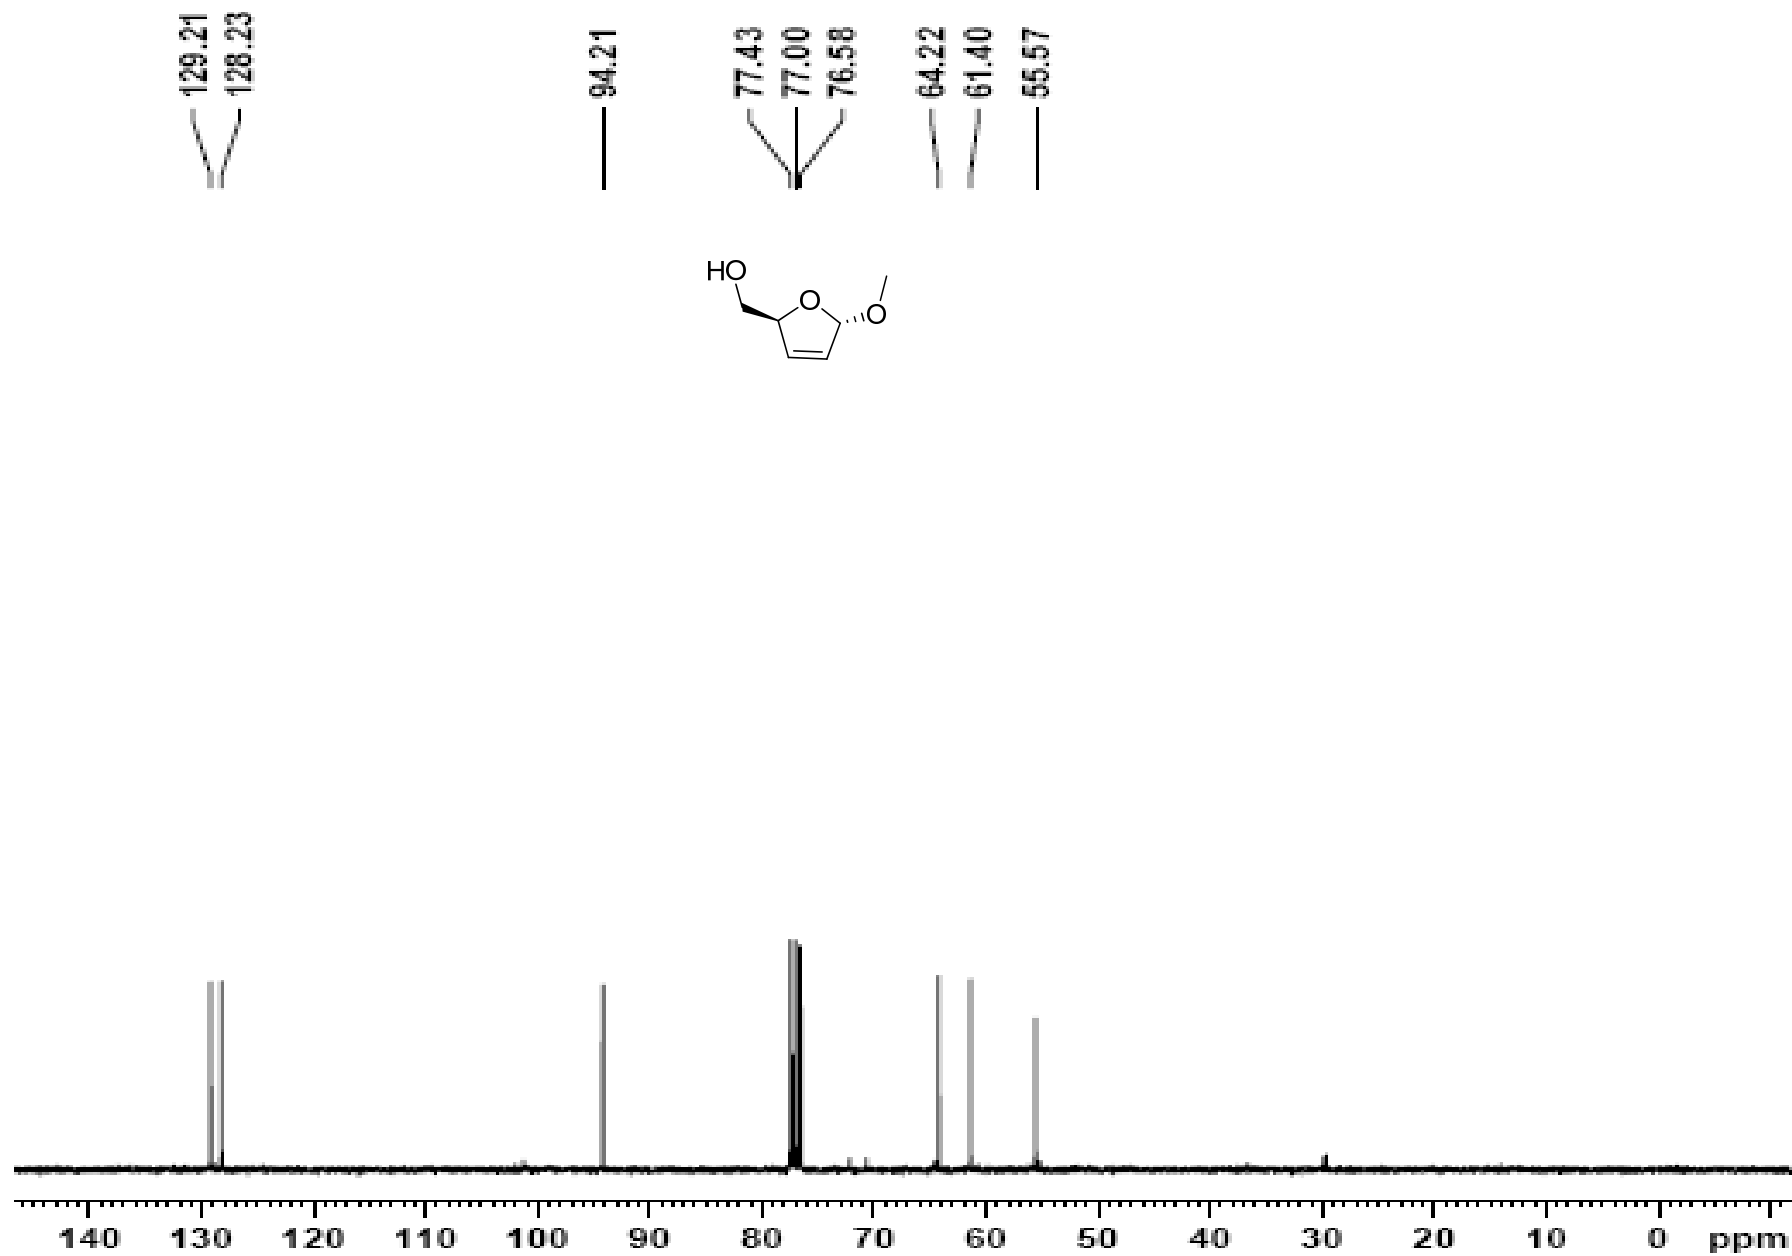

Figure 68 <sup>13</sup>C NMR spectrum of compound 42

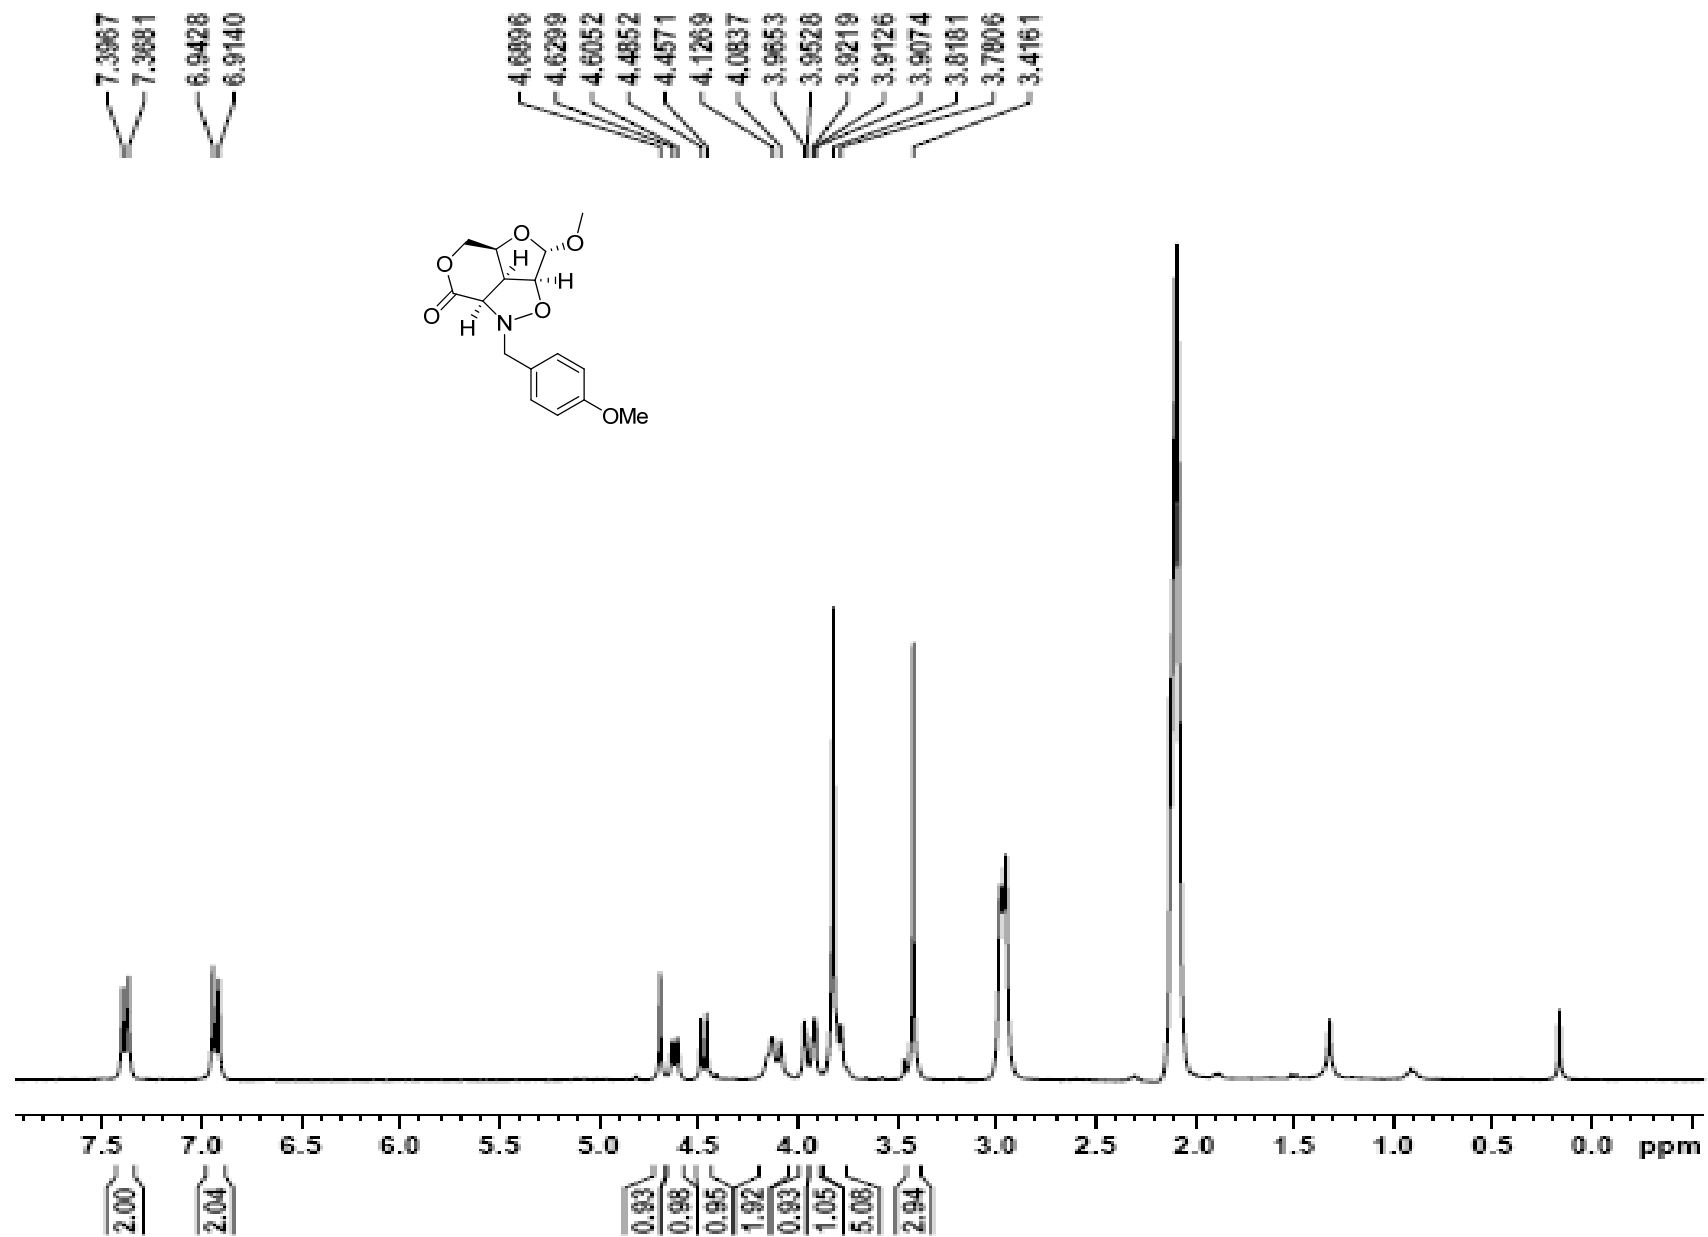

Figure 69 <sup>1</sup>H NMR spectrum of compound 43

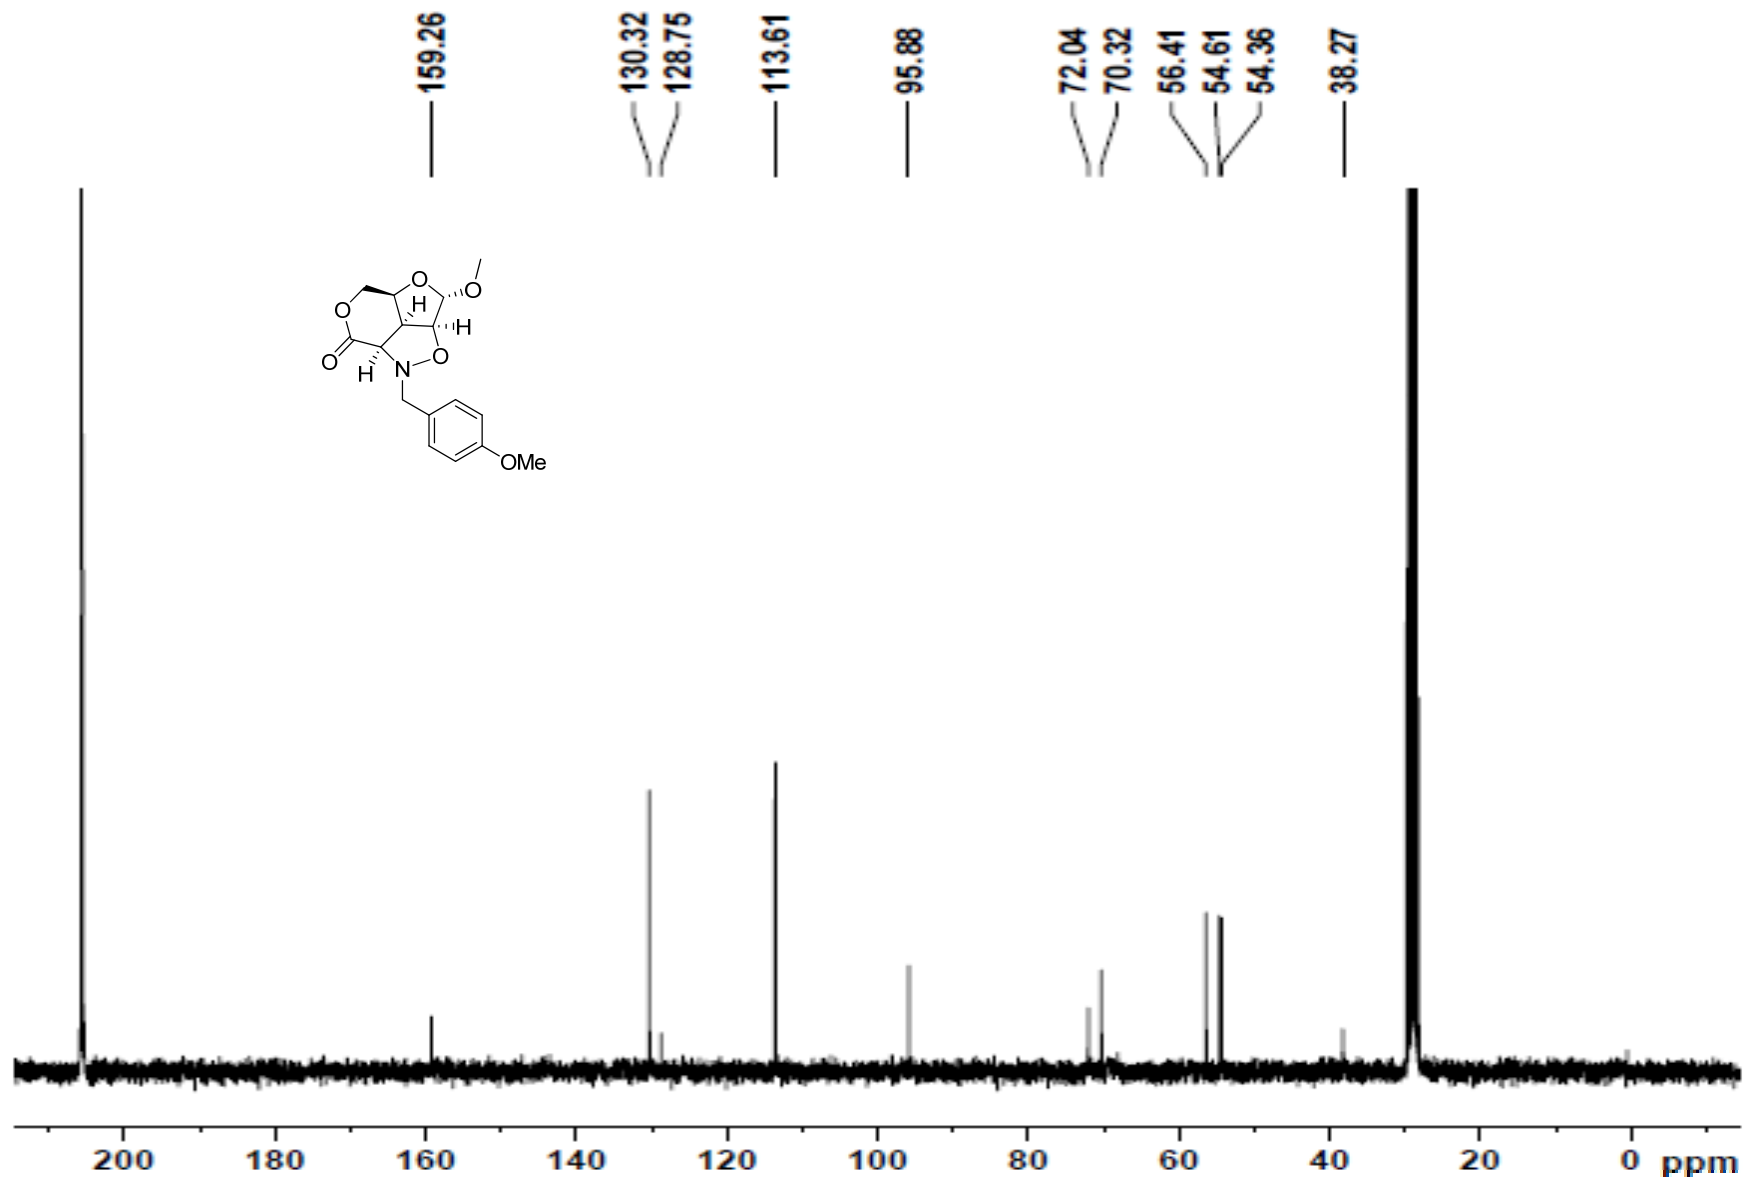

Figure 70 <sup>13</sup>C NMR spectrum of compound 43

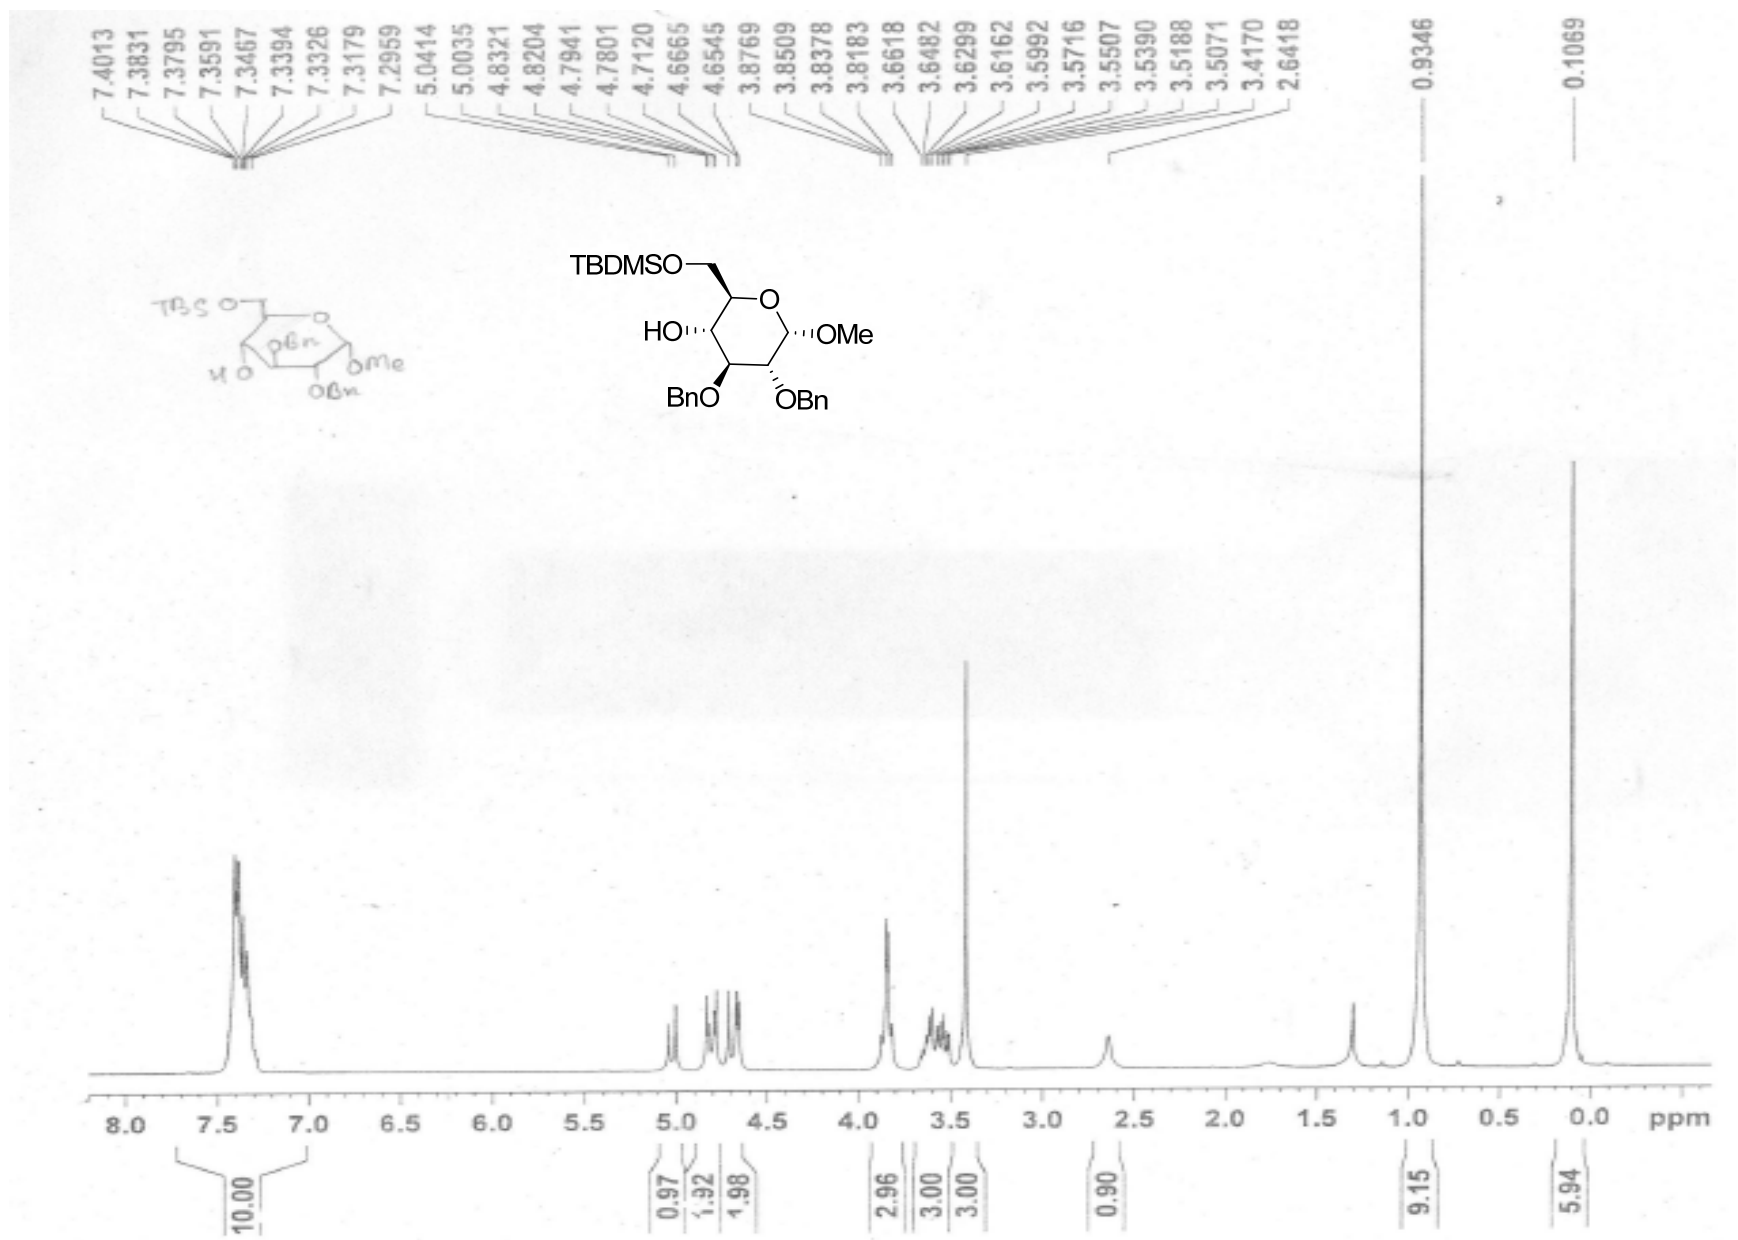

Figure 71 <sup>1</sup>H NMR spectrum of compound 48



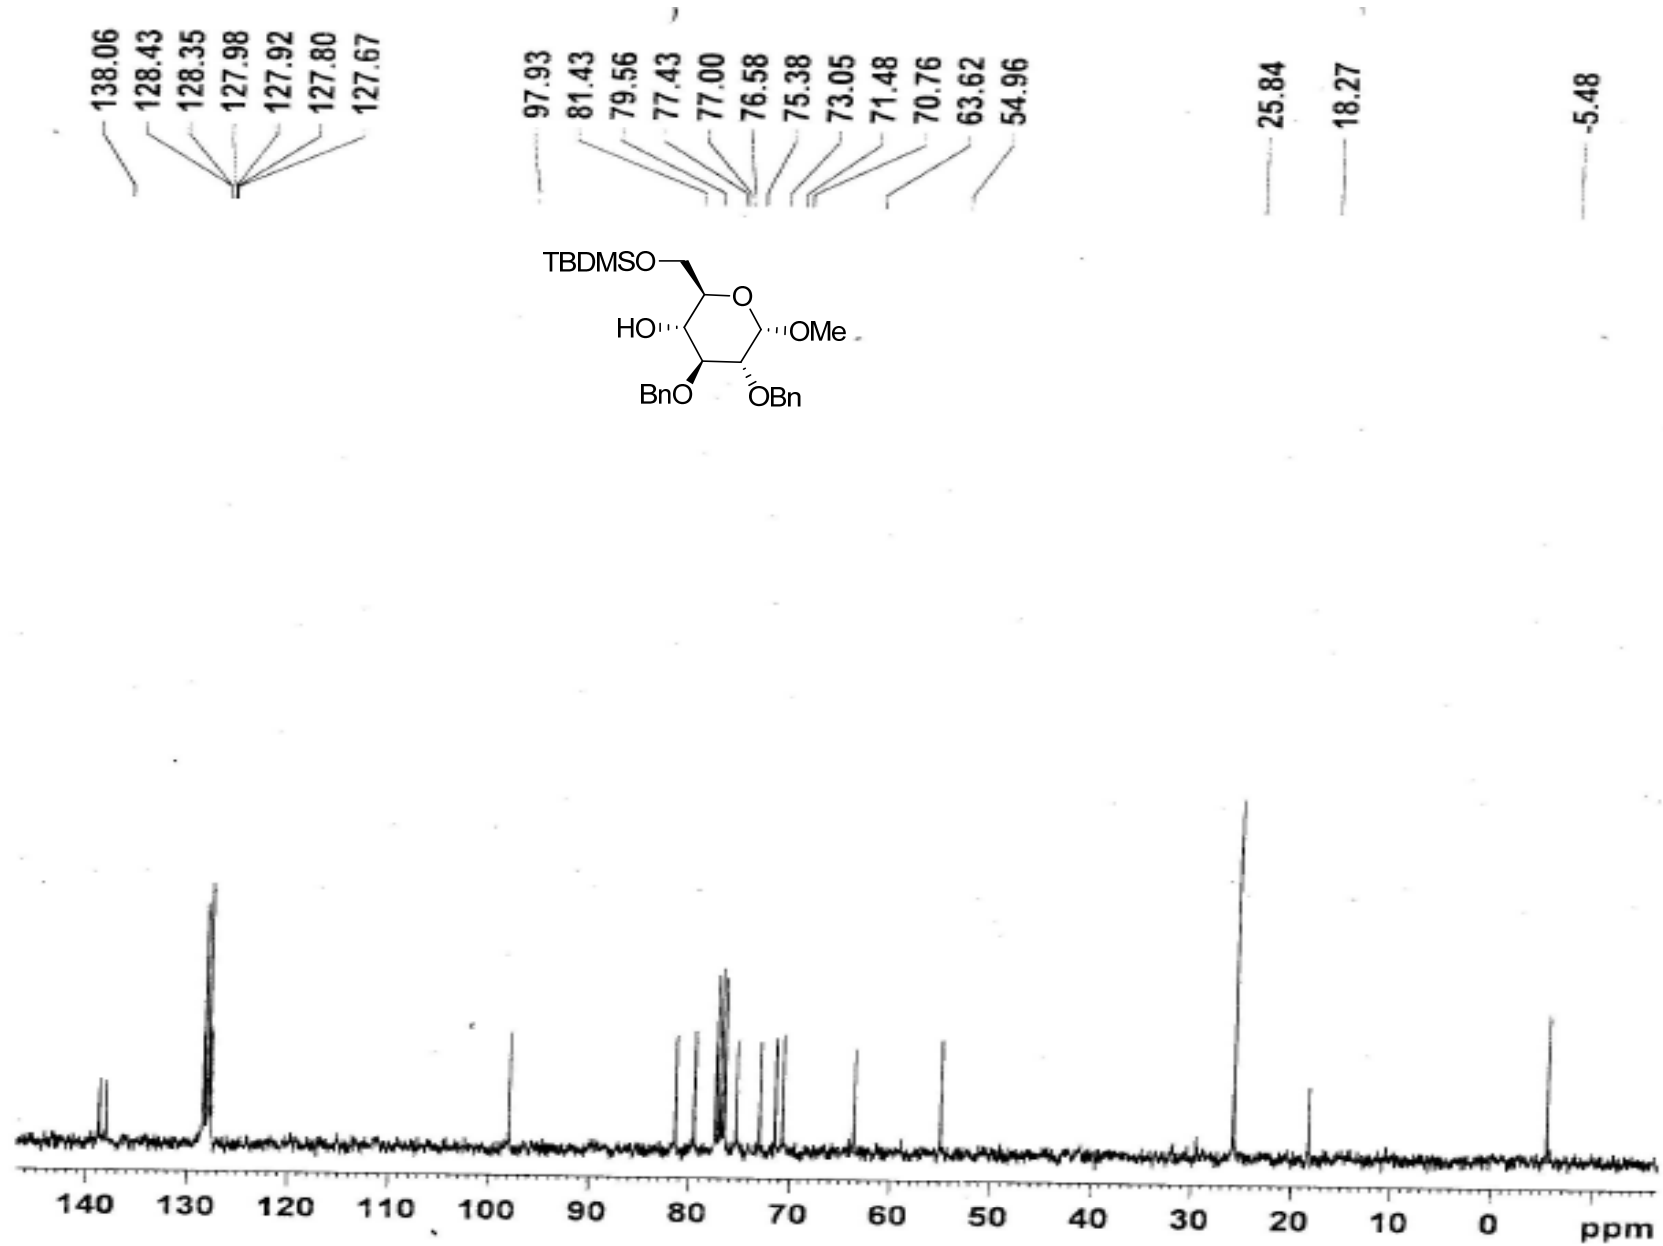

Figure 72  $^{13}\text{C}$  NMR spectrum of compound 48

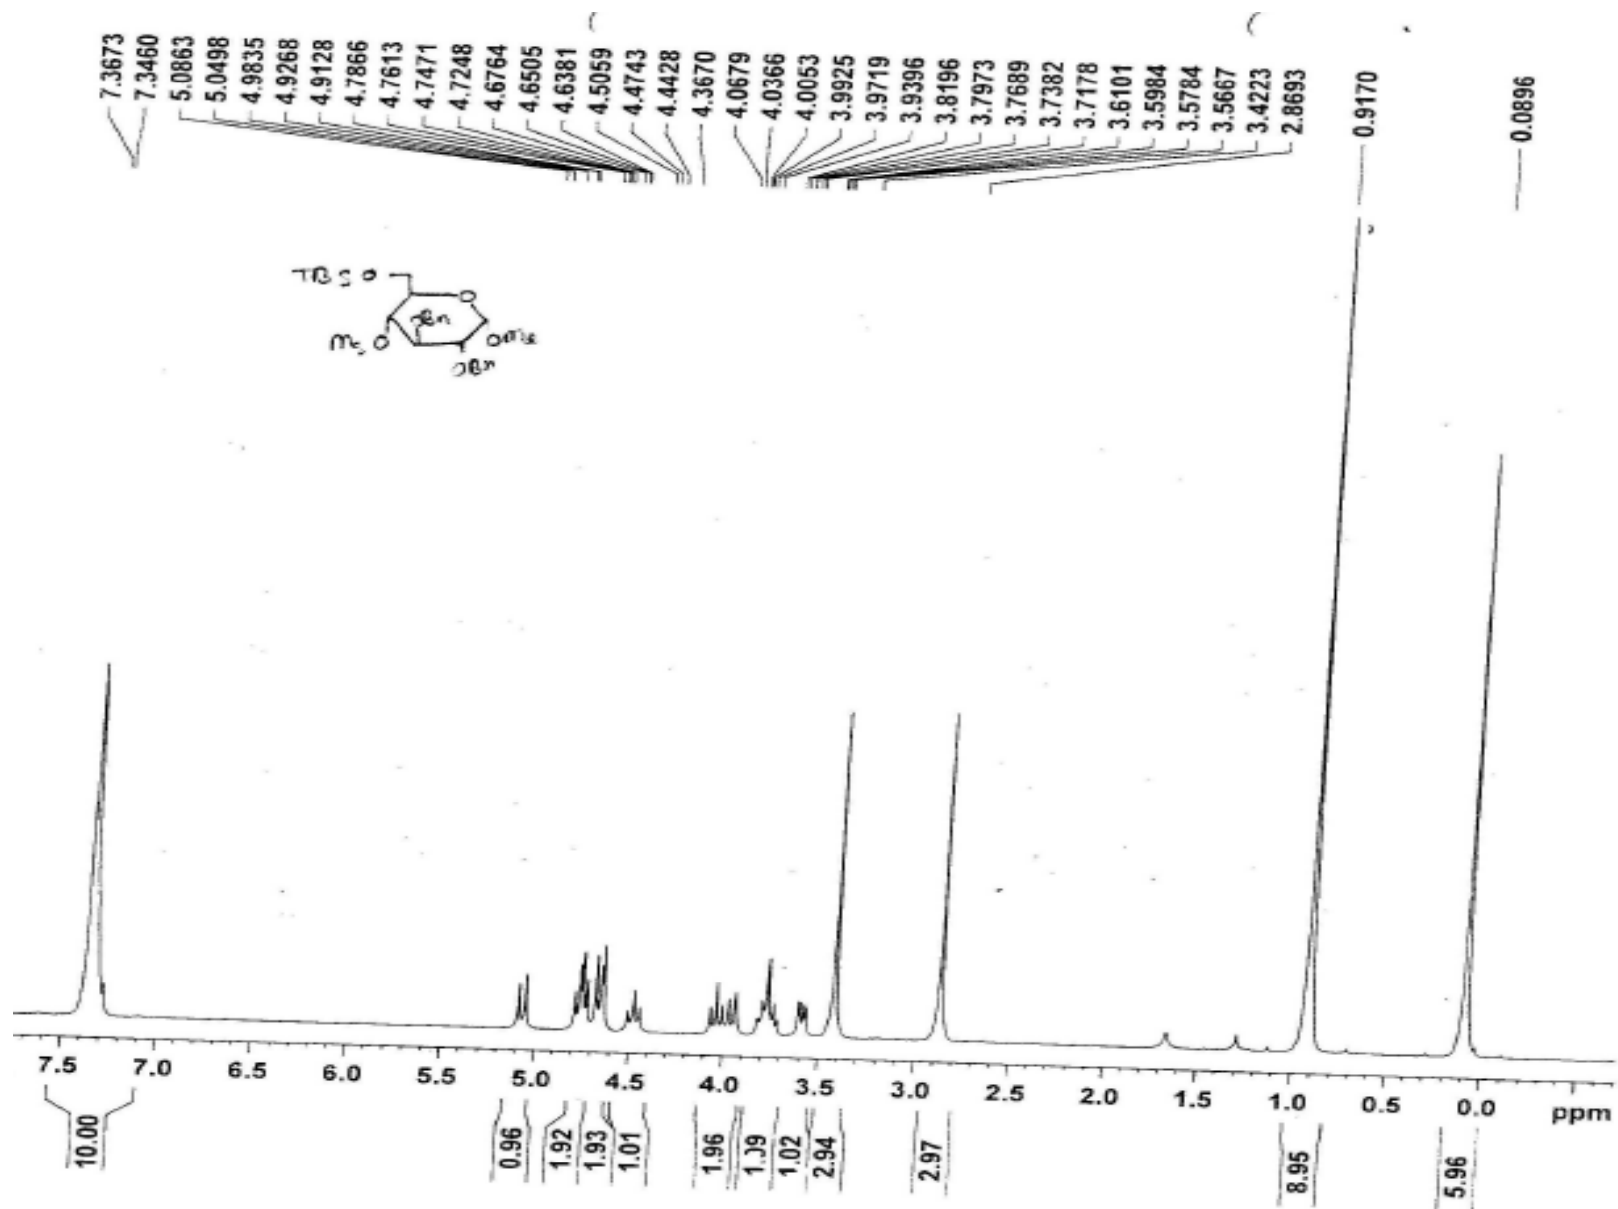

Figure 73 <sup>1</sup>H NMR spectrum of compound 49

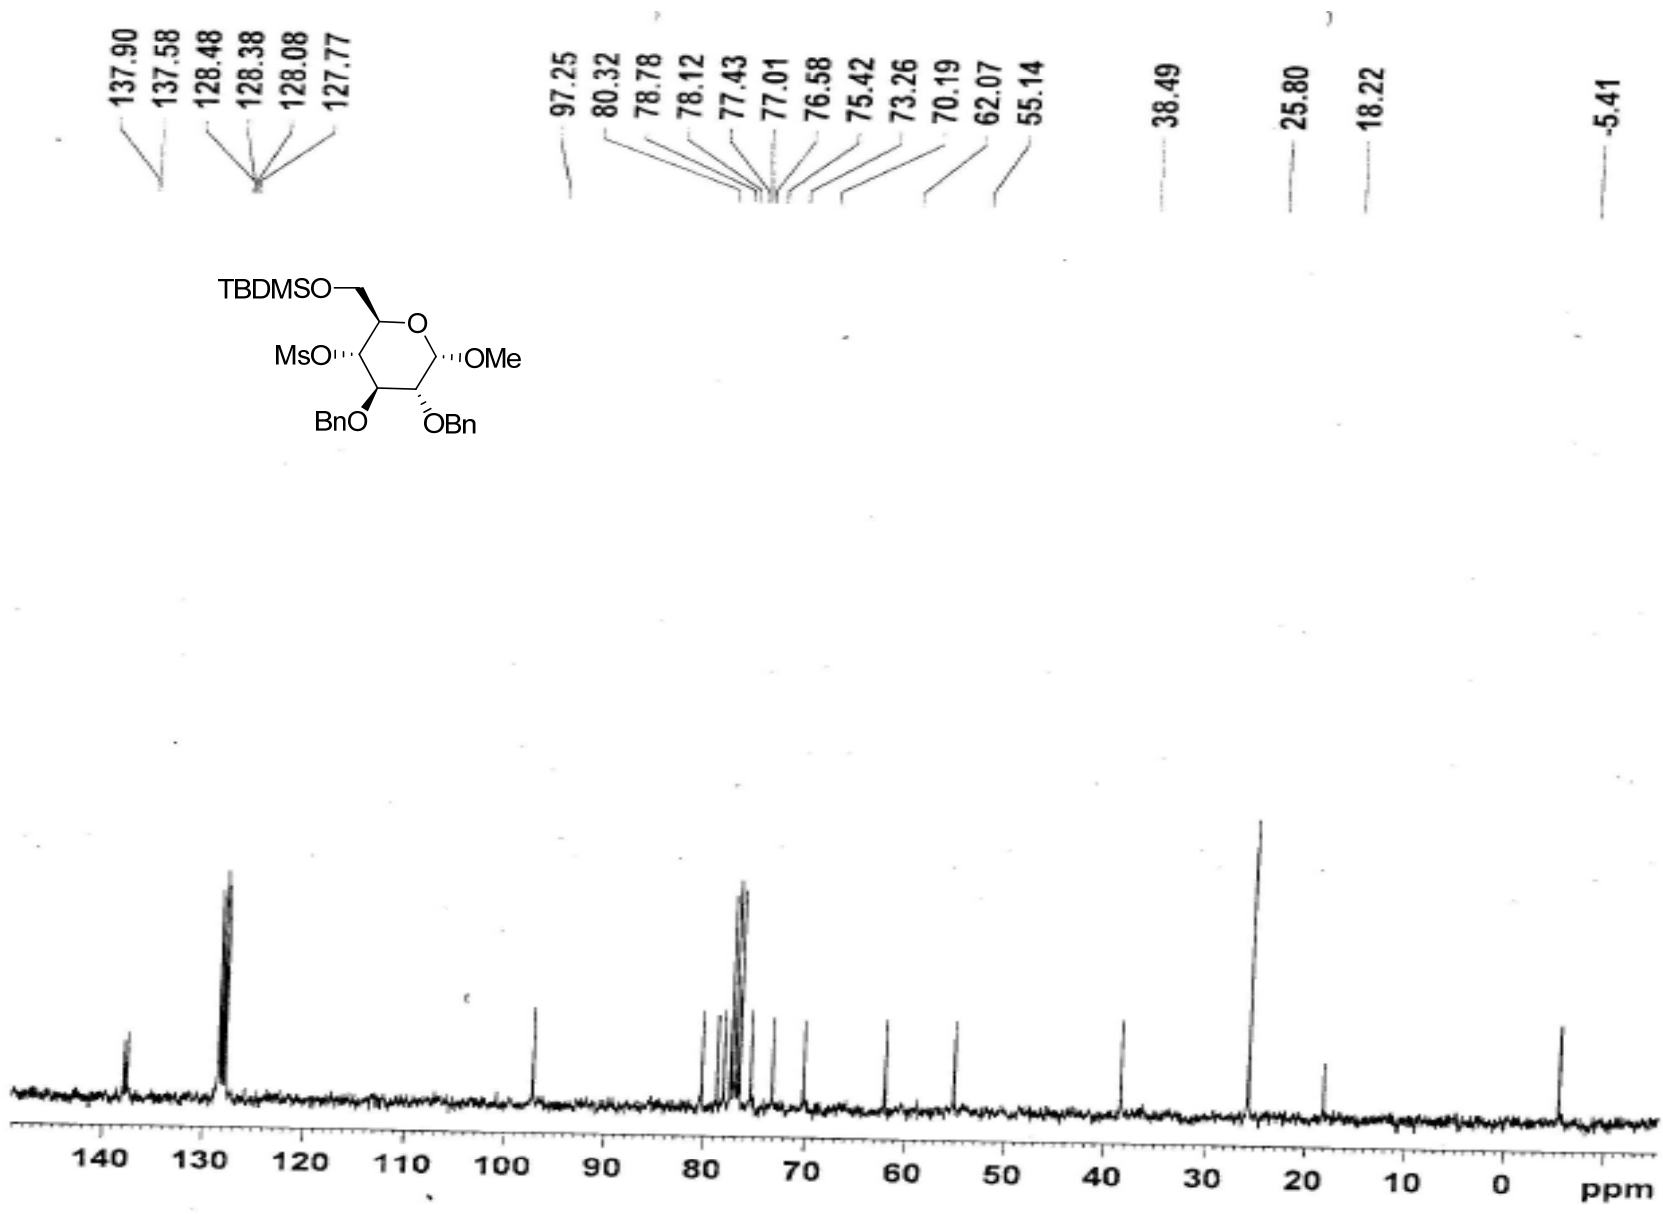

Figure 74 <sup>13</sup>C NMR spectrum of compound 49

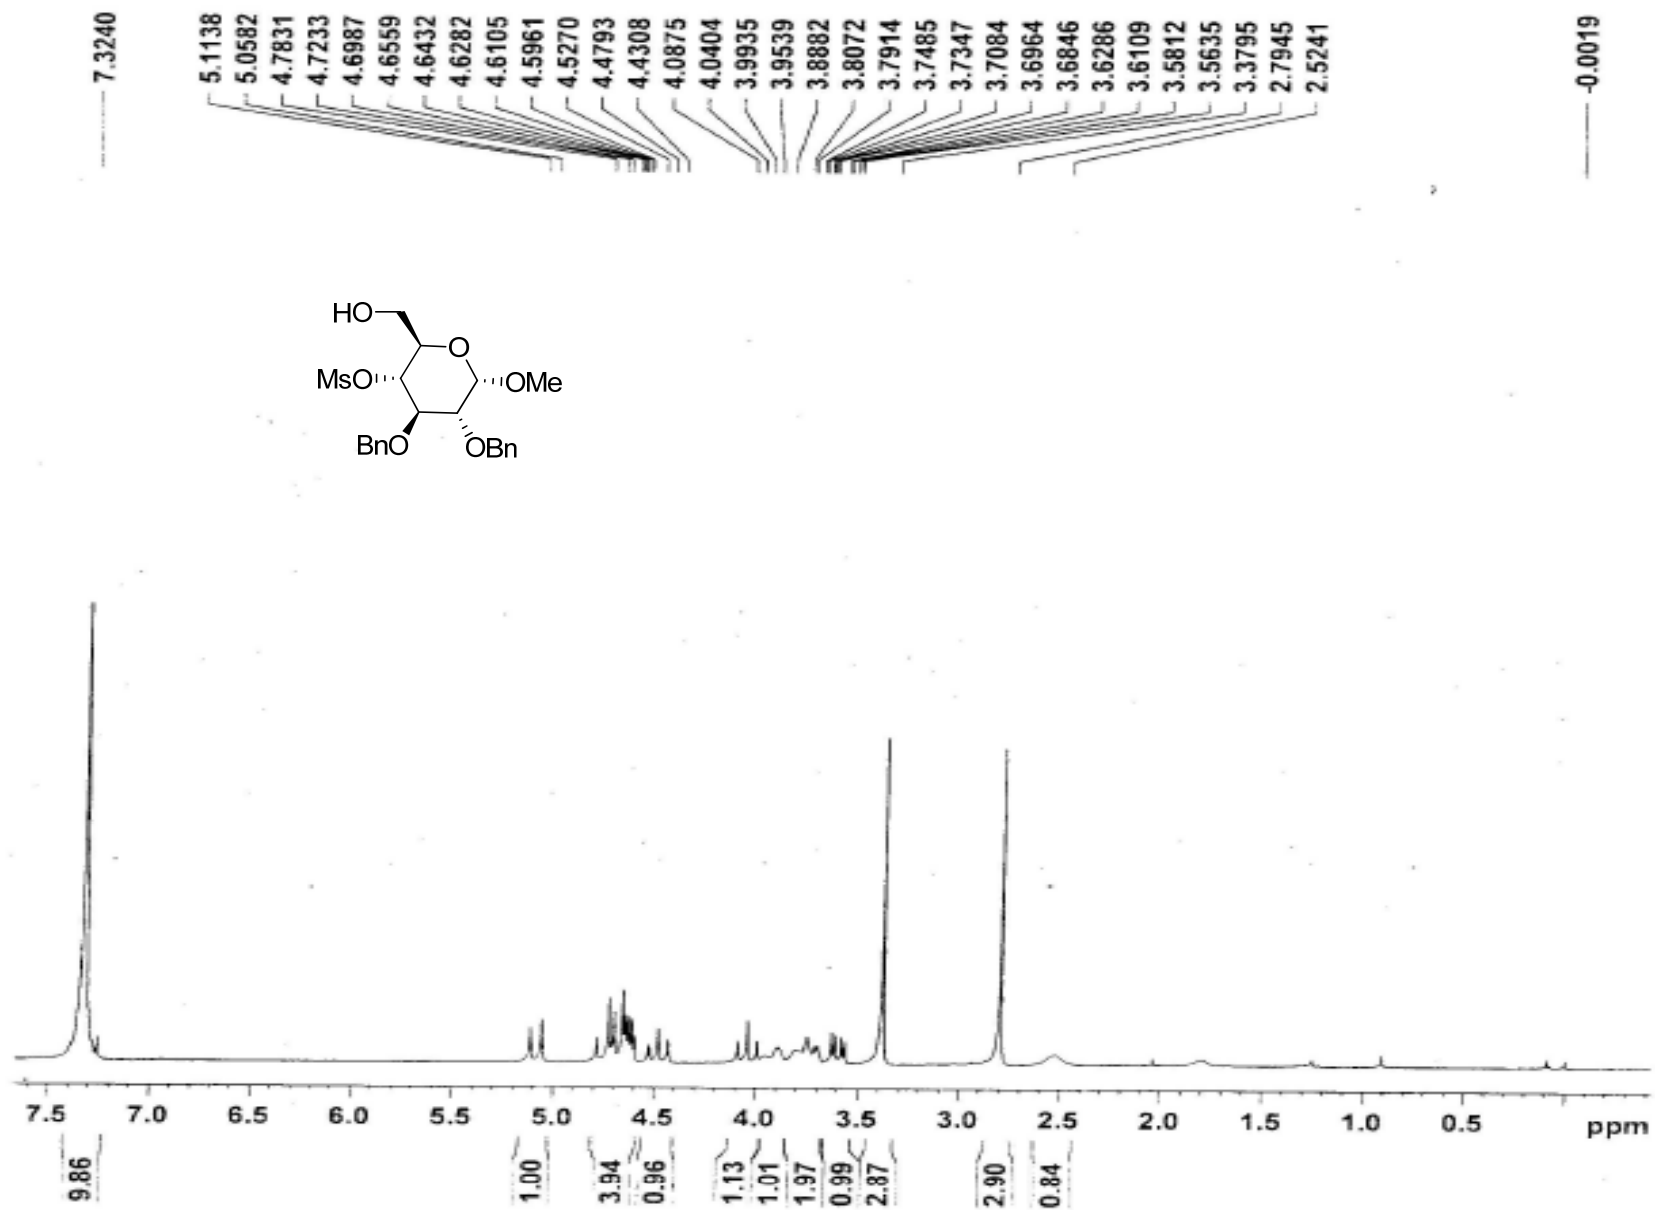

Figure 75 <sup>1</sup>H NMR spectrum of compound 50

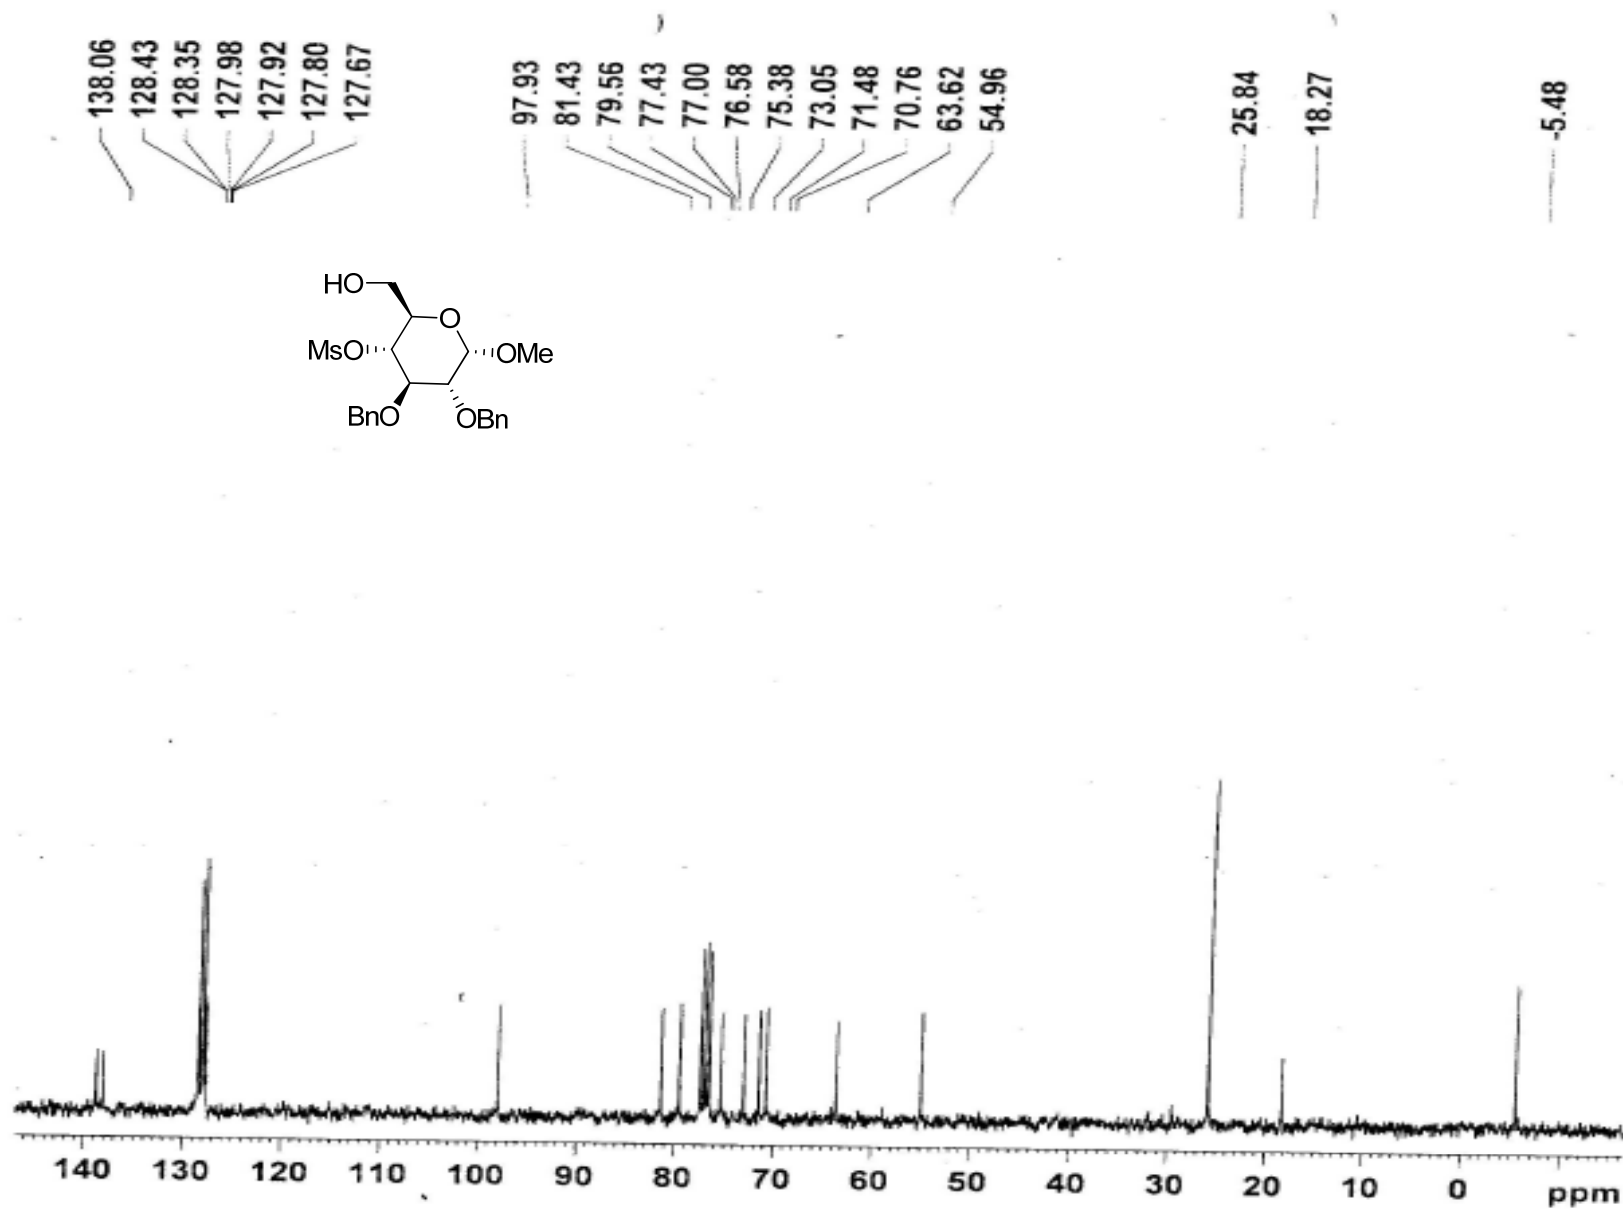

Figure 76 <sup>13</sup>C NMR spectrum of compound 50

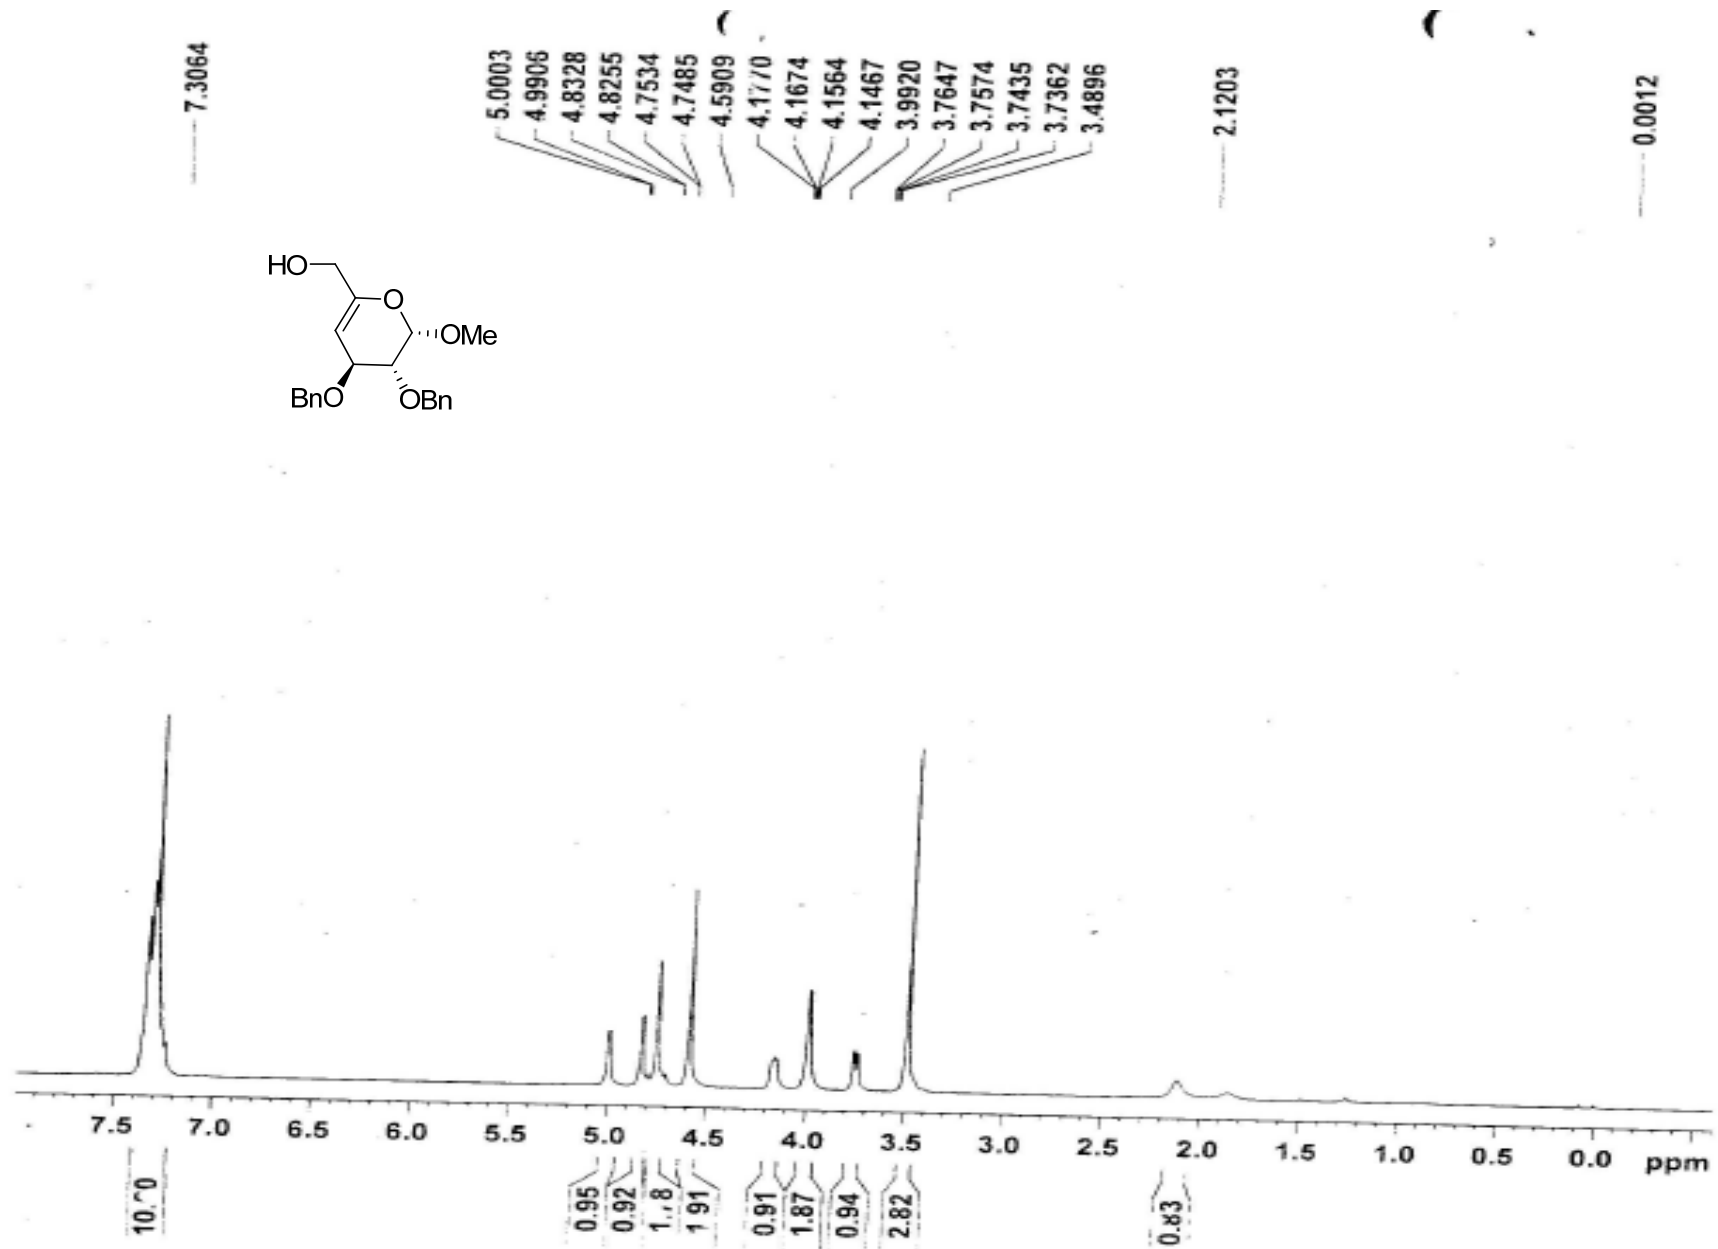

Figure 77 <sup>1</sup>H NMR spectrum of compound 52

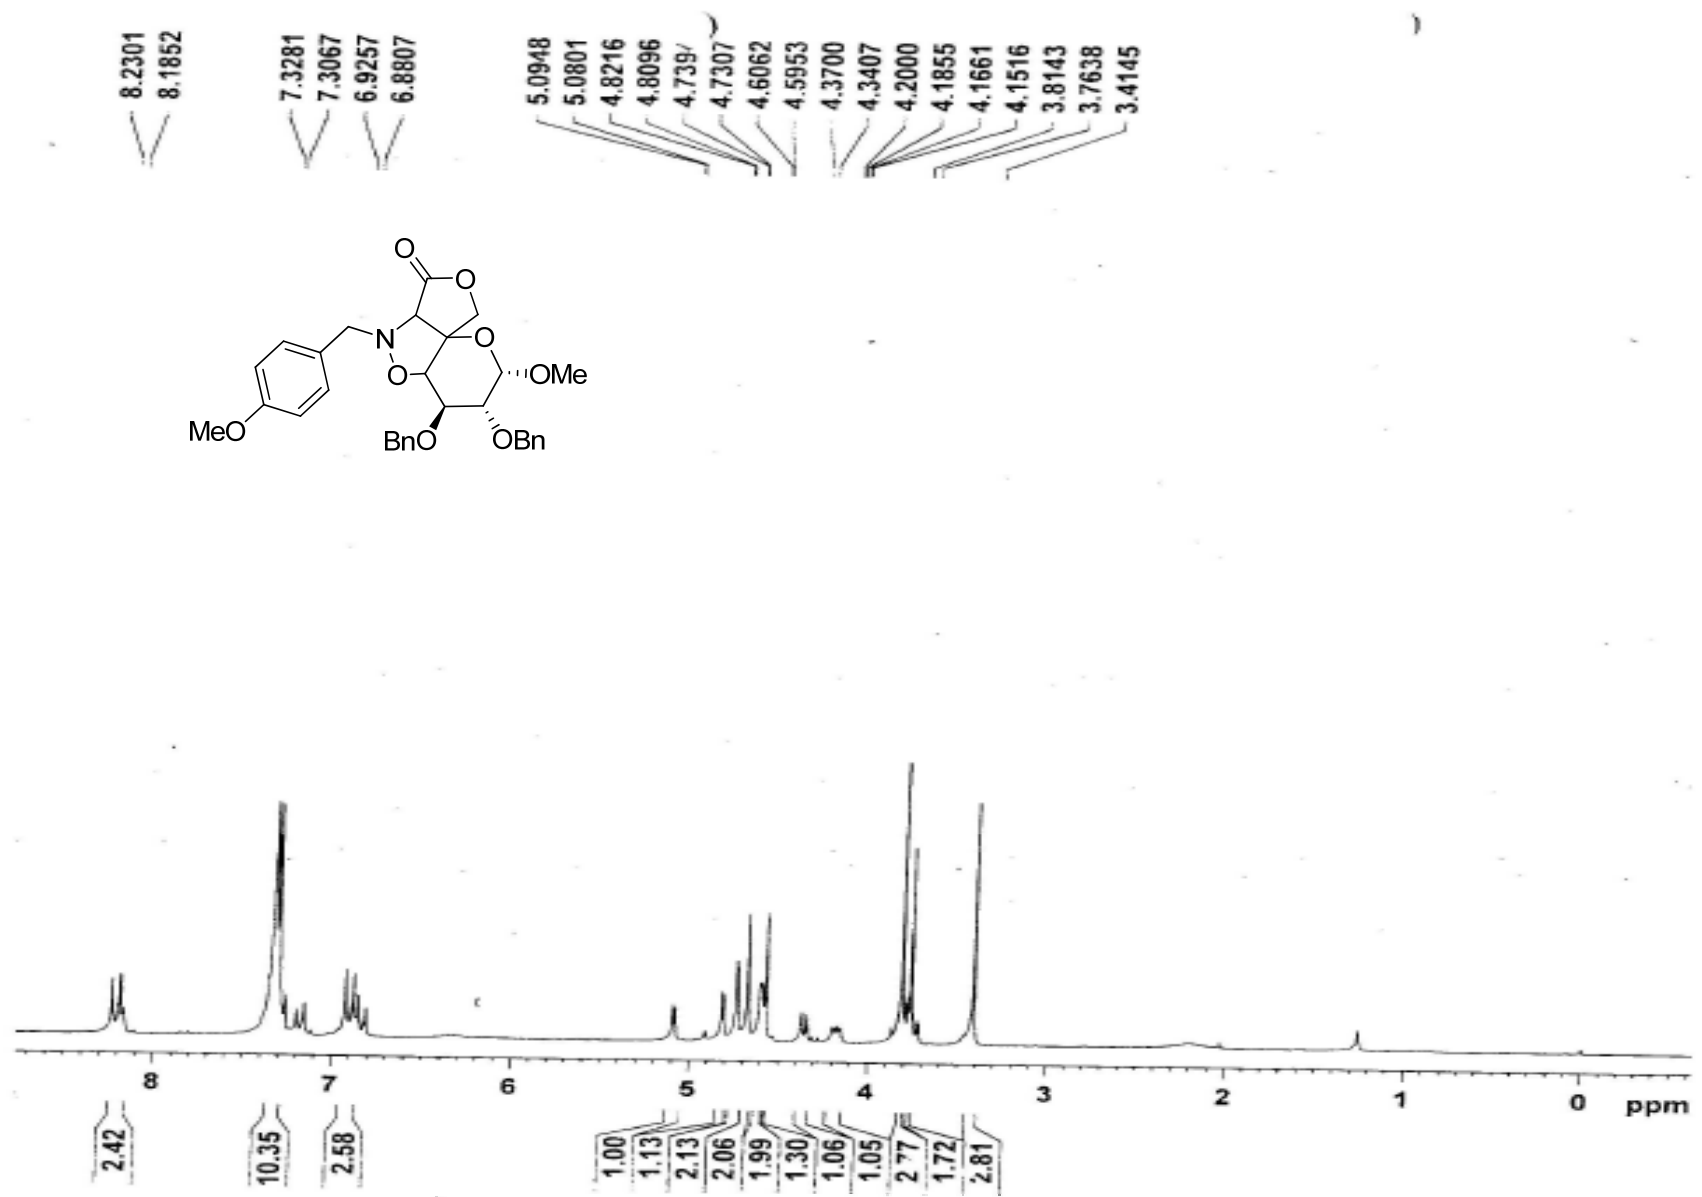

Figure 78 <sup>1</sup>H NMR spectrum of compound 53

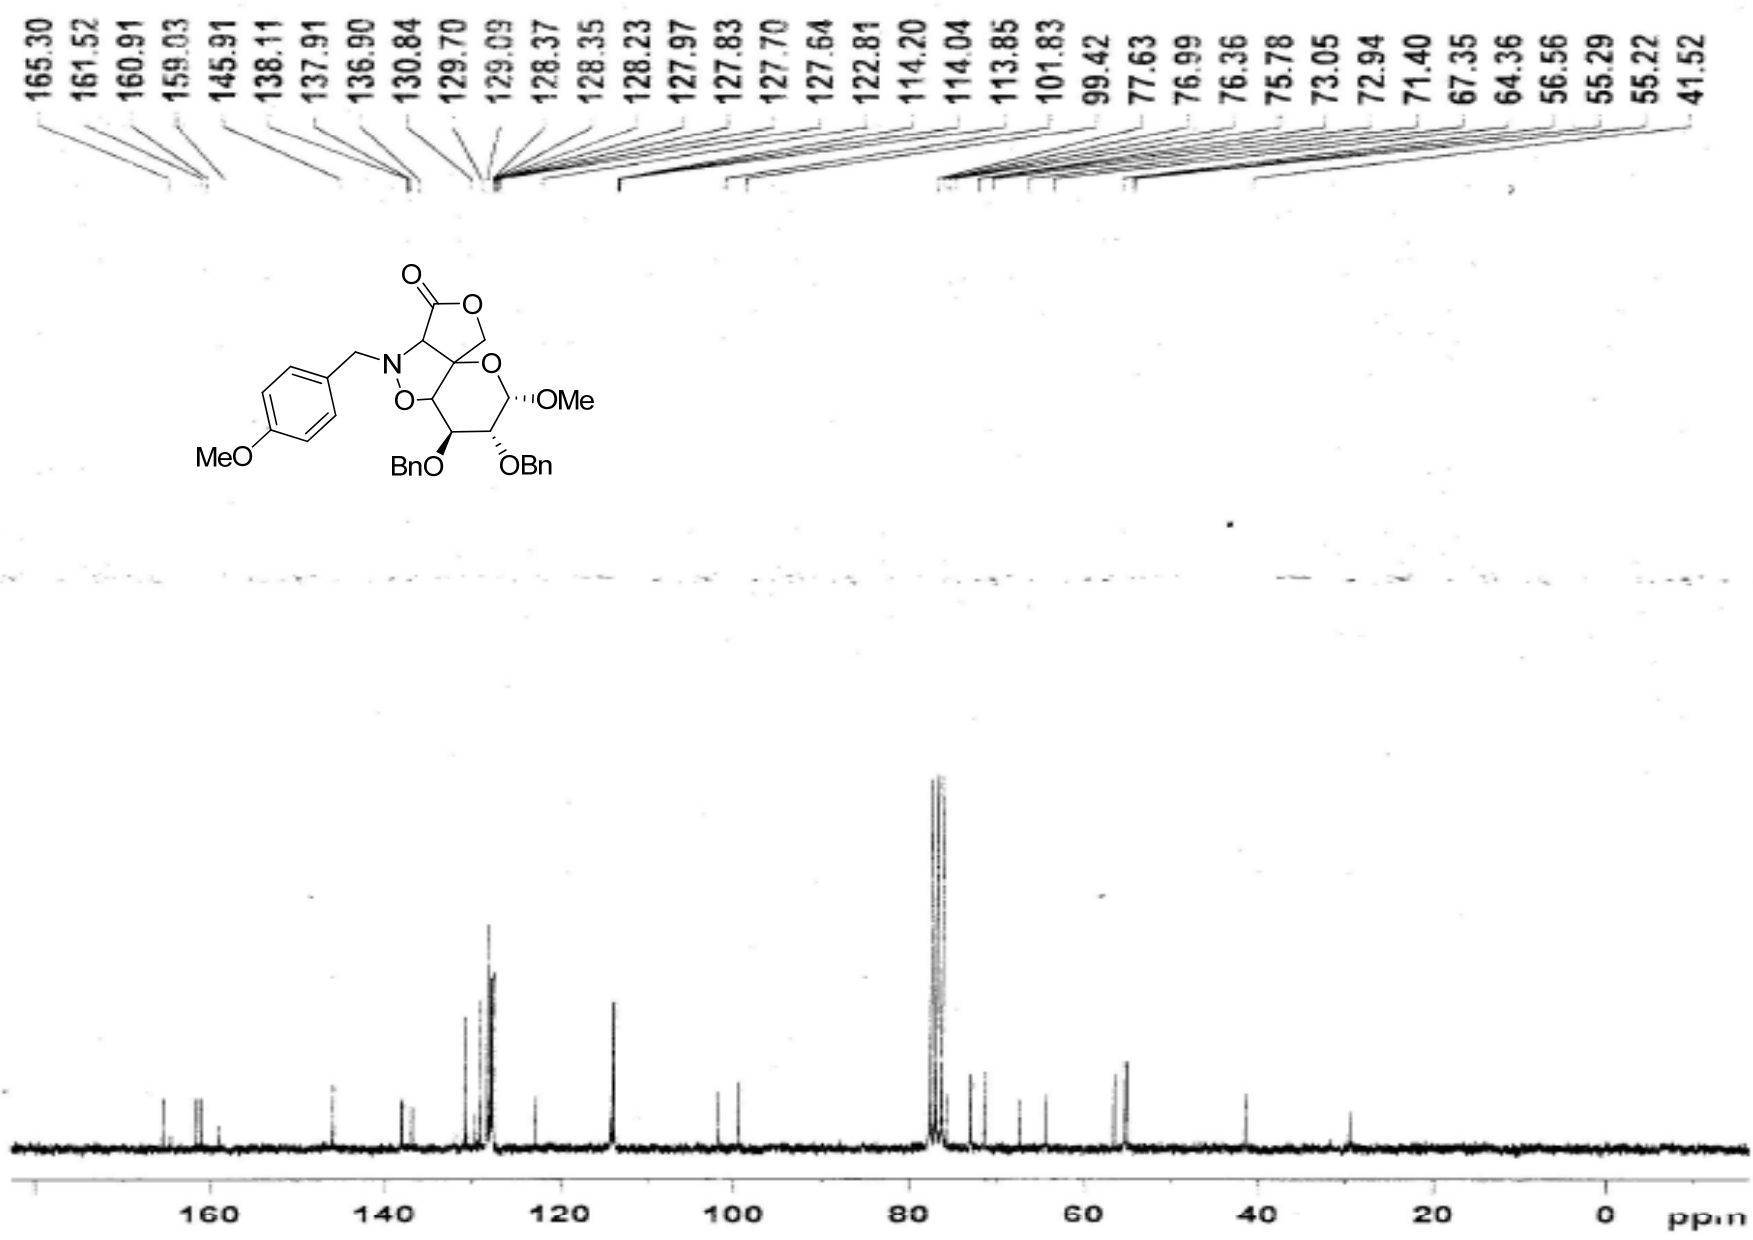

Figure 74 <sup>13</sup>C NMR spectrum of compound 53
